# Supplementary material for: Population structure, adaptation and divergence of the meadow spittlebug, Philaenus spumarius (Hemiptera, Aphrophoridae), revealed by genomic and morphological data
Source: PeerJ. 2021 Jun 1;9:e11425. doi: 10.7717/peerj.11425 (PMC8176912; doi:10.7717/peerj.11425)
Supplement: Supplemental Information 2 [file peerj-09-11425-s002.xlsx]

## Sheet: Table S1 samples
Sample	POP	Sex/Stage (Nymph;M-male; F-female)	Locality	Locality details	Lat (Decimal degrees)	Lon (Decimal degrees)	Collector	Date	mtDNA	OXI Haplogroup	OXI haplotype (Rodrigues et al 2014 and this study)	Rad-seq	Lanes	Order_lane	Barcode	Stacks process_radtags	Total reads	No RadTag	Low Quality	Retained	%	Keep in analysis (sufficient number of reads)	VCFTOOLS	Kept_samples_1	VCFTOOLS	INDV	O(HOM)	E(HOM)	N_SITES	F	INDV	N_DATA	N_GENOTYPES_FILTERED	N_MISS	F_MISS	PCA	EV1	EV2	Kept_samples_9pops_133ind	VCFTOOLS_9pops_133ind_1691SNPs	VCF_9pops_133ind	vcf_order_9pops_133ind	INDV	N_SITES	MEAN_DEPTH	INDV	N_DATA	N_GENOTYPES_FILTERED	N_MISS
AZ1	AZO	Nymph	São Miguel, Açores	Tronqueira, Miradouro, S.Miguel, Açores	37.7963	-25.1846	Paulo Borges, Carla Rego	2010-06-10	YES	western	H71	YES	SbfIB	38	GACTA		2182410	135028	184618	1862764	85.3535	YES		AZ1	SbfIB_trim3_masmiss080_maxmeanDP200.het	AZ1.1.trim3	3567	2931	3831	0.70668	AZ1.1.trim3	4535	0	704	0.155237		-0.0220674	-0.100974	AZ1		AZ1.1.trim3	1	AZ1.1.trim3	1691	47.4441	AZ1.1.trim3	1691	0	367
AZ10	AZO	Nymph	São Miguel, Açores	Tronqueira, Miradouro, S.Miguel, Açores	37.7963	-25.1846	Paulo Borges, Carla Rego	2010-06-10				YES	SbfIB	55	TATAC		3403836	210634	347673	2845529	83.5977	YES		AZ10	SbfIB_trim3_masmiss080_maxmeanDP200.het	AZ10.1.trim3	3713	3107.2	4054	0.63983	AZ10.1.trim3	4535	0	481	0.106064		-0.0228428	-0.110251	AZ10		AZ10.1.trim3	2	AZ10.1.trim3	1691	64.7747	AZ10.1.trim3	1691	0	223
AZ12	AZO	Nymph	São Miguel, Açores	Tronqueira, Miradouro, S.Miguel, Açores	37.7963	-25.1846	Paulo Borges, Carla Rego	2010-06-10				YES	SbfIB	53	TCTCT		1491564	163992	146447	1181125	79.187	YES		AZ12	SbfIB_trim3_masmiss080_maxmeanDP200.het	AZ12.1.trim3	3295	2663.6	3486	0.76774	AZ12.1.trim3	4535	0	1049	0.231312		-0.0187972	-0.0993281	AZ12		AZ12.1.trim3	3	AZ12.1.trim3	1691	35.2537	AZ12.1.trim3	1691	0	532
AZ13	AZO	Nymph	São Miguel, Açores	Tronqueira, Miradouro, S.Miguel, Açores	37.7963	-25.1846	Paulo Borges, Carla Rego	2010-06-10	YES	western	H24	YES	SbfIB	52	TGCAA		2229706	230395	117061	1882250	84.417	YES		AZ13	SbfIB_trim3_masmiss080_maxmeanDP200.het	AZ13.1.trim3	3364	2854.5	3724	0.58595	AZ13.1.trim3	4535	0	811	0.178831		-0.0573749	0.0752802	AZ13		AZ13.1.trim3	4	AZ13.1.trim3	1691	48.2768	AZ13.1.trim3	1691	0	380
AZ17	AZO	Nymph	São Miguel, Açores	Tronqueira, Miradouro, S.Miguel, Açores	37.7963	-25.1846	Paulo Borges, Carla Rego	2010-06-10				YES	SbfIA	36	GATCG		3596970	109395	214204	3273371	91.0036	YES		AZ17	SbfIA_trim3_masmiss055_maxmeanDP200.het	AZ17.1.trim3	1125	1011.8	1317	0.37089	AZ17.1.trim3	2686	0	78	0.0290395		-0.112433	0.197737	AZ17		AZ17.1.trim3	5	AZ17.1.trim3	1691	95.948	AZ17.1.trim3	1691	0	74
AZ18	AZO	Nymph	São Miguel, Açores	Tronqueira, Miradouro, S.Miguel, Açores	37.7963	-25.1846	Paulo Borges, Carla Rego	2010-06-10				YES	SbfIA	37	GACTA		7286254	142796	335001	6808457	93.4425	YES		AZ18	SbfIA_trim3_masmiss055_maxmeanDP200.het	AZ18.1.trim3	1104	1001.6	1303	0.33985	AZ18.1.trim3	2686	0	105	0.0390916		-0.140087	0.22571	AZ18		AZ18.1.trim3	6	AZ18.1.trim3	1691	183.271	AZ18.1.trim3	1691	0	73
AZ19	AZO	Nymph	São Miguel, Açores	Tronqueira, Miradouro, S.Miguel, Açores	37.7963	-25.1846	Paulo Borges, Carla Rego	2010-06-10				YES	SbfIA	38	AGTCA		5810128	213551	565950	5030627	86.5838	YES		AZ19	SbfIA_trim3_masmiss055_maxmeanDP200.het	AZ19.1.trim3	1108	1005	1309	0.33884	AZ19.1.trim3	2686	0	107	0.0398362		-0.138639	0.194436	AZ19		AZ19.1.trim3	7	AZ19.1.trim3	1691	124.205	AZ19.1.trim3	1691	0	93
AZ2	AZO	Nymph	São Miguel, Açores	Tronqueira, Miradouro, S.Miguel, Açores	37.7963	-25.1846	Paulo Borges, Carla Rego	2010-06-10	YES	western	H24	YES	SbfIC	5	GAGAT		1580414	148820	120803	1310791	82.9397	YES		AZ2	SbfIC_trim3_masmiss080_maxmeanDP200.het	AZ2.1.trim3	1797	1530.8	2015	0.54973	AZ2.1.trim3	2188	0	173	0.0790676		-0.08702	0.0413899	AZ2		AZ2.1.trim3	8	AZ2.1.trim3	1691	36.4636	AZ2.1.trim3	1691	0	230
AZ20	AZO	Nymph	São Miguel, Açores	Tronqueira, Miradouro, S.Miguel, Açores	37.7963	-25.1846	Paulo Borges, Carla Rego	2010-06-10				YES	SbfIA	39	AGCTG		4315620	71236	192723	4051661	93.8836	YES		AZ20	SbfIA_trim3_masmiss055_maxmeanDP200.het	AZ20.1.trim3	1148	1009.6	1313	0.45612	AZ20.1.trim3	2686	0	98	0.0364855		-0.123883	0.200863	AZ20		AZ20.1.trim3	9	AZ20.1.trim3	1691	132.773	AZ20.1.trim3	1691	0	87
AZ3	AZO	Nymph	São Miguel, Açores	Tronqueira, Miradouro, S.Miguel, Açores	37.7963	-25.1846	Paulo Borges, Carla Rego	2010-06-10				YES	SbfIC	6	GCATT		7801878	194811	553810	7053257	90.4046	YES		AZ3	SbfIC_trim3_masmiss080_maxmeanDP200.het	AZ3.1.trim3	1805	1579.6	2076	0.45403	AZ3.1.trim3	2188	0	112	0.0511883		-0.0868919	0.0412981	AZ3		AZ3.1.trim3	10	AZ3.1.trim3	1691	194.839	AZ3.1.trim3	1691	0	90
AZ4	AZO	Nymph	São Miguel, Açores	Tronqueira, Miradouro, S.Miguel, Açores	37.7963	-25.1846	Paulo Borges, Carla Rego	2010-06-10	YES	western	H24	YES	SbfIC	7	GCGCC		4588940	113654	323290	4151996	90.4783	YES		AZ4	SbfIC_trim3_masmiss080_maxmeanDP200.het	AZ4.1.trim3	1776	1592.3	2097	0.36397	AZ4.1.trim3	2188	0	91	0.0415905		-0.0845412	0.0444871	AZ4		AZ4.1.trim3	11	AZ4.1.trim3	1691	137.704	AZ4.1.trim3	1691	0	65
AZ6	AZO	Nymph	São Miguel, Açores	Tronqueira, Miradouro, S.Miguel, Açores	37.7963	-25.1846	Paulo Borges, Carla Rego	2010-06-10				YES	SbfIB	56	TACGT		15556794	2245068	1266968	12044758	77.4244	YES		AZ6	SbfIB_trim3_masmiss080_maxmeanDP200.het	AZ6.1.trim3	3319	3116.7	4061	0.21423	AZ6.1.trim3	4535	0	474	0.10452		-0.0185255	-0.116535	AZ6		AZ6.1.trim3	12	AZ6.1.trim3	1691	151.238	AZ6.1.trim3	1691	0	99
AZ7	AZO	Nymph	São Miguel, Açores	Tronqueira, Miradouro, S.Miguel, Açores	37.7963	-25.1846	Paulo Borges, Carla Rego	2010-06-10				YES	SbfIC	52	TTTTA		2015428	158610	139458	1717360	85.2107	YES		AZ7	SbfIC_trim3_masmiss080_maxmeanDP200.het	AZ7.1.trim3	1665	1348.6	1779	0.73511	AZ7.1.trim3	2188	0	409	0.186929		-0.0830833	0.059869	AZ7		AZ7.1.trim3	13	AZ7.1.trim3	1691	48.9302	AZ7.1.trim3	1691	0	460
AZ9	AZO	Nymph	São Miguel, Açores	Tronqueira, Miradouro, S.Miguel, Açores	37.7963	-25.1846	Paulo Borges, Carla Rego	2010-06-10				YES	SbfIC	51	CACAG		2018570	106705	152976	1758889	87.1354	YES		AZ9	SbfIC_trim3_masmiss080_maxmeanDP200.het	AZ9.1.trim3	1687	1356.8	1787	0.76756	AZ9.1.trim3	2188	0	401	0.183272		-0.0780671	0.0349804	AZ9		AZ9.1.trim3	14	AZ9.1.trim3	1691	50.8108	AZ9.1.trim3	1691	0	461
AZ11	AZO	Nymph	São Miguel, Açores	Tronqueira, Miradouro, S.Miguel, Açores	37.7963	-25.1846	Paulo Borges, Carla Rego	2010-06-10				YES	SbfIB	54	TCCTC		1057902	213540	94851	749511	70.8488	OUT		AZ11	SbfIB_trim3_masmiss080_maxmeanDP200.het	AZ11.1.trim3	2452	1925.1	2526	0.87685	AZ11.1.trim3	4535	0	2009	0.442999		-0.0121582	-0.0624658
AZ14	AZO	Nymph	São Miguel, Açores	Tronqueira, Miradouro, S.Miguel, Açores	37.7963	-25.1846	Paulo Borges, Carla Rego	2010-06-10				YES	SbfIA	9	GTACA		2964488	53227	1494839	1416422	47.7797	OUT		AZ14	SbfIA_trim3_masmiss055_maxmeanDP200.het	AZ14.1.trim3	67	50.3	67	1	AZ14.1.trim3	2686	0	2527	0.940804		-0.00291428	0.00473554
AZ15	AZO	Nymph	São Miguel, Açores	Tronqueira, Miradouro, S.Miguel, Açores	37.7963	-25.1846	Paulo Borges, Carla Rego	2010-06-10				YES	SbfIA	10	GTGTG		1530224	58829	748256	723139	47.2571	OUT		AZ15	SbfIA_trim3_masmiss055_maxmeanDP200.het	AZ15.1.trim3	35	27.7	36	0.88014	AZ15.1.trim3	2686	0	2598	0.967238		-0.00629006	0.00702539
AZ16	AZO	Nymph	São Miguel, Açores	Tronqueira, Miradouro, S.Miguel, Açores	37.7963	-25.1846	Paulo Borges, Carla Rego	2010-06-10				YES	SbfIA	11	TAATG		3820508	187739	1869317	1763452	46.1575	OUT		AZ16	SbfIA_trim3_masmiss055_maxmeanDP200.het	AZ16.1.trim3	325	253.6	328	0.95968	AZ16.1.trim3	2686	0	2033	0.756888		-0.0305292	0.0201938
AZ5	AZO	Nymph	São Miguel, Açores	Tronqueira, Miradouro, S.Miguel, Açores	37.7963	-25.1846	Paulo Borges, Carla Rego	2010-06-10				YES	SbfIC	8	GGAAG		128700	39684	14343	74673	58.021	OUT
AZ8	AZO	Nymph	São Miguel, Açores	Tronqueira, Miradouro, S.Miguel, Açores	37.7963	-25.1846	Paulo Borges, Carla Rego	2010-06-10				YES	SbfIA	8	GGGGA		3949464	67392	1975044	1907028	48.2857	OUT		AZ8	SbfIA_trim3_masmiss055_maxmeanDP200.het	AZ8.1.trim3	80	59.8	80	1	AZ8.1.trim3	2686	0	2509	0.934103		-0.00138395	0.0069125
Fin26	FIN	M	Haaparnaki-Keuruu	Haapanaki-Keuruu	62.2591	24.7078	Olli Halkka	2010-08-20				YES	SbfIC	29	ATGCT		4725236	150461	321111	4253664	90.0201	YES		Fin26	SbfIC_trim3_masmiss080_maxmeanDP200.het	Fin26.1.trim3	1867	1559.5	2055	0.62057	Fin26.1.trim3	2188	0	133	0.0607861		-0.0931489	0.210975	Fin26		Fin26.1.trim3	33	Fin26.1.trim3	1691	139.604	Fin26.1.trim3	1691	0	158
Fin28	FIN	F	Haaparnaki-Keuruu	Haapanaki-Keuruu	62.2591	24.7078	Olli Halkka	2010-08-20				YES	SbfIA	28	ATTAG		859290	106728	157687	594875	69.2287	YES		Fin28	SbfIA_trim3_masmiss055_maxmeanDP200.het	Fin28.1.trim3	1038	828.8	1080	0.83283	Fin28.1.trim3	2686	0	545	0.202904		-0.0892393	-0.345774	Fin28		Fin28.1.trim3	34	Fin28.1.trim3	1691	13.6404	Fin28.1.trim3	1691	0	775
Fin29	FIN	F	Haaparnaki-Keuruu	Haapanaki-Keuruu	62.2591	24.7078	Olli Halkka	2010-08-20				YES	SbfIA	29	ATCGA		4922896	388036	560666	3974194	80.7288	YES		Fin29	SbfIA_trim3_masmiss055_maxmeanDP200.het	Fin29.1.trim3	1174	1004.7	1307	0.56009	Fin29.1.trim3	2686	0	101	0.0376024		-0.104344	-0.309859	Fin29		Fin29.1.trim3	35	Fin29.1.trim3	1691	50.4418	Fin29.1.trim3	1691	0	154
Fin3	FIN	M	Haaparnaki-Keuruu	Haapanaki-Keuruu	62.2591	24.7078	Olli Halkka	2010-08-20	YES	north-eastern	H7	YES	SbfIC	9	GGGGA		1388990	315564	97801	975625	70.2399	YES		Fin3	SbfIC_trim3_masmiss080_maxmeanDP200.het	Fin3.1.trim3	1564	1298.4	1709	0.64689	Fin3.1.trim3	2188	0	479	0.218921		-0.0665928	0.168143	Fin3		Fin3.1.trim3	36	Fin3.1.trim3	1691	17.0242	Fin3.1.trim3	1691	0	642
Fin30	FIN	F	Haaparnaki-Keuruu	Haapanaki-Keuruu	62.2591	24.7078	Olli Halkka	2010-08-20				YES	SbfIA	30	GTTGT		773106	97196	54828	621082	80.3359	YES		Fin30	SbfIA_trim3_masmiss055_maxmeanDP200.het	Fin30.1.trim3	1063	858.6	1122	0.77598	Fin30.1.trim3	2686	0	466	0.173492		-0.091471	-0.278945	Fin30		Fin30.1.trim3	37	Fin30.1.trim3	1691	14.9225	Fin30.1.trim3	1691	0	722
Fin32	FIN	M	Haaparnaki-Keuruu	Haapanaki-Keuruu	62.2591	24.7078	Olli Halkka	2010-08-20				YES	SbfIA	31	GTCAC		8637948	1077941	381315	7178692	83.1065	YES		Fin32	SbfIA_trim3_masmiss055_maxmeanDP200.het	Fin32.1.trim3	1124	1013	1318	0.36401	Fin32.1.trim3	2686	0	75	0.0279226		-0.110543	-0.0376828	Fin32		Fin32.1.trim3	38	Fin32.1.trim3	1691	107.646	Fin32.1.trim3	1691	0	74
Fin33	FIN	F	Haaparnaki-Keuruu	Haapanaki-Keuruu	62.2591	24.7078	Olli Halkka	2010-08-20				YES	SbfIB	27	AGAGT		3721646	284631	163728	3273287	87.9527	YES		Fin33	SbfIB_trim3_masmiss080_maxmeanDP200.het	Fin33.1.trim3	3876	3202.6	4183	0.68686	Fin33.1.trim3	4535	0	352	0.0776185		-0.0239469	-0.0848399	Fin33		Fin33.1.trim3	39	Fin33.1.trim3	1691	79.9196	Fin33.1.trim3	1691	0	141
Fin36	FIN	M	Haaparnaki-Keuruu	Haapanaki-Keuruu	62.2591	24.7078	Olli Halkka	2010-08-20	YES	eastern-Med	H57	YES	SbfIC	30	CAACT		2654550	134622	183709	2336219	88.0081	YES		Fin36	SbfIC_trim3_masmiss080_maxmeanDP200.het	Fin36.1.trim3	1790	1447	1909	0.7424	Fin36.1.trim3	2188	0	279	0.127514		0.301463	0.0366482	Fin36		Fin36.1.trim3	40	Fin36.1.trim3	1691	74.2011	Fin36.1.trim3	1691	0	289
Fin37	FIN	M	Haaparnaki-Keuruu	Haapanaki-Keuruu	62.2591	24.7078	Olli Halkka	2010-08-20	YES	eastern-Med	H57	YES	SbfIB	25	AAGGG		2855060	186932	135970	2532158	88.6902	YES		Fin37	SbfIB_trim3_masmiss080_maxmeanDP200.het	Fin37.1.trim3	3759	3139.4	4107	0.64036	Fin37.1.trim3	4535	0	428	0.0943771		-0.118602	0.245457	Fin37		Fin37.1.trim3	41	Fin37.1.trim3	1691	77.8888	Fin37.1.trim3	1691	0	160
Fin38	FIN	M	Haaparnaki-Keuruu	Haapanaki-Keuruu	62.2591	24.7078	Olli Halkka	2010-08-20	YES	eastern-Med	H57	YES	SbfIB	24	AAAAA		2933886	138462	169034	2626390	89.5192	YES		Fin38	SbfIB_trim3_masmiss080_maxmeanDP200.het	Fin38.1.trim3	3776	3161.2	4135	0.63133	Fin38.1.trim3	4535	0	400	0.0882029		-0.107484	0.23939	Fin38		Fin38.1.trim3	42	Fin38.1.trim3	1691	73.0308	Fin38.1.trim3	1691	0	176
Fin6	FIN		Haaparnaki-Keuruu	Haapanaki-Keuruu	62.2591	24.7078	Olli Halkka	2010-08-20	YES	north-eastern	H7	YES	SbfIC	10	GTACA		2674440	197327	181766	2295347	85.8253	YES		Fin6	SbfIC_trim3_masmiss080_maxmeanDP200.het	Fin6.1.trim3	1760	1567.6	2061	0.38999	Fin6.1.trim3	2188	0	127	0.0580439		-0.0920841	0.187838	Fin6		Fin6.1.trim3	43	Fin6.1.trim3	1691	59.6156	Fin6.1.trim3	1691	0	115
Fin7	FIN		Haaparnaki-Keuruu	Haapanaki-Keuruu	62.2591	24.7078	Olli Halkka	2010-08-20	YES	north-eastern	H4	YES	SbfIC	11	GTGTG		2612136	243603	162900	2205633	84.4379	YES		Fin7	SbfIC_trim3_masmiss080_maxmeanDP200.het	Fin7.1.trim3	1855	1580.7	2082	0.54716	Fin7.1.trim3	2188	0	106	0.0484461		-0.0991645	0.216945	Fin7		Fin7.1.trim3	44	Fin7.1.trim3	1691	46.9947	Fin7.1.trim3	1691	0	164
Fin8	FIN		Haaparnaki-Keuruu	Haapanaki-Keuruu	62.2591	24.7078	Olli Halkka	2010-08-20				YES	SbfIC	13	TAGCA		3476018	272744	227710	2975564	85.6027	YES		Fin8	SbfIC_trim3_masmiss080_maxmeanDP200.het	Fin8.1.trim3	1847	1561.9	2056	0.57704	Fin8.1.trim3	2188	0	132	0.0603291		-0.0837119	0.175155	Fin8		Fin8.1.trim3	45	Fin8.1.trim3	1691	50.7351	Fin8.1.trim3	1691	0	139
Fin9	FIN		Haaparnaki-Keuruu	Haapanaki-Keuruu	62.2591	24.7078	Olli Halkka	2010-08-20	YES	Western/north-eastern	H18+2subst	YES	SbfIC	59	TACGT		2711442	203104	173489	2334849	86.111	YES		Fin9	SbfIC_trim3_masmiss080_maxmeanDP200.het	Fin9.1.trim3	1737	1460	1924	0.59699	Fin9.1.trim3	2188	0	264	0.120658		-0.0910936	0.202405	Fin9		Fin9.1.trim3	46	Fin9.1.trim3	1691	67.5683	Fin9.1.trim3	1691	0	295
Fin1	FIN		Haaparnaki-Keuruu	Haapanaki-Keuruu	62.2591	24.7078	Olli Halkka	2010-08-20				YES	SbfIB	37	GATCG		128012	46914	7209	73889	57.7204	OUT
Fin10	FIN		Haaparnaki-Keuruu	Haapanaki-Keuruu	62.2591	24.7078	Olli Halkka	2010-08-20				YES	SbfIC	58	TATAC		1648276	116948	115891	1415437	85.8738	OUT		Fin10	SbfIC_trim3_masmiss080_maxmeanDP200.het	Fin10.1.trim3	1451	1144.7	1512	0.83391	Fin10.1.trim3	2188	0	676	0.308958		-0.0613759	0.157242
Fin15	FIN		Haaparnaki-Keuruu	Haapanaki-Keuruu	62.2591	24.7078	Olli Halkka	2010-08-20				YES	SbfIA	1	CGATA		5605662	432997	2803718	2368947	42.2599	OUT		Fin15	SbfIA_trim3_masmiss055_maxmeanDP200.het	Fin15.1.trim3	62	48	63	0.93346	Fin15.1.trim3	2686	0	2556	0.951601		-0.0065625	-0.00984267
Fin24	FIN	M	Haaparnaki-Keuruu	Haapanaki-Keuruu	62.2591	24.7078	Olli Halkka	2010-08-20				YES	SbfIA	2	CGGCG		1061204	109505	516539	435160	41.0063	OUT
Fin25	FIN	M	Haaparnaki-Keuruu	Haapanaki-Keuruu	62.2591	24.7078	Olli Halkka	2010-08-20				YES	SbfIA	3	CTAGG		344526	42851	138782	162893	47.2803	OUT
Fin27	FIN	F	Haaparnaki-Keuruu	Haapanaki-Keuruu	62.2591	24.7078	Olli Halkka	2010-08-20				YES	SbfIA	4	GAAGC		1411868	122044	686666	603158	42.7206	OUT		Fin27	SbfIA_trim3_masmiss055_maxmeanDP200.het	Fin27.1.trim3	116	89.8	117	0.96325	Fin27.1.trim3	2686	0	2453	0.913254		-0.0103777	0.00701242
Fin34	FIN	M	Haaparnaki-Keuruu	Haapanaki-Keuruu	62.2591	24.7078	Olli Halkka	2010-08-20				YES	SbfIB	26	ACGTA		1047158	182933	45706	818519	78.1658	OUT		Fin34	SbfIB_trim3_masmiss080_maxmeanDP200.het	Fin34.1.trim3	2655	2086.4	2734	0.87801	Fin34.1.trim3	4535	0	1801	0.397133		-0.0115658	-0.056783
Fin35	FIN	F	Haaparnaki-Keuruu	Haapanaki-Keuruu	62.2591	24.7078	Olli Halkka	2010-08-20				YES	SbfIB	26	ACACG		408402	32082	25882	350438	85.8071	OUT
F1	FRAN	Nymph	Fitou		42.8803	2.99281	Eduardo Marabuto, Ana Rodrigues, Sara Silva, Rui Nunes e Luis Ferreira	Apr.2010	YES	eastern-Med/western	H49	YES	SbfIB	33	GGTTC		6917158	858415	574024	5484719	79.2915	YES		F1	SbfIB_trim3_masmiss080_maxmeanDP200.het	F1.1.trim3	3740	3160.8	4127	0.59947	F1.1.trim3	4535	0	408	0.0899669		-0.01713	-0.109757	F1		F1.1.trim3	15	F1.1.trim3	1691	70.3613	F1.1.trim3	1691	0	217
F2	FRAN	Nymph	Fitou		42.8803	2.99281	Eduardo Marabuto, Ana Rodrigues, Sara Silva, Rui Nunes e Luis Ferreira	Apr.2010	YES	eastern-Med/western	H49	YES	SbfIB	32	GTCAC		4004812	1095051	356248	2553513	63.7611	YES		F2	SbfIB_trim3_masmiss080_maxmeanDP200.het	F2.1.trim3	3474	2947.3	3856	0.5796	F2.1.trim3	4535	0	679	0.149724		-0.021525	-0.112536	F2		F2.1.trim3	16	F2.1.trim3	1691	44.304	F2.1.trim3	1691	0	384
F3	FRAN	Nymph	Fitou		42.8803	2.99281	Eduardo Marabuto, Ana Rodrigues, Sara Silva, Rui Nunes e Luis Ferreira	Apr.2010				YES	SbfIC	25	AAGGG		10966640	2481483	947341	7537816	68.7341	YES		F3	SbfIC_trim3_masmiss080_maxmeanDP200.het	F3.1.trim3	1766	1563	2058	0.41005	F3.1.trim3	2188	0	130	0.059415		-0.0557938	-0.071203	F3		F3.1.trim3	17	F3.1.trim3	1691	100.202	F3.1.trim3	1691	0	90
Fran12	FRAN	M	Fitou		42.8803	2.99281	Eduardo Marabuto, Ana Rodrigues, Sara Silva, Rui Nunes e Luis Ferreira	Apr.2010				YES	SbfIB	50	TTCCG		5211126	152708	477084	4581334	87.9145	YES		Fran12	SbfIB_trim3_masmiss080_maxmeanDP200.het	Fran12.1.trim3	3784	3260.8	4255	0.52626	Fran12.1.trim3	4535	0	280	0.061742		-0.0180196	-0.11561	Fran12		Fran12.1.trim3	18	Fran12.1.trim3	1691	134.095	Fran12.1.trim3	1691	0	115
Fran14	FRAN	M	Fitou		42.8803	2.99281	Eduardo Marabuto, Ana Rodrigues, Sara Silva, Rui Nunes e Luis Ferreira	Apr.2010				YES	SbfIA	43	CGCGC		2001362	81215	100180	1819967	90.9364	YES		Fran14	SbfIA_trim3_masmiss055_maxmeanDP200.het	Fran14.1.trim3	1155	999.2	1300	0.5179	Fran14.1.trim3	2686	0	109	0.0405808		-0.054004	0.236137	Fran14		Fran14.1.trim3	19	Fran14.1.trim3	1691	56.9805	Fran14.1.trim3	1691	0	152
Fran15	FRAN	Nymph	Fitou		42.8803	2.99281	Eduardo Marabuto, Ana Rodrigues, Sara Silva, Rui Nunes e Luis Ferreira	Apr.2010				YES	SbfIA	44	CCTTG		9210980	753279	554429	7903272	85.8027	YES		Fran15	SbfIA_trim3_masmiss055_maxmeanDP200.het	Fran15.1.trim3	1112	995.3	1293	0.39199	Fran15.1.trim3	2686	0	161	0.0599404		-0.0492189	0.195016	Fran15		Fran15.1.trim3	20	Fran15.1.trim3	1691	129.513	Fran15.1.trim3	1691	0	105
Fran16	FRAN	Nymph	Fitou		42.8803	2.99281	Eduardo Marabuto, Ana Rodrigues, Sara Silva, Rui Nunes e Luis Ferreira	Apr.2010				YES	SbfIA	45	CCCCA		7514630	275376	409827	6829427	90.8817	YES		Fran16	SbfIA_trim3_masmiss055_maxmeanDP200.het	Fran16.1.trim3	1116	994	1293	0.40811	Fran16.1.trim3	2686	0	142	0.0528667		-0.0497368	0.179245	Fran16		Fran16.1.trim3	21	Fran16.1.trim3	1691	142.742	Fran16.1.trim3	1691	0	100
Fran17	FRAN	Nymph	Fitou		42.8803	2.99281	Eduardo Marabuto, Ana Rodrigues, Sara Silva, Rui Nunes e Luis Ferreira	Apr.2010	YES	western	H19+2subst	YES	SbfIA	46	CATGA		7117190	561568	338656	6216966	87.3514	YES		Fran17	SbfIA_trim3_masmiss055_maxmeanDP200.het	Fran17.1.trim3	1124	1003.4	1307	0.39722	Fran17.1.trim3	2686	0	112	0.0416977		-0.045346	0.167473	Fran17		Fran17.1.trim3	22	Fran17.1.trim3	1691	136.407	Fran17.1.trim3	1691	0	86
Fran18	FRAN	Nymph	Fitou		42.8803	2.99281	Eduardo Marabuto, Ana Rodrigues, Sara Silva, Rui Nunes e Luis Ferreira	Apr.2010				YES	SbfIB	15	TCGAG		4078804	214266	273262	3591276	88.0473	YES		Fran18	SbfIB_trim3_masmiss080_maxmeanDP200.het	Fran18.1.trim3	3808	3237	4231	0.57447	Fran18.1.trim3	4535	0	304	0.0670342		-0.0127047	-0.0989005	Fran18		Fran18.1.trim3	23	Fran18.1.trim3	1691	89.2921	Fran18.1.trim3	1691	0	145
Fran19	FRAN	Nymph	Fitou		42.8803	2.99281	Eduardo Marabuto, Ana Rodrigues, Sara Silva, Rui Nunes e Luis Ferreira	Apr.2010				YES	SbfIB	14	TCAGA		12318688	268690	779835	11270163	91.4883	YES		Fran19	SbfIB_trim3_masmiss080_maxmeanDP200.het	Fran19.1.trim3	3661	3193.5	4174	0.47681	Fran19.1.trim3	4535	0	361	0.0796031		-0.0108195	-0.0994929	Fran19		Fran19.1.trim3	24	Fran19.1.trim3	1691	295.94	Fran19.1.trim3	1691	0	92
Fran20	FRAN	Nymph	Fitou		42.8803	2.99281	Eduardo Marabuto, Ana Rodrigues, Sara Silva, Rui Nunes e Luis Ferreira	Apr.2010				YES	SbfIB	13	TAGCA		8711350	1125602	509798	7075950	81.2268	YES		Fran20	SbfIB_trim3_masmiss080_maxmeanDP200.het	Fran20.1.trim3	3691	3207.7	4197	0.4885	Fran20.1.trim3	4535	0	338	0.0745314		-0.0109757	-0.0998958	Fran20		Fran20.1.trim3	25	Fran20.1.trim3	1691	133.103	Fran20.1.trim3	1691	0	109
Fran21	FRAN		Fitou		42.8803	2.99281	Eduardo Marabuto, Ana Rodrigues, Sara Silva, Rui Nunes e Luis Ferreira	Apr.2010				YES	SbfIB	12	TAATG		10640044	2383324	540641	7716079	72.5192	YES		Fran21	SbfIB_trim3_masmiss080_maxmeanDP200.het	Fran21.1.trim3	3622	3181.5	4150	0.45483	Fran21.1.trim3	4535	0	385	0.0848953		-0.0023982	-0.0852335	Fran21		Fran21.1.trim3	26	Fran21.1.trim3	1691	112.671	Fran21.1.trim3	1691	0	109
Fran22	FRAN		Fitou		42.8803	2.99281	Eduardo Marabuto, Ana Rodrigues, Sara Silva, Rui Nunes e Luis Ferreira	Apr.2010				YES	SbfIB	11	GTGTG		6357106	442305	348565	5566236	87.5593	YES		Fran22	SbfIB_trim3_masmiss080_maxmeanDP200.het	Fran22.1.trim3	3776	3258.4	4258	0.51779	Fran22.1.trim3	4535	0	277	0.0610805		-0.0148314	-0.0993614	Fran22		Fran22.1.trim3	27	Fran22.1.trim3	1691	115.971	Fran22.1.trim3	1691	0	104
Fran5	FRAN	F	Fitou		42.8803	2.99281	Eduardo Marabuto, Ana Rodrigues, Sara Silva, Rui Nunes e Luis Ferreira	Apr.2010				YES	SbfIC	26	ACACG		4364406	197893	478188	3688325	84.5092	YES		Fran5	SbfIC_trim3_masmiss080_maxmeanDP200.het	Fran5.1.trim3	1794	1573.4	2068	0.44603	Fran5.1.trim3	2188	0	120	0.0548446		-0.0587983	-0.0881319	Fran5		Fran5.1.trim3	28	Fran5.1.trim3	1691	70.9296	Fran5.1.trim3	1691	0	104
Fran6	FRAN	F	Fitou		42.8803	2.99281	Eduardo Marabuto, Ana Rodrigues, Sara Silva, Rui Nunes e Luis Ferreira	Apr.2010				YES	SbfIC	27	ACGTA		1096464	171675	73633	851156	77.6274	YES		Fran6	SbfIC_trim3_masmiss080_maxmeanDP200.het	Fran6.1.trim3	1687	1398.1	1841	0.65232	Fran6.1.trim3	2188	0	347	0.158592		-0.0506956	-0.0640345	Fran6		Fran6.1.trim3	29	Fran6.1.trim3	1691	21.6558	Fran6.1.trim3	1691	0	524
Fran7	FRAN	F	Fitou		42.8803	2.99281	Eduardo Marabuto, Ana Rodrigues, Sara Silva, Rui Nunes e Luis Ferreira	Apr.2010				YES	SbfIC	48	CCTTG		10983760	271989	941974	9769797	88.9477	YES		Fran7	SbfIC_trim3_masmiss080_maxmeanDP200.het	Fran7.1.trim3	1801	1562.6	2056	0.48322	Fran7.1.trim3	2188	0	132	0.0603291		-0.0537764	-0.0719148	Fran7		Fran7.1.trim3	30	Fran7.1.trim3	1691	231.658	Fran7.1.trim3	1691	0	91
Fran8	FRAN	F	Fitou		42.8803	2.99281	Eduardo Marabuto, Ana Rodrigues, Sara Silva, Rui Nunes e Luis Ferreira	Apr.2010				YES	SbfIC	47	CGCGC		23690236	221664	1843014	21625558	91.2847	YES		Fran8	SbfIC_trim3_masmiss080_maxmeanDP200.het	Fran8.1.trim3	1742	1549.5	2039	0.39332	Fran8.1.trim3	2188	0	149	0.0680987		-0.0482815	-0.0818157	Fran8		Fran8.1.trim3	31	Fran8.1.trim3	1691	608.805	Fran8.1.trim3	1691	0	104
Fran9	FRAN	M	Fitou		42.8803	2.99281	Eduardo Marabuto, Ana Rodrigues, Sara Silva, Rui Nunes e Luis Ferreira	Apr.2010	YES	western	H19	YES	SbfIA	16	TGGTT		2008618	136628	104022	1767968	88.0191	YES		Fran9	SbfIA_trim3_masmiss055_maxmeanDP200.het	Fran9.1.trim3	1139	1008.4	1312	0.43016	Fran9.1.trim3	2686	0	89	0.0331348		0.461812	-0.064087	Fran9		Fran9.1.trim3	32	Fran9.1.trim3	1691	59.3791	Fran9.1.trim3	1691	0	150
Fran10	FRAN	M	Fitou		42.8803	2.99281	Eduardo Marabuto, Ana Rodrigues, Sara Silva, Rui Nunes e Luis Ferreira	Abr.2010				YES	SbfIA	17	TTAAT		3553706	250243	1721946	1581517	44.5033	OUT		Fran10	SbfIA_trim3_masmiss055_maxmeanDP200.het	Fran10.1.trim3	66	51.9	68	0.87552	Fran10.1.trim3	2686	0	2553	0.950484		0.00515493	0.00595469
Fran11	FRAN	M	Fitou		42.8803	2.99281	Eduardo Marabuto, Ana Rodrigues, Sara Silva, Rui Nunes e Luis Ferreira	Abr.2010				YES	SbfIA	18	TTGGC		4088254	425502	1629414	2033338	49.7361	OUT		Fran11	SbfIA_trim3_masmiss055_maxmeanDP200.het	Fran11.1.trim3	159	123.5	161	0.94671	Fran11.1.trim3	2686	0	2363	0.879747		-0.00280113	0.0176862
Fran13	FRAN		Fitou		42.8803	2.99281	Eduardo Marabuto, Ana Rodrigues, Sara Silva, Rui Nunes e Luis Ferreira	Abr.2010				YES	SbfIA	19	AACCC		5751234	287830	2918843	2544561	44.2437	OUT		Fran13	SbfIA_trim3_masmiss055_maxmeanDP200.het	Fran13.1.trim3	160	122.5	161	0.97404	Fran13.1.trim3	2686	0	2338	0.870439		-0.0121763	-0.00188635
GR18_12	GRE	F	Mt Parnassus	Mt Parnassus (local 29; pop GR18)	38.5784	22.5751	Eduardo Marabuto, Ana Sofia Rodrigues, Sara Silva	2011-06-18	YES	eastern-Med	H57	YES	SbfIA	32	GGTTC		930106	29391	53094	847621	91.1317	YES		GR18_12	SbfIA_trim3_masmiss055_maxmeanDP200.het	GR18_12.1.trim3	1116	926.1	1209	0.67121	GR18_12.1.trim3	2686	0	299	0.111318		0.331283	0.0824452	GR18_12		GR18_12.1.trim3	47	GR18_12.1.trim3	1691	25.2874	GR18_12.1.trim3	1691	0	414
GR18_13	GRE	F	Mt Parnassus	Mt Parnassus (local 29; pop GR18)	38.5784	22.5751	Eduardo Marabuto, Ana Sofia Rodrigues, Sara Silva	2011-06-18	YES	Western/north-eastern	H1+1subst	YES	SbfIA	33	GGCCT		790214	75469	57827	656918	83.1317	YES		GR18_13	SbfIA_trim3_masmiss055_maxmeanDP200.het	GR18_13.1.trim3	1092	901	1175	0.69708	GR18_13.1.trim3	2686	0	335	0.124721		-0.0770093	-0.303921	GR18_13		GR18_13.1.trim3	48	GR18_13.1.trim3	1691	20.0254	GR18_13.1.trim3	1691	0	580
GR18_14	GRE	F	Mt Parnassus	Mt Parnassus (local 29; pop GR18)	38.5784	22.5751	Eduardo Marabuto, Ana Sofia Rodrigues, Sara Silva	2011-06-18				YES	SbfIA	34	GCTAA		736248	63143	37627	635478	86.313	YES		GR18_14	SbfIA_trim3_masmiss055_maxmeanDP200.het	GR18_14.1.trim3	1062	862	1119	0.77821	GR18_14.1.trim3	2686	0	452	0.16828		-0.106893	-0.312139	GR18_14		GR18_14.1.trim3	49	GR18_14.1.trim3	1691	17.0266	GR18_14.1.trim3	1691	0	678
GR18_15	GRE	F	Mt Parnassus	Mt Parnassus (local 29; pop GR18)	38.5784	22.5751	Eduardo Marabuto, Ana Sofia Rodrigues, Sara Silva	2011-06-18				YES	SbfIA	35	GCCGG		4471888	67280	155752	4248856	95.0126	YES		GR18_15	SbfIA_trim3_masmiss055_maxmeanDP200.het	GR18_15.1.trim3	1148	1016.2	1322	0.431	GR18_15.1.trim3	2686	0	68	0.0253165		-0.110925	-0.373848	GR18_15		GR18_15.1.trim3	50	GR18_15.1.trim3	1691	128.981	GR18_15.1.trim3	1691	0	96
GR18_16	GRE	M	Mt Parnassus	Mt Parnassus (local 29; pop GR18)	38.5784	22.5751	Eduardo Marabuto, Ana Sofia Rodrigues, Sara Silva	2011-06-18				YES	SbfIC	31	CAGTC		3795440	225411	230082	3339947	87.9989	YES		GR18_16	SbfIC_trim3_masmiss080_maxmeanDP200.het	GR18_16.1.trim3	1718	1391.4	1836	0.73457	GR18_16.1.trim3	2188	0	352	0.160878		-0.0746543	0.152366	GR18_16		GR18_16.1.trim3	51	GR18_16.1.trim3	1691	59.3915	GR18_16.1.trim3	1691	0	390
GR18_17	GRE	M	Mt Parnassus	Mt Parnassus (local 29; pop GR18)	38.5784	22.5751	Eduardo Marabuto, Ana Sofia Rodrigues, Sara Silva	2011-06-18	YES	eastern-Med	H46	YES	SbfIB	23	ACTGC		3695348	51437	188970	3454941	93.4943	YES		GR18_17	SbfIB_trim3_masmiss080_maxmeanDP200.het	GR18_17.1.trim3	3844	3255.7	4256	0.58813	GR18_17.1.trim3	4535	0	279	0.0615215		-0.11466	0.237305	GR18_17		GR18_17.1.trim3	52	GR18_17.1.trim3	1691	114.682	GR18_17.1.trim3	1691	0	111
GR18_18	GRE	M	Mt Parnassus	Mt Parnassus (local 29; pop GR18)	38.5784	22.5751	Eduardo Marabuto, Ana Sofia Rodrigues, Sara Silva	2011-06-18				YES	SbfIB	22	ACCAT		6111402	156163	323896	5631343	92.1449	YES		GR18_18	SbfIB_trim3_masmiss080_maxmeanDP200.het	GR18_18.1.trim3	3701	3205.3	4184	0.5065	GR18_18.1.trim3	4535	0	351	0.077398		-0.114095	0.229216	GR18_18		GR18_18.1.trim3	53	GR18_18.1.trim3	1691	185.994	GR18_18.1.trim3	1691	0	124
GR18_19	GRE	M	Mt Parnassus	Mt Parnassus (local 29; pop GR18)	38.5784	22.5751	Eduardo Marabuto, Ana Sofia Rodrigues, Sara Silva	2011-06-18				YES	SbfIB	21	AATTT		3886496	183566	214771	3488159	89.7507	YES		GR18_19	SbfIB_trim3_masmiss080_maxmeanDP200.het	GR18_19.1.trim3	3818	3217.8	4204	0.6086	GR18_19.1.trim3	4535	0	331	0.0729879		-0.11982	0.251175	GR18_19		GR18_19.1.trim3	54	GR18_19.1.trim3	1691	109.263	GR18_19.1.trim3	1691	0	136
GR18_2	GRE	F	Mt Parnassus	Mt Parnassus (local 29; pop GR18)	38.5784	22.5751	Eduardo Marabuto, Ana Sofia Rodrigues, Sara Silva	2011-06-18				YES	SbfIB	30	ATCGA		1701354	59176	146328	1495850	87.9211	YES		GR18_2	SbfIB_trim3_masmiss080_maxmeanDP200.het	GR18_2.1.trim3	3688	2980	3893	0.77546	GR18_2.1.trim3	4535	0	642	0.141566		-0.112455	0.237235	GR18_2		GR18_2.1.trim3	55	GR18_2.1.trim3	1691	48.2945	GR18_2.1.trim3	1691	0	348
GR18_20	GRE	M	Mt Parnassus	Mt Parnassus (local 29; pop GR18)	38.5784	22.5751	Eduardo Marabuto, Ana Sofia Rodrigues, Sara Silva	2011-06-18	YES	eastern-Med	H57	YES	SbfIB	20	AACCC		2339256	87760	119572	2131924	91.1368	YES		GR18_20	SbfIB_trim3_masmiss080_maxmeanDP200.het	GR18_20.1.trim3	3782	3163	4137	0.63553	GR18_20.1.trim3	4535	0	398	0.0877619		-0.115997	0.248084	GR18_20		GR18_20.1.trim3	56	GR18_20.1.trim3	1691	71.4122	GR18_20.1.trim3	1691	0	173
GR18_3	GRE	F	Mt Parnassus	Mt Parnassus (local 29; pop GR18)	38.5784	22.5751	Eduardo Marabuto, Ana Sofia Rodrigues, Sara Silva	2011-06-18				YES	SbfIB	28	ATTAG		2531712	51653	244872	2235187	88.2876	YES		GR18_3	SbfIB_trim3_masmiss080_maxmeanDP200.het	GR18_3.1.trim3	3764	3102.9	4059	0.69145	GR18_3.1.trim3	4535	0	476	0.104961		-0.119693	0.244189	GR18_3		GR18_3.1.trim3	57	GR18_3.1.trim3	1691	65.7735	GR18_3.1.trim3	1691	0	258
GR18_4	GRE	F	Mt Parnassus	Mt Parnassus (local 29; pop GR18)	38.5784	22.5751	Eduardo Marabuto, Ana Sofia Rodrigues, Sara Silva	2011-06-18				YES	SbfIC	57	TCCTC		4600140	135137	305654	4159349	90.4179	YES		GR18_4	SbfIC_trim3_masmiss080_maxmeanDP200.het	GR18_4.1.trim3	1807	1515.4	2001	0.60049	GR18_4.1.trim3	2188	0	187	0.0854662		0.304642	0.0255972	GR18_4		GR18_4.1.trim3	58	GR18_4.1.trim3	1691	133.792	GR18_4.1.trim3	1691	0	156
GR18_5	GRE	F	Mt Parnassus	Mt Parnassus (local 29; pop GR18)	38.5784	22.5751	Eduardo Marabuto, Ana Sofia Rodrigues, Sara Silva	2011-06-18				YES	SbfIC	56	TCTCT		2400344	151994	164081	2084269	86.8321	YES		GR18_5	SbfIC_trim3_masmiss080_maxmeanDP200.het	GR18_5.1.trim3	1772	1426.1	1878	0.76545	GR18_5.1.trim3	2188	0	310	0.141682		0.284747	0.0314803	GR18_5		GR18_5.1.trim3	59	GR18_5.1.trim3	1691	65.6121	GR18_5.1.trim3	1691	0	342
GR18_6	GRE	F	Mt Parnassus	Mt Parnassus (local 29; pop GR18)	38.5784	22.5751	Eduardo Marabuto, Ana Sofia Rodrigues, Sara Silva	2011-06-18				YES	SbfIC	55	TGCAA		2187868	67113	151402	1969353	90.0124	YES		GR18_6	SbfIC_trim3_masmiss080_maxmeanDP200.het	GR18_6.1.trim3	1626	1449.6	1908	0.38482	GR18_6.1.trim3	2188	0	280	0.127971		0.234265	0.0594438	GR18_6		GR18_6.1.trim3	60	GR18_6.1.trim3	1691	59.9746	GR18_6.1.trim3	1691	0	269
GR18_7	GRE	F	Mt Parnassus	Mt Parnassus (local 29; pop GR18)	38.5784	22.5751	Eduardo Marabuto, Ana Sofia Rodrigues, Sara Silva	2011-06-18				YES	SbfIC	54	TGTGG		2732446	84136	174537	2473773	90.5333	YES		GR18_7	SbfIC_trim3_masmiss080_maxmeanDP200.het	GR18_7.1.trim3	1812	1477.9	1952	0.70469	GR18_7.1.trim3	2188	0	236	0.107861		0.315674	0.0345511	GR18_7		GR18_7.1.trim3	61	GR18_7.1.trim3	1691	83.6765	GR18_7.1.trim3	1691	0	254
GR18_8	GRE	F	Mt Parnassus	Mt Parnassus (local 29; pop GR18)	38.5784	22.5751	Eduardo Marabuto, Ana Sofia Rodrigues, Sara Silva	2011-06-18				YES	SbfIC	53	TTCCG		2242338	55726	151103	2035509	90.7762	YES		GR18_8	SbfIC_trim3_masmiss080_maxmeanDP200.het	GR18_8.1.trim3	1764	1428.9	1884	0.73632	GR18_8.1.trim3	2188	0	304	0.13894		0.315408	0.0262464	GR18_8		GR18_8.1.trim3	62	GR18_8.1.trim3	1691	65.9148	GR18_8.1.trim3	1691	0	330
GR18_1	GRE	F	Mt Parnassus	Mt Parnassus (local 29; pop GR18)	38.5784	22.5751	Eduardo Marabuto, Ana Rodrigues, Sara Silva, Rui Nunes e Luis Ferreira	2011-06-18	YES	eastern-Med	H46	YES	SbfIB	31	GTTGT		1112210	186462	71868	853880	76.7733	OUT		GR18_1	SbfIB_trim3_masmiss080_maxmeanDP200.het	GR18_1.1.trim3	2699	2142.3	2804	0.84132	GR18_1.1.trim3	4535	0	1731	0.381698		-0.0730334	0.144613
GR18_10	GRE	M	Mt Parnassus	Mt Parnassus (local 29; pop GR18)	38.5784	22.5751	Eduardo Marabuto, Ana Rodrigues, Sara Silva, Rui Nunes e Luis Ferreira	2011-06-18				YES	SbfIA	6	GCGCC		721176	17419	354593	349164	48.4159	OUT
GR18_11	GRE	M	Mt Parnassus	Mt Parnassus (local 29; pop GR18)	38.5784	22.5751	Eduardo Marabuto, Ana Rodrigues, Sara Silva, Rui Nunes e Luis Ferreira	2011-06-18				YES	SbfIA	7	GGAAG		308694	22760	143938	141996	45.999	OUT
GR18_9	GRE	F	Mt Parnassus	Mt Parnassus (local 29; pop GR18)	38.5784	22.5751	Eduardo Marabuto, Ana Rodrigues, Sara Silva, Rui Nunes e Luis Ferreira	2011-06-18				YES	SbfIA	5	GCATT		486754	72410	222624	191720	39.3875	OUT
MR10_1	MOR	Nymph	Ifrane Centre	Marrocos, Ifrane Centre	33.533	-5.10218	Eduardo Marabuto, Ana Sofia Rodrigues, Sara Silva e Luis Ferreira	May.2011	YES	western	H37	YES	SbfIB	40	AGCTG		4103072	125552	422061	3555459	86.6536	YES		MR10_1	SbfIB_trim3_masmiss080_maxmeanDP200.het	MR10_1.1.trim3	3850	3044.9	3976	0.86467	MR10_1.1.trim3	4535	0	559	0.123264		0.536268	0.171984	MR10_1		MR10_1.1.trim3	63	MR10_1.1.trim3	1691	77.3318	MR10_1.1.trim3	1691	0	166
MR11_1	MOR	Nymph	Azrou	Marrocos, Azrou	33.4494	-5.23198	Eduardo Marabuto, Ana Sofia Rodrigues, Sara Silva e Luis Ferreira	May.2011	YES	western	H29	YES	SbfIC	28	AGAGT		4961218	217611	374207	4369400	88.0711	YES		MR11_1	SbfIC_trim3_masmiss080_maxmeanDP200.het	MR11_1.1.trim3	1871	1460.5	1925	0.88376	MR11_1.1.trim3	2188	0	263	0.120201		0.0317817	-0.434663	MR11_1		MR11_1.1.trim3	64	MR11_1.1.trim3	1691	118.725	MR11_1.1.trim3	1691	0	72
MR3_1	MOR	F	Rabat	Marrocos, Rabat	34.0116	-6.70915	Eduardo Marabuto, Ana Sofia Rodrigues, Sara Silva e Luis Ferreira	May.2011	YES	western	H29	YES	SbfIA	54	TATAC		5012688	122617	232457	4657614	92.9165	YES		MR3_1	SbfIA_trim3_masmiss055_maxmeanDP200.het	MR3_1.1.trim3	1186	938.2	1220	0.87936	MR3_1.1.trim3	2686	0	288	0.107223		0.0806551	0.10578	MR3_1		MR3_1.1.trim3	65	MR3_1.1.trim3	1691	153.692	MR3_1.1.trim3	1691	0	75
MR6_1	MOR	M	Rif	Marrocos, Rif	35.8661	-5.40842	Eduardo Marabuto, Ana Sofia Rodrigues, Sara Silva e Luis Ferreira	May.2011	YES	western	H29	YES	SbfIB	1	CGATA		4874938	86470	293499	4494969	92.2057	YES		MR6_1	SbfIB_trim3_masmiss080_maxmeanDP200.het	MR6_1.1.trim3	4036	3205.3	4191	0.84275	MR6_1.1.trim3	4535	0	344	0.0758545		0.535586	0.179105	MR6_1		MR6_1.1.trim3	66	MR6_1.1.trim3	1691	126.312	MR6_1.1.trim3	1691	0	98
MR7	MOR	Nymph	Azrou	Marrocos, Azrou	33.4494	-5.23198	Eduardo Marabuto, Ana Sofia Rodrigues, Sara Silva e Luis Ferreira	May.2011	YES	western	H29	YES	SbfIC	37	GGCCT		5139318	195960	472749	4470609	86.9884	YES		MR7	SbfIC_trim3_masmiss080_maxmeanDP200.het	MR7.1.trim3	1677	1300.4	1711	0.9172	MR7.1.trim3	2188	0	477	0.218007		0.029865	-0.420894	MR7		MR7.1.trim3	67	MR7.1.trim3	1691	62.6813	MR7.1.trim3	1691	0	352
MR9_1	MOR	Nymph	Ifrane	Marrocos, Ifrane	33.5116	-5.0928	Eduardo Marabuto, Ana Sofia Rodrigues, Sara Silva e Luis Ferreira	May.2011	YES	western	H37	YES	SbfIB	41	CTTCC		2884882	80310	295030	2509542	86.9894	YES		MR9_1	SbfIB_trim3_masmiss080_maxmeanDP200.het	MR9_1.1.trim3	3621	2850.6	3720	0.88613	MR9_1.1.trim3	4535	0	815	0.179713		0.493673	0.161492	MR9_1		MR9_1.1.trim3	68	MR9_1.1.trim3	1691	53.2762	MR9_1.1.trim3	1691	0	308
MR2_1	MOR	F	near Rabat	Marrocos, near Rabat			Eduardo Marabuto, Ana Sofia Rodrigues, Sara Silva e Luis Ferreira	May.2011	YES	western	H28	YES	SbfIA	27	AGAGT		1703982	107462	812648	783872	46.0024	OUT		MR2_1	SbfIA_trim3_masmiss055_maxmeanDP200.het	MR2_1.1.trim3	227	179.6	231	0.9222	MR2_1.1.trim3	2686	0	2208	0.82204		-0.018953	0.0282015
Mar2.1	MOR	M	near Rabat				Eduardo Marabuto, Ana Sofia Rodrigues, Sara Silva e Luis Ferreira	May.2011
Mar2.2	MOR	M	near Rabat				Eduardo Marabuto, Ana Sofia Rodrigues, Sara Silva e Luis Ferreira	May.2011
Mar6.2	MOR	M	Rif	Marrocos, Rif	35.8661	-5.40842	Eduardo Marabuto, Ana Sofia Rodrigues, Sara Silva e Luis Ferreira	May.2011
Sint10	POR	M	Fontanelas, Sintra		38.8377	-9.42244	Ana Sofia Rodrigues, Sofia Seabra, Carla Pereira	2010-06-24				YES	SbfIC	4	GAAGC		5425186	1014393	322361	4088432	75.3602	YES		Sint10	SbfIC_trim3_masmiss080_maxmeanDP200.het	Sint10.1.trim3	1760	1551.7	2041	0.42571	Sint10.1.trim3	2188	0	147	0.0671846		-0.0472175	-0.152938	Sint10		Sint10.1.trim3	69	Sint10.1.trim3	1691	69.3542	Sint10.1.trim3	1691	0	101
Sint11	POR	M	Fontanelas, Sintra		38.8377	-9.42244	Ana Sofia Rodrigues, Sofia Seabra, Carla Pereira	2010-06-24				YES	SbfIC	42	AGTCA		3346184	461920	206272	2677992	80.0312	YES		Sint11	SbfIC_trim3_masmiss080_maxmeanDP200.het	Sint11.1.trim3	1700	1411.2	1857	0.64785	Sint11.1.trim3	2188	0	331	0.15128		-0.0411749	-0.129812	Sint11		Sint11.1.trim3	70	Sint11.1.trim3	1691	60.6387	Sint11.1.trim3	1691	0	348
Sint14	POR	M	Fontanelas, Sintra		38.8377	-9.42244	Ana Sofia Rodrigues, Sofia Seabra, Carla Pereira	2010-06-24	YES	western	H29	YES	SbfIB	46	CCCCA		2242836	114563	181584	1946689	86.7959	YES		Sint14	SbfIB_trim3_masmiss080_maxmeanDP200.het	Sint14.1.trim3	3658	3054.8	3989	0.64567	Sint14.1.trim3	4535	0	546	0.120397		0.042335	-0.0622149	Sint14		Sint14.1.trim3	71	Sint14.1.trim3	1691	58.0645	Sint14.1.trim3	1691	0	293
Sint15	POR	M	Fontanelas, Sintra		38.8377	-9.42244	Ana Sofia Rodrigues, Sofia Seabra, Carla Pereira	2010-06-24				YES	SbfIB	45	CCTTG		2776878	99466	246976	2430436	87.524	YES		Sint15	SbfIB_trim3_masmiss080_maxmeanDP200.het	Sint15.1.trim3	3681	3120	4077	0.58621	Sint15.1.trim3	4535	0	458	0.100992		0.0676302	-0.0551084	Sint15		Sint15.1.trim3	72	Sint15.1.trim3	1691	73.8273	Sint15.1.trim3	1691	0	196
Sint16	POR	M	Fontanelas, Sintra		38.8377	-9.42244	Ana Sofia Rodrigues, Sofia Seabra, Carla Pereira	2010-06-24				YES	SbfIC	32	ATTAG		6855816	382357	456933	6016526	87.758	YES		Sint16	SbfIC_trim3_masmiss080_maxmeanDP200.het	Sint16.1.trim3	1807	1556.8	2051	0.50626	Sint16.1.trim3	2188	0	137	0.0626143		-0.0567646	-0.111512	Sint16		Sint16.1.trim3	73	Sint16.1.trim3	1691	178.356	Sint16.1.trim3	1691	0	129
Sint17	POR	M	Fontanelas, Sintra		38.8377	-9.42244	Ana Sofia Rodrigues, Sofia Seabra, Carla Pereira	2010-06-24				YES	SbfIB	44	CGCGC		5407952	124259	390224	4893469	90.4865	YES		Sint17	SbfIB_trim3_masmiss080_maxmeanDP200.het	Sint17.1.trim3	3759	3236	4229	0.5267	Sint17.1.trim3	4535	0	306	0.0674752		0.0363997	-0.0686778	Sint17		Sint17.1.trim3	74	Sint17.1.trim3	1691	161.802	Sint17.1.trim3	1691	0	93
Sint18	POR	F	Fontanelas, Sintra		38.8377	-9.42244	Ana Sofia Rodrigues, Sofia Seabra, Carla Pereira	2010-06-24	YES	western	H36	YES	SbfIB	43	CGTAT		3882690	92840	320424	3469426	89.3562	YES		Sint18	SbfIB_trim3_masmiss080_maxmeanDP200.het	Sint18.1.trim3	3742	3218.5	4209	0.52853	Sint18.1.trim3	4535	0	326	0.0718853		0.0749186	-0.0542642	Sint18		Sint18.1.trim3	75	Sint18.1.trim3	1691	108.527	Sint18.1.trim3	1691	0	121
Sint19	POR	F	Fontanelas, Sintra		38.8377	-9.42244	Ana Sofia Rodrigues, Sofia Seabra, Carla Pereira	2010-06-24				YES	SbfIB	42	CTCTT		2984574	163797	262774	2558003	85.7075	YES		Sint19	SbfIB_trim3_masmiss080_maxmeanDP200.het	Sint19.1.trim3	3744	3142.3	4101	0.62763	Sint19.1.trim3	4535	0	434	0.0957001		0.0392618	-0.06446	Sint19		Sint19.1.trim3	76	Sint19.1.trim3	1691	74.1118	Sint19.1.trim3	1691	0	217
Sint2	POR	M	Fontanelas, Sintra		38.8377	-9.42244	Ana Sofia Rodrigues, Sofia Seabra, Carla Pereira	2010-06-24				YES	SbfIC	1	CGATA		1140398	186079	70622	883697	77.4902	YES		Sint2	SbfIC_trim3_masmiss080_maxmeanDP200.het	Sint2.1.trim3	1666	1373.8	1804	0.6792	Sint2.1.trim3	2188	0	384	0.175503		-0.0523154	-0.134847	Sint2		Sint2.1.trim3	77	Sint2.1.trim3	1691	17.3057	Sint2.1.trim3	1691	0	626
Sint20	POR	F	Fontanelas, Sintra		38.8377	-9.42244	Ana Sofia Rodrigues, Sofia Seabra, Carla Pereira	2010-06-24				YES	SbfIC	33	ATCGA		2511308	82413	172754	2256141	89.8393	YES		Sint20	SbfIC_trim3_masmiss080_maxmeanDP200.het	Sint20.1.trim3	1747	1438.7	1894	0.67711	Sint20.1.trim3	2188	0	294	0.134369		-0.0499825	-0.178481	Sint20		Sint20.1.trim3	78	Sint20.1.trim3	1691	72.3631	Sint20.1.trim3	1691	0	296
Sint21	POR		Fontanelas, Sintra		38.8377	-9.42244	Ana Sofia Rodrigues, Sofia Seabra, Carla Pereira	2010-06-24				YES	SbfIC	40	GATCG		2859092	51925	188437	2618730	91.5931	YES		Sint21	SbfIC_trim3_masmiss080_maxmeanDP200.het	Sint21.1.trim3	1782	1482.3	1951	0.63946	Sint21.1.trim3	2188	0	237	0.108318		-0.0524704	-0.134672	Sint21		Sint21.1.trim3	79	Sint21.1.trim3	1691	85.1005	Sint21.1.trim3	1691	0	220
Sint22	POR		Fontanelas, Sintra		38.8377	-9.42244	Ana Sofia Rodrigues, Sofia Seabra, Carla Pereira	2010-06-24				YES	SbfIC	39	GCCGG		9081432	83336	608609	8389487	92.3807	YES		Sint22	SbfIC_trim3_masmiss080_maxmeanDP200.het	Sint22.1.trim3	1753	1560.9	2053	0.39042	Sint22.1.trim3	2188	0	135	0.0617002		-0.0527946	-0.143247	Sint22		Sint22.1.trim3	80	Sint22.1.trim3	1691	287.003	Sint22.1.trim3	1691	0	91
Sint23	POR		Fontanelas, Sintra		38.8377	-9.42244	Ana Sofia Rodrigues, Sofia Seabra, Carla Pereira	2010-06-24	YES	western	H37	YES	SbfIC	38	GCTAA		2149820	109262	155791	1884767	87.6709	YES		Sint23	SbfIC_trim3_masmiss080_maxmeanDP200.het	Sint23.1.trim3	1685	1370.4	1808	0.71889	Sint23.1.trim3	2188	0	380	0.173675		-0.0502754	-0.131933	Sint23		Sint23.1.trim3	81	Sint23.1.trim3	1691	59.712	Sint23.1.trim3	1691	0	414
Sint24	POR	M	Fontanelas, Sintra		38.8377	-9.42244	Ana Sofia Rodrigues, Sofia Seabra, Carla Pereira	2010-06-24				YES	SbfIC	36	GGTTC		2326556	54485	150605	2121466	91.1848	YES		Sint24	SbfIC_trim3_masmiss080_maxmeanDP200.het	Sint24.1.trim3	1762	1445.8	1905	0.68857	Sint24.1.trim3	2188	0	283	0.129342		-0.0398149	-0.119077	Sint24		Sint24.1.trim3	82	Sint24.1.trim3	1691	68.7907	Sint24.1.trim3	1691	0	313
Sint25	POR	M	Fontanelas, Sintra		38.8377	-9.42244	Ana Sofia Rodrigues, Sofia Seabra, Carla Pereira	2010-06-24	YES	western	H29	YES	SbfIC	35	GTCAC		1858822	51354	125005	1682463	90.5123	YES		Sint25	SbfIC_trim3_masmiss080_maxmeanDP200.het	Sint25.1.trim3	1652	1329.2	1754	0.75987	Sint25.1.trim3	2188	0	434	0.198355		0.277369	0.0343413	Sint25		Sint25.1.trim3	83	Sint25.1.trim3	1691	55.6263	Sint25.1.trim3	1691	0	439
Sint26	POR	M	Fontanelas, Sintra		38.8377	-9.42244	Ana Sofia Rodrigues, Sofia Seabra, Carla Pereira	2010-06-24				YES	SbfIC	34	GTTGT		4167366	112784	268070	3786512	90.861	YES		Sint26	SbfIC_trim3_masmiss080_maxmeanDP200.het	Sint26.1.trim3	1800	1531.9	2016	0.55385	Sint26.1.trim3	2188	0	172	0.0786106		-0.048608	-0.152952	Sint26		Sint26.1.trim3	84	Sint26.1.trim3	1691	124.921	Sint26.1.trim3	1691	0	182
Sint3	POR	M	Fontanelas, Sintra		38.8377	-9.42244	Ana Sofia Rodrigues, Sofia Seabra, Carla Pereira	2010-06-24				YES	SbfIC	2	CGGCG		4652806	1280388	239352	3133066	67.3371	YES		Sint3	SbfIC_trim3_masmiss080_maxmeanDP200.het	Sint3.1.trim3	1745	1510.3	1985	0.4944	Sint3.1.trim3	2188	0	203	0.0927788		-0.0530113	-0.116886	Sint3		Sint3.1.trim3	85	Sint3.1.trim3	1691	39.288	Sint3.1.trim3	1691	0	231
P01	POR	M	Fontanelas, Sintra		38.8377	-9.42244	Ana Sofia Rodrigues, Sofia Seabra, Carla Pereira	24.06.2010
P02	POR	M	Fontanelas, Sintra		39.8377	-8.42244	Ana Sofia Rodrigues, Sofia Seabra, Carla Pereira	24.06.2010
P03	POR	M	Fontanelas, Sintra		40.8377	-7.42244	Ana Sofia Rodrigues, Sofia Seabra, Carla Pereira	24.06.2010
Sint-TYP	POR	M	Fontanelas, Sintra		38.8377	-9.42244	Ana Sofia Rodrigues, Sofia Seabra, Carla Pereira	24.06.2010
Sint1	POR	F	Fontanelas, Sintra		38.8377	-9.42244	Ana Sofia Rodrigues, Sofia Seabra, Carla Pereira	24.06.2010				YES	SbfIB	39	AGTCA		2052158	399635	168927	1483596	72.2944	OUT		Sint1	SbfIB_trim3_masmiss080_maxmeanDP200.het	Sint1.1.trim3	3098	2522.4	3294	0.74597	Sint1.1.trim3	4535	0	1241	0.273649		0.0308156	-0.037655
Sint13	POR	M	Fontanelas, Sintra		38.8377	-9.42244	Ana Sofia Rodrigues, Sofia Seabra, Carla Pereira	24.06.2010				YES	SbfIC	41	GACTA		1415492	70213	101559	1243720	87.8649	OUT		Sint13	SbfIC_trim3_masmiss080_maxmeanDP200.het	Sint13.1.trim3	1452	1169.8	1534	0.77484	Sint13.1.trim3	2188	0	654	0.298903		-0.027704	-0.106424
Sint4	POR	M	Fontanelas, Sintra		38.8377	-9.42244	Ana Sofia Rodrigues, Sofia Seabra, Carla Pereira	24.06.2010				YES	SbfIC	3	CTAGG		3673680	1031438	170987	2471255	67.2692	OUT		Sint4	SbfIC_trim3_masmiss080_maxmeanDP200.het	Sint4.1.trim3	797	633	834	0.81591	Sint4.1.trim3	2188	0	1354	0.61883		-0.0172933	-0.0552997
Sint5	POR	M	Fontanelas, Sintra		38.8377	-9.42244	Ana Sofia Rodrigues, Sofia Seabra, Carla Pereira	24.06.2010
Turk10	TUR	M	Cerkes		40.8165	32.9026	Selcuk Yurtsever	2010				YES	SbfIC	49	CCCCA		10544610	1669947	614055	8260608	78.3396	YES		Turk10	SbfIC_trim3_masmiss080_maxmeanDP200.het	Turk10.1.trim3	1807	1545.3	2037	0.53221	Turk10.1.trim3	2188	0	151	0.0690128		0.193186	0.0601429	Turk10		Turk10.1.trim3	86	Turk10.1.trim3	1691	191.121	Turk10.1.trim3	1691	0	124
Turk15	TUR	F	Cerkes		40.8165	32.9026	Selcuk Yurtsever	2010				YES	SbfIA	40	CTTCC		7184528	104357	282089	6798082	94.6211	YES		Turk15	SbfIA_trim3_masmiss055_maxmeanDP200.het	Turk15.1.trim3	1098	986.2	1281	0.37916	Turk15.1.trim3	2686	0	167	0.0621742		0.316196	0.0208185	Turk15		Turk15.1.trim3	87	Turk15.1.trim3	1691	217.164	Turk15.1.trim3	1691	0	104
Turk16	TUR	M	Cerkes		40.8165	32.9026	Selcuk Yurtsever	2010				YES	SbfIA	41	CTCTT		3876564	100897	165743	3609924	93.1217	YES		Turk16	SbfIA_trim3_masmiss055_maxmeanDP200.het	Turk16.1.trim3	1114	987.2	1286	0.42446	Turk16.1.trim3	2686	0	159	0.0591958		0.360031	0.0147613	Turk16		Turk16.1.trim3	88	Turk16.1.trim3	1691	122.251	Turk16.1.trim3	1691	0	114
Turk17	TUR	F	Cerkes		40.8165	32.9026	Selcuk Yurtsever	2010				YES	SbfIA	55	TACGT		2574430	358936	262540	1952954	75.8597	YES		Turk17	SbfIA_trim3_masmiss055_maxmeanDP200.het	Turk17.1.trim3	1036	987.1	1283	0.16524	Turk17.1.trim3	2686	0	137	0.0510052		0.35548	-0.090067	Turk17		Turk17.1.trim3	89	Turk17.1.trim3	1691	48.4311	Turk17.1.trim3	1691	0	177
Turk18	TUR	M	Cerkes		40.8165	32.9026	Selcuk Yurtsever	2010				YES	SbfIB	51	TGTGG		3235760	128991	234821	2871948	88.7565	YES		Turk18	SbfIB_trim3_masmiss080_maxmeanDP200.het	Turk18.1.trim3	3782	3159.7	4131	0.64068	Turk18.1.trim3	4535	0	404	0.0890849		-0.0877839	0.156319	Turk18		Turk18.1.trim3	90	Turk18.1.trim3	1691	91.7995	Turk18.1.trim3	1691	0	189
Turk19	TUR	M	Cerkes		40.8165	32.9026	Selcuk Yurtsever	2010				YES	SbfIA	42	CGTAT		3849534	123353	236544	3489637	90.6509	YES		Turk19	SbfIA_trim3_masmiss055_maxmeanDP200.het	Turk19.1.trim3	1116	999.4	1302	0.38524	Turk19.1.trim3	2686	0	122	0.0454207		0.304042	-0.0233027	Turk19		Turk19.1.trim3	91	Turk19.1.trim3	1691	119.351	Turk19.1.trim3	1691	0	88
Turk20	TUR	F	Cerkes		40.8165	32.9026	Selcuk Yurtsever	2010				YES	SbfIB	19	TTGGC		2910624	95448	124039	2691137	92.4591	YES		Turk20	SbfIB_trim3_masmiss080_maxmeanDP200.het	Turk20.1.trim3	3675	3186	4160	0.50206	Turk20.1.trim3	4535	0	375	0.0826902		-0.0879084	0.134407	Turk20		Turk20.1.trim3	92	Turk20.1.trim3	1691	86.4873	Turk20.1.trim3	1691	0	132
Turk21	TUR	M	Cerkes		40.8165	32.9026	Selcuk Yurtsever	2010				YES	SbfIB	18	TTAAT		5267838	400662	280125	4587051	87.0765	YES		Turk21	SbfIB_trim3_masmiss080_maxmeanDP200.het	Turk21.1.trim3	3767	3197.7	4182	0.57839	Turk21.1.trim3	4535	0	353	0.077839		-0.0875758	0.151079	Turk21		Turk21.1.trim3	93	Turk21.1.trim3	1691	135.745	Turk21.1.trim3	1691	0	105
Turk22	TUR	M	Cerkes		40.8165	32.9026	Selcuk Yurtsever	2010				YES	SbfIB	17	TGGTT		3834082	336324	350236	3147522	82.0932	YES		Turk22	SbfIB_trim3_masmiss080_maxmeanDP200.het	Turk22.1.trim3	3734	3113.3	4069	0.64946	Turk22.1.trim3	4535	0	466	0.102756		-0.0184632	-0.11877	Turk22		Turk22.1.trim3	94	Turk22.1.trim3	1691	61.2975	Turk22.1.trim3	1691	0	259
Turk23	TUR		Cerkes		40.8165	32.9026	Selcuk Yurtsever	2010				YES	SbfIB	16	TGACC		4524418	234107	214074	4076237	90.0942	YES		Turk23	SbfIB_trim3_masmiss080_maxmeanDP200.het	Turk23.1.trim3	3726	3171	4140	0.57274	Turk23.1.trim3	4535	0	395	0.0871003		-0.0931576	0.155121	Turk23		Turk23.1.trim3	95	Turk23.1.trim3	1691	117.118	Turk23.1.trim3	1691	0	114
Turk5	TUR	M	Cerkes		40.8165	32.9026	Selcuk Yurtsever	2010	YES	north-eastern	H4	YES	SbfIC	17	TGGTT		2610880	150227	173758	2286895	87.591	YES		Turk5	SbfIC_trim3_masmiss080_maxmeanDP200.het	Turk5.1.trim3	1794	1443.5	1904	0.76114	Turk5.1.trim3	2188	0	284	0.129799		-0.0881638	0.220496	Turk5		Turk5.1.trim3	96	Turk5.1.trim3	1691	64.5588	Turk5.1.trim3	1691	0	337
Turk6	TUR	M	Cerkes		40.8165	32.9026	Selcuk Yurtsever	2010	YES	north-eastern	H6	YES	SbfIC	18	TTAAT		3339294	349289	226989	2763016	82.7425	YES		Turk6	SbfIC_trim3_masmiss080_maxmeanDP200.het	Turk6.1.trim3	1810	1559.5	2051	0.50965	Turk6.1.trim3	2188	0	137	0.0626143		0.179523	0.0660839	Turk6		Turk6.1.trim3	97	Turk6.1.trim3	1691	73.741	Turk6.1.trim3	1691	0	129
Turk7	TUR		Cerkes		40.8165	32.9026	Selcuk Yurtsever	2010	YES	north-eastern	H6	YES	SbfIC	19	TTGGC		2607218	84573	175054	2347591	90.042	YES		Turk7	SbfIC_trim3_masmiss080_maxmeanDP200.het	Turk7.1.trim3	1784	1546.6	2041	0.48016	Turk7.1.trim3	2188	0	147	0.0671846		0.180411	0.0659755	Turk7		Turk7.1.trim3	98	Turk7.1.trim3	1691	67.5665	Turk7.1.trim3	1691	0	116
Turk8	TUR		Cerkes		40.8165	32.9026	Selcuk Yurtsever	2010	YES	north-eastern	H11	YES	SbfIC	20	AACCC		28560156	2929378	1832630	23798148	83.3264	YES		Turk8	SbfIC_trim3_masmiss080_maxmeanDP200.het	Turk8.1.trim3	1728	1503.9	1982	0.4687	Turk8.1.trim3	2188	0	206	0.0941499		0.159513	0.0445818	Turk8		Turk8.1.trim3	99	Turk8.1.trim3	1691	420.734	Turk8.1.trim3	1691	0	103
Turk9	TUR		Cerkes		40.8165	32.9026	Selcuk Yurtsever	2010				YES	SbfIC	50	CATGA		2936242	111114	220506	2604622	88.706	YES		Turk9	SbfIC_trim3_masmiss080_maxmeanDP200.het	Turk9.1.trim3	1729	1404.1	1852	0.72538	Turk9.1.trim3	2188	0	336	0.153565		0.220564	0.0621776	Turk9		Turk9.1.trim3	100	Turk9.1.trim3	1691	66.1342	Turk9.1.trim3	1691	0	342
Turk11	TUR	F	Cerkes		40.8165	32.9026	Selcuk Yurtsever	2010				YES	SbfIA	12	TAGCA		3692106	69428	1861646	1761032	47.6972	OUT		Turk11	SbfIA_trim3_masmiss055_maxmeanDP200.het	Turk11.1.trim3	101	77.1	102	0.95987	Turk11.1.trim3	2686	0	2479	0.922934		0.0176549	-0.00131034
Turk12	TUR	F	Cerkes		40.8165	32.9026	Selcuk Yurtsever	2010				YES	SbfIA	13	TCAGA		3648202	198232	1788060	1661910	45.5542	OUT		Turk12	SbfIA_trim3_masmiss055_maxmeanDP200.het	Turk12.1.trim3	268	213.9	279	0.83098	Turk12.1.trim3	2686	0	2127	0.791884		0.00432078	0.00544361
Turk13	TUR	F	Cerkes		40.8165	32.9026	Selcuk Yurtsever	2010				YES	SbfIA	14	TCGAG		4318008	180096	2152170	1985742	45.9875	OUT		Turk13	SbfIA_trim3_masmiss055_maxmeanDP200.het	Turk13.1.trim3	183	141.7	183	1	Turk13.1.trim3	2686	0	2298	0.855547		-0.000463789	0.0131893
Turk14	TUR	F	Cerkes		40.8165	32.9026	Selcuk Yurtsever	2010				YES	SbfIA	15	TGACC		2744428	68270	1373470	1302688	47.4666	OUT		Turk14	SbfIA_trim3_masmiss055_maxmeanDP200.het	Turk14.1.trim3	66	51.5	66	1	Turk14.1.trim3	2686	0	2535	0.943783		0.00970762	0.00183364
Turk2	TUR	M	Cerkes		40.8165	32.9026	Selcuk Yurtsever	2010
Turk4	TUR	M	Cerkes		40.8165	32.9026	Selcuk Yurtsever	2010				YES	SbfIB	35	GCTAA		1441010	167790	115973	1157247	80.308	OUT		Turk4	SbfIB_trim3_masmiss080_maxmeanDP200.het	Turk4.1.trim3	3075	2514.8	3283	0.72923	Turk4.1.trim3	4535	0	1252	0.276075		-0.0588397	0.0662548
UK1	UK	M	Aberdare, Wales		51.7136	-3.44535	Mike Wilson	June.2010				YES	SbfIB	36	GCCGG		2543958	143128	171641	2229189	87.6268	YES		UK1	SbfIB_trim3_masmiss080_maxmeanDP200.het	UK1.1.trim3	3556	2930.5	3832	0.69386	UK1.1.trim3	4535	0	703	0.155017		-0.0228565	-0.0986992	UK1		UK1.1.trim3	101	UK1.1.trim3	1691	49.8202	UK1.1.trim3	1691	0	319
UK12	UK	M	Aberdare, Wales		51.7136	-3.44535	Mike Wilson	June.2010				YES	SbfIA	47	CACAG		3753364	193562	156617	3403185	90.6703	YES		UK12	SbfIA_trim3_masmiss055_maxmeanDP200.het	UK12.1.trim3	1118	1004.5	1306	0.37646	UK12.1.trim3	2686	0	103	0.038347		-0.111339	0.0658781	UK12		UK12.1.trim3	102	UK12.1.trim3	1691	101.671	UK12.1.trim3	1691	0	97
UK13	UK	F	Aberdare, Wales		51.7136	-3.44535	Mike Wilson	June.2010				YES	SbfIA	48	TTTTA		6032538	471763	252052	5308723	88.0015	YES		UK13	SbfIA_trim3_masmiss055_maxmeanDP200.het	UK13.1.trim3	1083	1003.9	1306	0.26176	UK13.1.trim3	2686	0	113	0.04207		-0.103764	0.0526699	UK13		UK13.1.trim3	103	UK13.1.trim3	1691	152.549	UK13.1.trim3	1691	0	92
UK14	UK	F	Aberdare, Wales		51.7136	-3.44535	Mike Wilson	June.2010				YES	SbfIA	49	TTCCG		6161590	301256	247189	5613145	91.099	YES		UK14	SbfIA_trim3_masmiss055_maxmeanDP200.het	UK14.1.trim3	1094	1002.4	1303	0.30475	UK14.1.trim3	2686	0	106	0.0394639		-0.122583	0.0212923	UK14		UK14.1.trim3	104	UK14.1.trim3	1691	168.412	UK14.1.trim3	1691	0	85
UK15	UK	F	Aberdare, Wales		51.7136	-3.44535	Mike Wilson	June.2010	YES	north-eastern	H13/H16+1subst	YES	SbfIA	50	TGTGG		4329938	201369	146227	3982342	91.9723	YES		UK15	SbfIA_trim3_masmiss055_maxmeanDP200.het	UK15.1.trim3	1117	1015.5	1322	0.33113	UK15.1.trim3	2686	0	80	0.0297841		-0.0984268	-0.0133069	UK15		UK15.1.trim3	105	UK15.1.trim3	1691	128.185	UK15.1.trim3	1691	0	66
UK16	UK	F	Aberdare, Wales		51.7136	-3.44535	Mike Wilson	June.2010				YES	SbfIB	10	GTACA		20135748	918599	1008649	18208500	90.4287	YES		UK16	SbfIB_trim3_masmiss080_maxmeanDP200.het	UK16.1.trim3	3298	2924.3	3808	0.42291	UK16.1.trim3	4535	0	727	0.160309		-0.019583	-0.0927551	UK16		UK16.1.trim3	106	UK16.1.trim3	1691	435.229	UK16.1.trim3	1691	0	149
UK17	UK	F	Aberdare, Wales		51.7136	-3.44535	Mike Wilson	June.2010				YES	SbfIB	9	GGGGA		7733564	693497	250534	6789533	87.7931	YES		UK17	SbfIB_trim3_masmiss080_maxmeanDP200.het	UK17.1.trim3	3630	3185.2	4157	0.4577	UK17.1.trim3	4535	0	378	0.0833517		-0.0205813	-0.10183	UK17		UK17.1.trim3	107	UK17.1.trim3	1691	167.435	UK17.1.trim3	1691	0	100
UK18	UK	M	Aberdare, Wales		51.7136	-3.44535	Mike Wilson	June.2010	YES	north-eastern	H6+1subst	YES	SbfIB	8	GGAAG		5206080	257997	233127	4714956	90.5663	YES		UK18	SbfIB_trim3_masmiss080_maxmeanDP200.het	UK18.1.trim3	3734	3252.8	4246	0.4845	UK18.1.trim3	4535	0	289	0.0637266		-0.0198603	-0.10768	UK18		UK18.1.trim3	108	UK18.1.trim3	1691	133.671	UK18.1.trim3	1691	0	118
UK19	UK	F	Aberdare, Wales		51.7136	-3.44535	Mike Wilson	June.2010				YES	SbfIB	7	GCGCC		4628512	146656	197103	4284753	92.573	YES		UK19	SbfIB_trim3_masmiss080_maxmeanDP200.het	UK19.1.trim3	3778	3280.5	4285	0.49527	UK19.1.trim3	4535	0	250	0.0551268		-0.0185014	-0.117596	UK19		UK19.1.trim3	109	UK19.1.trim3	1691	124.854	UK19.1.trim3	1691	0	93
UK2	UK	F	Aberdare, Wales		51.7136	-3.44535	Mike Wilson	June.2010				YES	SbfIC	12	TAATG		2283812	177546	151440	1954826	85.5949	YES		UK2	SbfIC_trim3_masmiss080_maxmeanDP200.het	UK2.1.trim3	1789	1554.6	2042	0.48089	UK2.1.trim3	2188	0	146	0.0667276		-0.0918637	0.054563	UK2		UK2.1.trim3	110	UK2.1.trim3	1691	50.6464	UK2.1.trim3	1691	0	158
UK22	UK	F	Aberdare, Wales		51.7136	-3.44535	Mike Wilson	June.2010				YES	SbfIB	6	GCATT		7358238	466354	345679	6546205	88.9643	YES		UK22	SbfIB_trim3_masmiss080_maxmeanDP200.het	UK22.1.trim3	3708	3247.4	4246	0.46126	UK22.1.trim3	4535	0	289	0.0637266		-0.0187803	-0.101037	UK22		UK22.1.trim3	111	UK22.1.trim3	1691	180.374	UK22.1.trim3	1691	0	108
UK3	UK	F	Aberdare, Wales		51.7136	-3.44535	Mike Wilson	June.2010				YES	SbfIC	14	TCAGA		3490726	330619	256635	2903472	83.1767	YES		UK3	SbfIC_trim3_masmiss080_maxmeanDP200.het	UK3.1.trim3	1744	1545.3	2035	0.40573	UK3.1.trim3	2188	0	153	0.0699269		-0.0900051	0.056446	UK3		UK3.1.trim3	112	UK3.1.trim3	1691	69.1774	UK3.1.trim3	1691	0	164
UK4	UK	F	Aberdare, Wales		51.7136	-3.44535	Mike Wilson	June.2010	YES	north-eastern	H13	YES	SbfIC	15	TCGAG		7119000	580800	459535	6078665	85.3865	YES		UK4	SbfIC_trim3_masmiss080_maxmeanDP200.het	UK4.1.trim3	1746	1583.4	2086	0.32347	UK4.1.trim3	2188	0	102	0.0466179		-0.0815493	0.0488867	UK4		UK4.1.trim3	113	UK4.1.trim3	1691	160.072	UK4.1.trim3	1691	0	81
UK5	UK	F	Aberdare, Wales		51.7136	-3.44535	Mike Wilson	June.2010	YES	north-eastern	H13	YES	SbfIC	16	TGACC		5797464	213006	372120	5212338	89.9072	YES		UK5	SbfIC_trim3_masmiss080_maxmeanDP200.het	UK5.1.trim3	1778	1581.7	2083	0.39155	UK5.1.trim3	2188	0	105	0.047989		-0.0786067	0.0381513	UK5		UK5.1.trim3	114	UK5.1.trim3	1691	138.773	UK5.1.trim3	1691	0	63
UK6	UK	M	Aberdare, Wales		51.7136	-3.44535	Mike Wilson	June.2010	YES	western	H24	YES	SbfIC	46	CGTAT		6812904	920848	357534	5534522	81.2359	YES		UK6	SbfIC_trim3_masmiss080_maxmeanDP200.het	UK6.1.trim3	1695	1371.4	1806	0.74458	UK6.1.trim3	2188	0	382	0.174589		-0.0628571	0.0472456	UK6		UK6.1.trim3	115	UK6.1.trim3	1691	58.0237	UK6.1.trim3	1691	0	404
UK7	UK	F	Aberdare, Wales		51.7136	-3.44535	Mike Wilson	June.2010	YES	north-eastern	H13	YES	SbfIC	45	CTCTT		9938726	539348	659843	8739535	87.9342	YES		UK7	SbfIC_trim3_masmiss080_maxmeanDP200.het	UK7.1.trim3	1758	1572.9	2068	0.37389	UK7.1.trim3	2188	0	120	0.0548446		-0.0945372	0.0594162	UK7		UK7.1.trim3	116	UK7.1.trim3	1691	234.233	UK7.1.trim3	1691	0	102
UK10	UK	M	Aberdare, Wales		51.7136	-3.44535	Mike Wilson	June.2010				YES	SbfIA	22	ACTGC		18682236	4374962	10284627	4022647	21.5319	OUT		UK10	SbfIA_trim3_masmiss055_maxmeanDP200.het	UK10.1.trim3	37	29.9	37	1	UK10.1.trim3	2686	0	2606	0.970216		-0.00204395	0.0043864
UK11	UK	F	Aberdare, Wales		51.7136	-3.44535	Mike Wilson	June.2010				YES	SbfIA	23	AAAAA		4262662	179483	2118314	1964865	46.0948	OUT		UK11	SbfIA_trim3_masmiss055_maxmeanDP200.het	UK11.1.trim3	282	220.2	286	0.93917	UK11.1.trim3	2686	0	2085	0.776247		-0.0261124	0.0220113
UK8	UK	M	Aberdare, Wales		51.7136	-3.44535	Mike Wilson	June.2010				YES	SbfIA	20	AATTT		4382800	186299	2219565	1976936	45.1067	OUT		UK8	SbfIA_trim3_masmiss055_maxmeanDP200.het	UK8.1.trim3	82	61.8	82	1	UK8.1.trim3	2686	0	2513	0.935592		-0.0020871	0.00286363
UK9	UK	F	Aberdare, Wales		51.7136	-3.44535	Mike Wilson	June.2010				YES	SbfIA	21	ACCAT		4046436	307437	1955367	1783632	44.0791	OUT		UK9	SbfIA_trim3_masmiss055_maxmeanDP200.het	UK9.1.trim3	112	84.9	112	1	UK9.1.trim3	2686	0	2455	0.913999		-0.00748013	-0.011834
USA1	USA	F	Wonalancet – New Hampshire		43.8997	-71.3593	Vinton Thompson	18/19.Jul.2010	YES	north-eastern	H9	YES	SbfIB	34	GGCCT		4877784	666563	375225	3835996	78.6422	YES		USA1	SbfIB_trim3_masmiss080_maxmeanDP200.het	USA1.1.trim3	3640	3018.7	3952	0.6657	USA1.1.trim3	4535	0	583	0.128556		-0.0173755	-0.0977478	USA1		USA1.1.trim3	117	USA1.1.trim3	1691	53.9361	USA1.1.trim3	1691	0	304
USA11	USA	M	Wonalancet – New Hampshire		43.8997	-71.3593	Vinton Thompson	18/19.Jul.2010				YES	SbfIA	51	TGCAA		7187868	248488	3104069	3835311	53.3581	YES		USA11	SbfIA_trim3_masmiss055_maxmeanDP200.het	USA11.1.trim3	1086	946.2	1231	0.49093	USA11.1.trim3	2686	0	244	0.0908414		-0.0664605	-0.0548067	USA11		USA11.1.trim3	118	USA11.1.trim3	1691	25.2241	USA11.1.trim3	1691	0	427
USA12	USA	M	Wonalancet – New Hampshire		43.8997	-71.3593	Vinton Thompson	18/19.Jul.2010	YES	north-eastern	H6+1subst	YES	SbfIA	52	TCTCT		2773466	359802	185650	2228014	80.3332	YES		USA12	SbfIA_trim3_masmiss055_maxmeanDP200.het	USA12.1.trim3	1130	975.2	1269	0.5269	USA12.1.trim3	2686	0	174	0.0647803		-0.112206	0.0761465	USA12		USA12.1.trim3	119	USA12.1.trim3	1691	34.9704	USA12.1.trim3	1691	0	271
USA13	USA	M	Wonalancet – New Hampshire		43.8997	-71.3593	Vinton Thompson	18/19.Jul.2010	YES	north-eastern	H6+1subst	YES	SbfIA	53	TCCTC		24918328	6265104	843555	17809669	71.4722	YES		USA13	SbfIA_trim3_masmiss055_maxmeanDP200.het	USA13.1.trim3	1042	958.6	1247	0.28928	USA13.1.trim3	2686	0	219	0.0815339		-0.0921941	0.0531887	USA13		USA13.1.trim3	120	USA13.1.trim3	1691	121.151	USA13.1.trim3	1691	0	75
USA14	USA	M	Wonalancet – New Hampshire		43.8997	-71.3593	Vinton Thompson	18/19.Jul.2010	YES	north-eastern	H6+1subst	YES	SbfIB	5	GAGAT		10282004	1416107	604502	8261395	80.3481	YES		USA14	SbfIB_trim3_masmiss080_maxmeanDP200.het	USA14.1.trim3	3729	3286.6	4289	0.44132	USA14.1.trim3	4535	0	246	0.0542448		-0.0218166	-0.105625	USA14		USA14.1.trim3	121	USA14.1.trim3	1691	141.035	USA14.1.trim3	1691	0	83
USA15	USA	F	Wonalancet – New Hampshire		43.8997	-71.3593	Vinton Thompson	18/19.Jul.2010				YES	SbfIB	4	GAAGC		11411394	1469294	630497	9311603	81.5992	YES		USA15	SbfIB_trim3_masmiss080_maxmeanDP200.het	USA15.1.trim3	3451	3110.2	4062	0.35808	USA15.1.trim3	4535	0	473	0.1043		0.0188647	-0.0879037	USA15		USA15.1.trim3	122	USA15.1.trim3	1691	138.041	USA15.1.trim3	1691	0	111
USA16	USA	F	Wonalancet – New Hampshire		43.8997	-71.3593	Vinton Thompson	18/19.Jul.2010				YES	SbfIB	3	CTAGG		7761718	1066487	469823	6225408	80.2066	YES		USA16	SbfIB_trim3_masmiss080_maxmeanDP200.het	USA16.1.trim3	3745	3180.6	4156	0.57862	USA16.1.trim3	4535	0	379	0.0835722		-0.0158376	-0.112719	USA16		USA16.1.trim3	123	USA16.1.trim3	1691	81.4772	USA16.1.trim3	1691	0	180
USA17	USA	F	Wonalancet – New Hampshire		43.8997	-71.3593	Vinton Thompson	18/19.Jul.2010				YES	SbfIB	2	CGGCG		5041010	583387	212072	4245551	84.2202	YES		USA17	SbfIB_trim3_masmiss080_maxmeanDP200.het	USA17.1.trim3	3277	3075.6	4017	0.21394	USA17.1.trim3	4535	0	518	0.114223		0.0787596	-0.0595487	USA17		USA17.1.trim3	124	USA17.1.trim3	1691	104.177	USA17.1.trim3	1691	0	153
USA18	USA	M	Wonalancet – New Hampshire		43.8997	-71.3593	Vinton Thompson	18/19.Jul.2010				YES	SbfIB	49	TTTTA		3804462	349023	351543	3103896	81.5857	YES		USA18	SbfIB_trim3_masmiss080_maxmeanDP200.het	USA18.1.trim3	3810	3200.4	4187	0.6179	USA18.1.trim3	4535	0	348	0.0767365		-0.0214867	-0.109438	USA18		USA18.1.trim3	125	USA18.1.trim3	1691	82.1478	USA18.1.trim3	1691	0	181
USA19	USA	M	Wonalancet – New Hampshire		43.8997	-71.3593	Vinton Thompson	18/19.Jul.2010				YES	SbfIB	48	CACAG		5573220	1121450	439612	4012158	71.9899	YES		USA19	SbfIB_trim3_masmiss080_maxmeanDP200.het	USA19.1.trim3	3744	3118.6	4071	0.65664	USA19.1.trim3	4535	0	464	0.102315		-0.0138831	-0.10597	USA19		USA19.1.trim3	126	USA19.1.trim3	1691	67.7877	USA19.1.trim3	1691	0	236
USA2	USA	F	Wonalancet – New Hampshire		43.8997	-71.3593	Vinton Thompson	18/19.Jul.2010	YES	north-eastern	H10	YES	SbfIC	21	AATTT		7901392	1639047	471088	5791257	73.2941	YES		USA2	SbfIC_trim3_masmiss080_maxmeanDP200.het	USA2.1.trim3	1749	1576.2	2076	0.34577	USA2.1.trim3	2188	0	112	0.0511883		-0.0820128	0.0144015	USA2		USA2.1.trim3	127	USA2.1.trim3	1691	105.697	USA2.1.trim3	1691	0	76
USA20	USA	F	Wonalancet – New Hampshire		43.8997	-71.3593	Vinton Thompson	18/19.Jul.2010				YES	SbfIB	47	CATGA		5422132	513481	457018	4451633	82.1012	YES		USA20	SbfIB_trim3_masmiss080_maxmeanDP200.het	USA20.1.trim3	3790	3237.7	4227	0.55827	USA20.1.trim3	4535	0	308	0.0679162		-0.0186992	-0.116042	USA20		USA20.1.trim3	128	USA20.1.trim3	1691	95.673	USA20.1.trim3	1691	0	142
USA3	USA	M	Wonalancet – New Hampshire		43.8997	-71.3593	Vinton Thompson	18/19.Jul.2010	YES	north-eastern	H3	YES	SbfIC	22	ACCAT		7138216	1308795	451936	5377485	75.3337	YES		USA3	SbfIC_trim3_masmiss080_maxmeanDP200.het	USA3.1.trim3	1800	1575.7	2076	0.44829	USA3.1.trim3	2188	0	112	0.0511883		-0.0821234	0.017007	USA3		USA3.1.trim3	129	USA3.1.trim3	1691	110.559	USA3.1.trim3	1691	0	95
USA4	USA	M	Wonalancet – New Hampshire		43.8997	-71.3593	Vinton Thompson	18/19.Jul.2010	YES	north-eastern	H1	YES	SbfIC	23	ACTGC		5870888	766132	418378	4686378	79.824	YES		USA4	SbfIC_trim3_masmiss080_maxmeanDP200.het	USA4.1.trim3	1766	1581.3	2078	0.37182	USA4.1.trim3	2188	0	110	0.0502742		-0.0863469	0.0434871	USA4		USA4.1.trim3	130	USA4.1.trim3	1691	94.7487	USA4.1.trim3	1691	0	90
USA5	USA	M	Wonalancet – New Hampshire		43.8997	-71.3593	Vinton Thompson	18/19.Jul.2010				YES	SbfIC	24	AAAAA		6932984	772238	688753	5471993	78.927	YES		USA5	SbfIC_trim3_masmiss080_maxmeanDP200.het	USA5.1.trim3	1804	1575.7	2073	0.45903	USA5.1.trim3	2188	0	115	0.0525594		-0.0774934	0.0239753	USA5		USA5.1.trim3	131	USA5.1.trim3	1691	64.945	USA5.1.trim3	1691	0	114
USA6	USA	M	Wonalancet – New Hampshire		43.8997	-71.3593	Vinton Thompson	18/19.Jul.2010				YES	SbfIC	44	CTTCC		16946076	4023420	959230	11963426	70.597	YES		USA6	SbfIC_trim3_masmiss080_maxmeanDP200.het	USA6.1.trim3	1774	1554.6	2048	0.44464	USA6.1.trim3	2188	0	140	0.0639854		-0.0891211	0.0165416	USA6		USA6.1.trim3	132	USA6.1.trim3	1691	185.52	USA6.1.trim3	1691	0	108
USA7	USA	F	Wonalancet – New Hampshire		43.8997	-71.3593	Vinton Thompson	18/19.Jul.2010				YES	SbfIC	43	AGCTG		4069176	403695	304809	3360672	82.5885	YES		USA7	SbfIC_trim3_masmiss080_maxmeanDP200.het	USA7.1.trim3	1751	1425.2	1876	0.72274	USA7.1.trim3	2188	0	312	0.142596		-0.0855277	0.0197563	USA7		USA7.1.trim3	133	USA7.1.trim3	1691	70.5352	USA7.1.trim3	1691	0	310
USA10	USA	F	Wonalancet – New Hampshire		43.8997	-71.3593	Vinton Thompson	18/19.Jul.2010				YES	SbfIA	26	ACGTA		20620376	9370439	10174032	1075905	5.21768	OUT		USA10	SbfIA_trim3_masmiss055_maxmeanDP200.het	USA10.1.trim3	39	30	39	1	USA10.1.trim3	2686	0	2603	0.969099		0.00168151	-0.0013097
USA8	USA	F	Wonalancet – New Hampshire		43.8997	-71.3593	Vinton Thompson	18/19.Jul.2010				YES	SbfIA	24	AAGGG		5546378	1330253	2775605	1440520	25.9723	OUT		USA8	SbfIA_trim3_masmiss055_maxmeanDP200.het	USA8.1.trim3	41	30.3	41	1	USA8.1.trim3	2686	0	2599	0.96761		-0.00173876	0.00054054
USA9	USA	F	Wonalancet – New Hampshire		43.8997	-71.3593	Vinton Thompson	18/19.Jul.2010				YES	SbfIA	25	ACACG		4461140	556020	2253763	1651357	37.0165	OUT		USA9	SbfIA_trim3_masmiss055_maxmeanDP200.het	USA9.1.trim3	69	52.6	70	0.94247	USA9.1.trim3	2686	0	2539	0.945272		-0.00535848	-0.00366504
[truncated: 52 more columns]

## Sheet: Table_S2a_PCA_aedeagus_lo
	Variables	PC1	PC2	PC3	PC4	PC5
TotLen	TotLen	0.441294	-0.542463	0.00382383	-0.702338	-0.133043
UpMeanLen	UpMeanLen	0.574958	0.284873	0.180786	0.273559	-0.693363
MidMeanLen	MidMeanLen	0.317802	0.0965913	-0.932451	0.101065	0.0999651
LowMeanLen	LowMeanLen	0.586131	-0.15134	0.292675	0.364755	0.644082
UpMeanCur	UpMeanCur	0.173592	0.769641	0.110354	-0.53724	0.276972

## Sheet: Table_S2b_PCA_aedeagus_6p
	Variables	PC1	PC2	PC3	PC4	PC5
TotLen	TotLen	-0.116766	0.805031	-0.285104	0.50439	0.0509561
UpMeanLen	UpMeanLen	0.598555	-0.0607356	0.0602991	0.342245	-0.719219
MidMeanLen	MidMeanLen	0.281371	0.523907	0.705616	-0.379135	0.0686676
LowMeanLen	LowMeanLen	0.454539	0.199571	-0.644482	-0.580728	0.0310513
UpMeanCur	UpMeanCur	0.585083	-0.184198	0.0427628	0.38402	0.688802

## Sheet: Table S3 8pops_mac2
				Selestim results		BayPass results							Blast with genome and transcriptome of Philaenus spumarius (Rodrigues et al., 2016)
Geste_SNP_ORDER	POS (Stacks)	ID (Stacks)	Bayescan	Selestim	KLD	BayPass	Environmental variable	BF(dB)	Environmental variable	BF(dB)	Environmental variable	BF(dB)	Original_Database_fasta_file	Blast_results_file	# Fields: query acc.ver	subject acc.ver	% identity	alignment length	mismatches	gap opens	q. start	q. end	s. start	s. end	evalue	bit score
7	13065	151				yes	Precipitation of Driest Quarter	16.6428					/home/sofia/Documents/0_Remote/blast_candidate_genes/genome_PSP/MPAX01.4.fsa_nt	out_blastn_genomePSP1.4	151	MPAX011794718.1	100	76	0	0	1	76	106	31	2.79e-33	141
20	26056	300				yes	Temperature Annual Range	24.2539					/home/sofia/Documents/0_Remote/blast_candidate_genes/genome_PSP/MPAX01.3.fsa_nt	out_blastn_genomePSP1.3	300	MPAX011059346.1	100	76	0	0	1	76	446	521	4.58e-33	141
27	29444	339				yes	Mean Temperature of Warmest Quarter	15.1619					/home/sofia/Documents/0_Remote/blast_candidate_genes/genome_PSP/MPAX01.4.fsa_nt	out_blastn_genomePSP1.4	339	MPAX011459126.1	100	76	0	0	1	76	114	189	2.79e-33	141	/home/sofia/Documents/0_Remote/blast_candidate_genes/transcriptome_PSP/GCZA01.1.fsa_nt	out_blastn_transcriptome_PSP_1.1	339	GCZA01062045.1	100	76	0	0	1	76	128	203	8.92e-34	141	/home/sofia/Documents/0_Remote/blast_candidate_genes/transcriptome_PSP/GCZA01.1.fsa_nt	out_blastn_transcriptome_PSP_1.1	339	GCZA01062043.1	100	76	0	0	1
33	33962	391				yes	Precipitation of Driest Quarter	20.1475					/home/sofia/Documents/0_Remote/blast_candidate_genes/genome_PSP/MPAX01.3.fsa_nt	out_blastn_genomePSP1.3	391	MPAX010855241.1	100	76	0	0	1	76	463	538	4.58e-33	141
41	37446	431				yes	Longitude	16.6227					/home/sofia/Documents/0_Remote/blast_candidate_genes/genome_PSP/MPAX01.2.fsa_nt	out_blastn_genomePSP1.2	431	MPAX010381764.1	100	76	0	0	1	76	4968	4893	4.47e-33	141
49	43079	496	yes	yes	3.64799
85	74148	853				yes	Temperature Annual Range	19.6957
86	74357	855				yes	Mean Temperature of Warmest Quarter	16.1518					/home/sofia/Documents/0_Remote/blast_candidate_genes/genome_PSP/MPAX01.3.fsa_nt	out_blastn_genomePSP1.3	855	MPAX010789901.1	98.684	76	1	0	1	76	4298	4373	2.13e-31	135
98	84475	971				yes	Temperature Annual Range	22.1378					/home/sofia/Documents/0_Remote/blast_candidate_genes/genome_PSP/MPAX01.2.fsa_nt	out_blastn_genomePSP1.2	971	MPAX010663437.1	100	76	0	0	1	76	1146	1071	4.47e-33	141
110	95900	1103				yes	Longitude	22.8952
126	112223	1290				yes	Longitude	22.4363
137	124133	1427		yes	2.86059								/home/sofia/Documents/0_Remote/blast_candidate_genes/genome_PSP/MPAX01.2.fsa_nt	out_blastn_genomePSP1.2	1427	MPAX010577703.1	98.684	76	1	0	1	76	475	550	2.08e-31	135
164	143149	1646				yes	Longitude	16.1098					/home/sofia/Documents/0_Remote/blast_candidate_genes/genome_PSP/MPAX01.4.fsa_nt	out_blastn_genomePSP1.4	1646	MPAX011798748.1	100	76	0	0	1	76	430	355	2.79e-33	141
177	152381	1752				yes	Longitude	15.3685					/home/sofia/Documents/0_Remote/blast_candidate_genes/genome_PSP/MPAX01.2.fsa_nt	out_blastn_genomePSP1.2	1752	MPAX010654201.1	100	76	0	0	1	76	391	466	4.47e-33	141
187	158441	1822				yes	Longitude	16.6628
193	167063	1921				yes	Longitude	15.7026					/home/sofia/Documents/0_Remote/blast_candidate_genes/genome_PSP/MPAX01.4.fsa_nt	out_blastn_genomePSP1.4	1921	MPAX011814442.1	98.684	76	1	0	1	76	669	594	1.3e-31	135
204	177848	2045				yes	Precipitation of Driest Quarter	35.3614					/home/sofia/Documents/0_Remote/blast_candidate_genes/genome_PSP/MPAX01.4.fsa_nt	out_blastn_genomePSP1.4	2045	MPAX011822095.1	100	76	0	0	1	76	2035	1960	2.79e-33	141
210	183543	2110				yes	Longitude	23.4515
231	195798	2251		yes	2.25111
242	200749	2308				yes	Longitude	23.4515	Precipitation of Driest Quarter	20.863	Temperature Annual Range	17.2105	/home/sofia/Documents/0_Remote/blast_candidate_genes/transcriptome_PSP/GCZA01.1.fsa_nt	out_blastn_transcriptome_PSP_1.1	2308	GCZA01049211.1	100	76	0	0	1	76	505	430	8.92e-34	141
248	204562	2352				yes	Precipitation of Driest Quarter	19.9911					/home/sofia/Documents/0_Remote/blast_candidate_genes/genome_PSP/MPAX01.3.fsa_nt	out_blastn_genomePSP1.3	2352	MPAX011046340.1	100	76	0	0	1	76	718	643	4.58e-33	141
264	220048	2530				yes	Precipitation of Wettest Quarter	15.1851
268	225039	2587				yes	Precipitation of Driest Quarter	17.645
277	236370	2717				yes	Longitude	18.3217
289	246577	2835				yes	Longitude	22.3424
292	250634	2881				yes	Mean Temperature of Warmest Quarter	16.5422					/home/sofia/Documents/0_Remote/blast_candidate_genes/genome_PSP/MPAX01.4.fsa_nt	out_blastn_genomePSP1.4	2881	MPAX011812668.1	100	76	0	0	1	76	915	990	2.79e-33	141	/home/sofia/Documents/0_Remote/blast_candidate_genes/transcriptome_PSP/GCZA01.1.fsa_nt	out_blastn_transcriptome_PSP_1.1	2881	GCZA01037191.1	100	76	0	0	1	76	279	354	8.92e-34	141
299	258411	2971				yes	Longitude	25.1795					/home/sofia/Documents/0_Remote/blast_candidate_genes/genome_PSP/MPAX01.3.fsa_nt	out_blastn_genomePSP1.3	2971	MPAX010773807.1	98.684	76	1	0	1	76	512	437	2.13e-31	135
305	264192	3037				yes	Precipitation of Driest Quarter	15.2544
322	280761	3228				yes	Longitude	22.2677
324	283295	3257				yes	Precipitation of Wettest Quarter	17.4009
326	286549	3294				yes	Longitude	19.1024
342	302116	3473				yes	Temperature Annual Range	16.3179					/home/sofia/Documents/0_Remote/blast_candidate_genes/genome_PSP/MPAX01.4.fsa_nt	out_blastn_genomePSP1.4	3473	MPAX011822464.1	100	76	0	0	1	76	1876	1801	2.79e-33	141
349	311132	3577				yes	Longitude	17.3251
423	365102	4197				yes	Longitude	18.501
436	373673	4296				yes	Precipitation of Driest Quarter	15.3685					/home/sofia/Documents/0_Remote/blast_candidate_genes/genome_PSP/MPAX01.3.fsa_nt	out_blastn_genomePSP1.3	4296	MPAX010944428.1	100	76	0	0	1	76	72	147	4.58e-33	141
447	380094	4369				yes	Longitude	16.1518
458	395432	4546				yes	Longitude	18.8737					/home/sofia/Documents/0_Remote/blast_candidate_genes/genome_PSP/MPAX01.4.fsa_nt	out_blastn_genomePSP1.4	4546	MPAX011814857.1	100	76	0	0	1	76	1031	956	2.79e-33	141
483	409625	4709				yes	Temperature Annual Range	16.92					/home/sofia/Documents/0_Remote/blast_candidate_genes/genome_PSP/MPAX01.4.fsa_nt	out_blastn_genomePSP1.4	4709	MPAX011394755.1	100	76	0	0	1	76	138	213	2.79e-33	141
491	413938	4758				yes	Precipitation of Wettest Quarter	16.1098					/home/sofia/Documents/0_Remote/blast_candidate_genes/transcriptome_PSP/GCZA01.1.fsa_nt	out_blastn_transcriptome_PSP_1.1	4758	GCZA01025103.1	100	76	0	0	1	76	92	167	8.92e-34	141
492	414074	4760				yes	Longitude	17.0175					/home/sofia/Documents/0_Remote/blast_candidate_genes/genome_PSP/MPAX01.4.fsa_nt	out_blastn_genomePSP1.4	4760	MPAX011716836.1	100	76	0	0	1	76	329	404	2.79e-33	141
499	418704	4813				yes	Precipitation of Wettest Quarter	30.4466
501	419630	4824				yes	Precipitation of Driest Quarter	17.0757
507	423951	4873				yes	Precipitation of Driest Quarter	22.1193
508	424208	4876				yes	Precipitation of Driest Quarter	15.092					/home/sofia/Documents/0_Remote/blast_candidate_genes/genome_PSP/MPAX01.4.fsa_nt	out_blastn_genomePSP1.4	4876	MPAX011492966.1	98.684	76	1	0	1	76	73	148	1.3e-31	135
510	425896	4896				yes	Precipitation of Driest Quarter	34.2341					/home/sofia/Documents/0_Remote/blast_candidate_genes/genome_PSP/MPAX01.3.fsa_nt	out_blastn_genomePSP1.3	4896	MPAX010783423.1	98.684	76	1	0	1	76	388	463	2.13e-31	135
517	428354	4924				yes	Longitude	52.9645
518	429228	4934				yes	Mean Temperature of Warmest Quarter	22.0088
587	480355	5522				yes	Longitude	26.2537					/home/sofia/Documents/0_Remote/blast_candidate_genes/genome_PSP/MPAX01.4.fsa_nt	out_blastn_genomePSP1.4	5522	MPAX011693700.1	100	76	0	0	1	76	279	354	2.79e-33	141
596	486541	5593				yes	Precipitation of Driest Quarter	17.2297
598	486968	5598				yes	Precipitation of Driest Quarter	17.4952
612	503632	5789				yes	Longitude	15.3002	Precipitation of Driest Quarter	15.5036			/home/sofia/Documents/0_Remote/blast_candidate_genes/genome_PSP/MPAX01.3.fsa_nt	out_blastn_genomePSP1.3	5789	MPAX010972079.1	100	76	0	0	1	76	5584	5509	4.58e-33	141
615	504927	5804				yes	Precipitation of Driest Quarter	18.6436
628	512356	5890				yes	Longitude	26.6009
650	531583	6111				yes	Longitude	21.7535	Precipitation of Driest Quarter	19.0322			/home/sofia/Documents/0_Remote/blast_candidate_genes/genome_PSP/MPAX01.3.fsa_nt	out_blastn_genomePSP1.3	6111	MPAX010808870.1	100	76	0	0	1	76	689	764	4.58e-33	141
652	533367	6131				yes	Longitude	15.7463					/home/sofia/Documents/0_Remote/blast_candidate_genes/genome_PSP/MPAX01.3.fsa_nt	out_blastn_genomePSP1.3	6484	MPAX010932517.1	100	76	0	0	1	76	466	541	4.58e-33	141	/home/sofia/Documents/0_Remote/blast_candidate_genes/transcriptome_PSP/GCZA01.1.fsa_nt	out_blastn_transcriptome_PSP_1.1	6484	GCZA01086490.1	100	76	0	0	1	76	386	311	8.92e-34	141	/home/sofia/Documents/0_Remote/blast_candidate_genes/transcriptome_PSP/GCZA01.1.fsa_nt	out_blastn_transcriptome_PSP_1.1	6484	GCZA01086489.1	100	76	0	0	1
683	564102	6484				yes	Longitude	19.3124
689	572249	6578				yes	Longitude	19.5913
708	594179	6830				yes	Longitude	18.608
709	594369	6832				yes	Temperature Annual Range	15.1154
733	610385	7016				yes	Mean Diurnal Range (Mean of monthly (max temp - min temp))	19.0146					/home/sofia/Documents/0_Remote/blast_candidate_genes/genome_PSP/MPAX01.4.fsa_nt	out_blastn_genomePSP1.4	7016	MPAX011796153.1	100	76	0	0	1	76	791	716	2.79e-33	141
738	615049	7070				yes	Longitude	16.6828
760	631746	7262				yes	Temperature Annual Range	30.8672
764	634035	7288				yes	Longitude	15.4363					/home/sofia/Documents/0_Remote/blast_candidate_genes/genome_PSP/MPAX01.4.fsa_nt	out_blastn_genomePSP1.4	7288	MPAX011820445.1	100	76	0	0	1	76	1830	1755	2.79e-33	141
775	641302	7372				yes	Precipitation of Driest Quarter	16.9004
783	648779	7458				yes	Temperature Annual Range	17.9039					/home/sofia/Documents/0_Remote/blast_candidate_genes/genome_PSP/MPAX01.3.fsa_nt	out_blastn_genomePSP1.3	7458	MPAX010795367.1	98.684	76	1	0	1	76	1174	1099	2.13e-31	135
785	651022	7483				yes	Precipitation of Driest Quarter	23.4515	Temperature Annual Range	15.4363
834	684770	7871				yes	Longitude	18.4653					/home/sofia/Documents/0_Remote/blast_candidate_genes/genome_PSP/MPAX01.4.fsa_nt	out_blastn_genomePSP1.4	7871	MPAX011693256.1	100	76	0	0	1	76	443	368	2.79e-33	141
852	696240	8003		yes	2.11256
881	722612	8306				yes	Longitude	16.1727
898	738145	8485				yes	Longitude	22.7983					/home/sofia/Documents/0_Remote/blast_candidate_genes/genome_PSP/MPAX01.3.fsa_nt	out_blastn_genomePSP1.3	8495	MPAX011274934.1	98.684	76	1	0	1	76	52	127	2.13e-31	135
902	739004	8495		yes	4.46431
902	739004	8495	yes
905	740469	8512				yes	Mean Temperature of Warmest Quarter	16.6027	Precipitation of Wettest Quarter	18.9442
911	743430	8546				yes	Precipitation of Driest Quarter	18.8561					/home/sofia/Documents/0_Remote/blast_candidate_genes/genome_PSP/MPAX01.2.fsa_nt	out_blastn_genomePSP1.2	8546	MPAX010419676.1	100	76	0	0	1	76	1149	1074	4.47e-33	141
913	745709	8572	yes	yes	2.05147
936	762622	8766				yes	Longitude	15.2544					/home/sofia/Documents/0_Remote/blast_candidate_genes/genome_PSP/MPAX01.1.fsa_nt	out_blastn_genomePSP1.1	8766	MPAX010152458.1	98.684	76	1	0	1	76	1577	1652	2.06e-31	135
948	768228	8831				yes	Precipitation of Driest Quarter	24.1664					/home/sofia/Documents/0_Remote/blast_candidate_genes/genome_PSP/MPAX01.3.fsa_nt	out_blastn_genomePSP1.3	8831	MPAX011065612.1	100	76	0	0	1	76	834	759	4.58e-33	141
949	768444	8833				yes	Longitude	25.1307					/home/sofia/Documents/0_Remote/blast_candidate_genes/genome_PSP/MPAX01.1.fsa_nt	out_blastn_genomePSP1.1	8833	MPAX010084283.1	100	76	0	0	1	76	4308	4233	4.42e-33	141
974	786781	9044				yes	Longitude	23.3705
980	790544	9087				yes	Longitude	18.5902					/home/sofia/Documents/0_Remote/blast_candidate_genes/genome_PSP/MPAX01.4.fsa_nt	out_blastn_genomePSP1.4	9087	MPAX011563101.1	100	76	0	0	1	76	184	259	2.79e-33	141
995	809338	9303				yes	Longitude	20.5828
999	812243	9337				yes	Longitude	30.5047
1002	814125	9358				yes	Temperature Annual Range	16.9004					/home/sofia/Documents/0_Remote/blast_candidate_genes/genome_PSP/MPAX01.4.fsa_nt	out_blastn_genomePSP1.4	9358	MPAX011806032.1	98.684	76	1	0	1	76	818	743	1.3e-31	135
1006	817131	9393				yes	Longitude	15.5036					/home/sofia/Documents/0_Remote/blast_candidate_genes/genome_PSP/MPAX01.1.fsa_nt	out_blastn_genomePSP1.1	9393	MPAX010034838.1	98.684	76	1	0	1	76	59	134	2.06e-31	135	/home/sofia/Documents/0_Remote/blast_candidate_genes/genome_PSP/MPAX01.2.fsa_nt	out_blastn_genomePSP1.2	9393	MPAX010484611.1	98.684	76	1	0	1	76	528	453	2.08e-31	135
1008	817826	9401				yes	Longitude	23.7609					/home/sofia/Documents/0_Remote/blast_candidate_genes/genome_PSP/MPAX01.3.fsa_nt	out_blastn_genomePSP1.3	9401	MPAX010892439.1	98.684	76	1	0	1	76	785	710	2.13e-31	135	/home/sofia/Documents/0_Remote/blast_candidate_genes/genome_PSP/MPAX01.4.fsa_nt	out_blastn_genomePSP1.4	9401	MPAX011596721.1	100	76	0	0	1	76	343	268	2.79e-33	141
1013	819105	9415				yes	Longitude	18.3397
1020	827258	9509				yes	Longitude	19.452
1026	832513	9570		yes	2.85418								/home/sofia/Documents/0_Remote/blast_candidate_genes/genome_PSP/MPAX01.4.fsa_nt	out_blastn_genomePSP1.4	9570	MPAX011436689.1	100	76	0	0	1	76	64	139	2.79e-33	141
1035	839629	9651				yes	Precipitation of Wettest Quarter	17.5515
1055	855113	9829				yes	Temperature Annual Range	18.7146					/home/sofia/Documents/0_Remote/blast_candidate_genes/genome_PSP/MPAX01.3.fsa_nt	out_blastn_genomePSP1.3	9829	MPAX011044675.1	100	76	0	0	1	76	915	990	4.58e-33	141
1060	858090	9864				yes	Mean Temperature of Warmest Quarter	16.1098
1069	864245	9934		yes	2.5971								/home/sofia/Documents/0_Remote/blast_candidate_genes/genome_PSP/MPAX01.3.fsa_nt	out_blastn_genomePSP1.3	9934	MPAX011062757.1	100	76	0	0	1	76	3647	3722	4.58e-33	141
1078	874241	10049				yes	Longitude	15.8976
1099	890816	10240				yes	Longitude	17.363					/home/sofia/Documents/0_Remote/blast_candidate_genes/transcriptome_PSP/GCZA01.1.fsa_nt	out_blastn_transcriptome_PSP_1.1	10240	GCZA01071370.1	100	76	0	0	1	76	661	736	8.92e-34	141
1106	897254	10314				yes	Precipitation of Driest Quarter	17.4952					/home/sofia/Documents/0_Remote/blast_candidate_genes/transcriptome_PSP/GCZA01.1.fsa_nt	out_blastn_transcriptome_PSP_1.1	10314	GCZA01029812.1	98.684	76	1	0	1	76	157	82	4.15e-32	135
1109	901484	10362				yes	Longitude	22.0824					/home/sofia/Documents/0_Remote/blast_candidate_genes/genome_PSP/MPAX01.4.fsa_nt	out_blastn_genomePSP1.4	10362	MPAX011351945.1	100	76	0	0	1	76	68	143	2.79e-33	141
1111	903994	10391				yes	Longitude	25.2779
1124	915496	10523				yes	Mean Temperature of Warmest Quarter	22.5307
1131	919389	10568				yes	Precipitation of Driest Quarter	19.7826
1138	927984	10667				yes	Temperature Annual Range	18.8737
1139	928181	10669				yes	Precipitation of Driest Quarter	27.03					/home/sofia/Documents/0_Remote/blast_candidate_genes/transcriptome_PSP/GCZA01.1.fsa_nt	out_blastn_transcriptome_PSP_1.1	10669	GCZA01047991.1	100	76	0	0	1	76	50	125	8.92e-34	141
1149	936022	10759				yes	Precipitation of Wettest Quarter	33.7585					/home/sofia/Documents/0_Remote/blast_candidate_genes/genome_PSP/MPAX01.4.fsa_nt	out_blastn_genomePSP1.4	10759	MPAX011767814.1	98.684	76	1	0	1	76	211	136	1.3e-31	135
1158	943895	10850				yes	Precipitation of Driest Quarter	27.0936
1198	974843	11206	yes			yes	Mean Temperature of Warmest Quarter	20.2344
1219	986362	11338				yes	Longitude	16.0043
1221	987395	11350				yes	Temperature Annual Range	28.2894
1224	993000	11414				yes	Temperature Annual Range	22.3424
1249	1016412	11683		yes	2.39643
1264	1025818	11791				yes	Longitude	16.7623	Precipitation of Driest Quarter	15.5259
1268	1028164	11818				yes	Precipitation of Wettest Quarter	27.2885
1277	1032907	11873				yes	Longitude	17.3441					/home/sofia/Documents/0_Remote/blast_candidate_genes/genome_PSP/MPAX01.4.fsa_nt	out_blastn_genomePSP1.4	11873	MPAX011693700.1	100	76	0	0	1	76	260	185	2.79e-33	141	/home/sofia/Documents/0_Remote/blast_candidate_genes/transcriptome_PSP/GCZA01.1.fsa_nt	out_blastn_transcriptome_PSP_1.1	11873	GCZA01057296.1	100	76	0	0	1	76	185	260	8.92e-34	141
1284	1036788	11918				yes	Longitude	21.0037
1288	1040559	11961				yes	Longitude	15.6368
1304	1056666	12146				yes	Mean Temperature of Warmest Quarter	15.2083
1310	1059967	12184				yes	Precipitation of Driest Quarter	17.0563
1315	1063547	12225				yes	Longitude	16.2559					/home/sofia/Documents/0_Remote/blast_candidate_genes/genome_PSP/MPAX01.1.fsa_nt	out_blastn_genomePSP1.1	12225	MPAX010353023.1	100	76	0	0	1	76	247	322	4.42e-33	141
1316	1065765	12251		yes	2.6471
1326	1073820	12343				yes	Longitude	21.2159					/home/sofia/Documents/0_Remote/blast_candidate_genes/genome_PSP/MPAX01.3.fsa_nt	out_blastn_genomePSP1.3	12423	MPAX011061571.1	98.684	76	1	0	1	76	1011	936	2.13e-31	135
1329	1080761	12423	yes	yes	3.07372
1331	1081254	12429				yes	Longitude	27.6274
1346	1090760	12538				yes	Longitude	20.1301
1352	1094690	12583				yes	Temperature Annual Range	15.3912					/home/sofia/Documents/0_Remote/blast_candidate_genes/genome_PSP/MPAX01.4.fsa_nt	out_blastn_genomePSP1.4	12583	MPAX011805881.1	100	76	0	0	1	76	435	510	2.79e-33	141	/home/sofia/Documents/0_Remote/blast_candidate_genes/transcriptome_PSP/GCZA01.1.fsa_nt	out_blastn_transcriptome_PSP_1.1	12583	GCZA01059336.1	100	76	0	0	1	76	563	488	8.92e-34	141	/home/sofia/Documents/0_Remote/blast_candidate_genes/transcriptome_PSP/GCZA01.1.fsa_nt	out_blastn_transcriptome_PSP_1.1	12583	GCZA01059334.1	100	76	0	0	1
1359	1098599	12628				yes	Precipitation of Driest Quarter	20.4258					/home/sofia/Documents/0_Remote/blast_candidate_genes/genome_PSP/MPAX01.4.fsa_nt	out_blastn_genomePSP1.4	12628	MPAX011705997.1	98.684	76	1	0	1	76	258	183	1.3e-31	135
1363	1103536	12685				yes	Temperature Annual Range	15.4363
1375	1110888	12769				yes	Temperature Annual Range	22.4175
1392	1121913	12896				yes	Precipitation of Wettest Quarter	16.522
1412	1134053	13036				yes	Longitude	15.3002
1428	1146668	13181		yes	2.08719
1436	1155535	13282				yes	Precipitation of Wettest Quarter	32.1427
1439	1157232	13302				yes	Longitude	20.0258					/home/sofia/Documents/0_Remote/blast_candidate_genes/genome_PSP/MPAX01.4.fsa_nt	out_blastn_genomePSP1.4	13302	MPAX011778293.1	100	76	0	0	1	76	354	429	2.79e-33	141
1451	1165954	13402				yes	Longitude	18.6258					/home/sofia/Documents/0_Remote/blast_candidate_genes/genome_PSP/MPAX01.3.fsa_nt	out_blastn_genomePSP1.3	13402	MPAX011020742.1	100	76	0	0	1	76	1168	1243	4.58e-33	141
1470	1183338	13602				yes	Temperature Annual Range	17.1529
1477	1186821	13642		yes	2.47406								/home/sofia/Documents/0_Remote/blast_candidate_genes/genome_PSP/MPAX01.2.fsa_nt	out_blastn_genomePSP1.2	13642	MPAX010483262.1	100	76	0	0	1	76	1830	1905	4.47e-33	141
1478	1187637	13651				yes	Longitude	18.7323
1482	1192564	13708				yes	Longitude	26.1695					/home/sofia/Documents/0_Remote/blast_candidate_genes/genome_PSP/MPAX01.4.fsa_nt	out_blastn_genomePSP1.4	13708	MPAX011421079.1	98.684	76	1	0	1	76	156	81	1.3e-31	135
1519	1221084	14036				yes	Longitude	16.2559					/home/sofia/Documents/0_Remote/blast_candidate_genes/genome_PSP/MPAX01.2.fsa_nt	out_blastn_genomePSP1.2	14036	MPAX010518544.1	100	76	0	0	1	76	1005	930	4.47e-33	141
1538	1238977	14242				yes	Temperature Annual Range	17.1336					/home/sofia/Documents/0_Remote/blast_candidate_genes/genome_PSP/MPAX01.4.fsa_nt	out_blastn_genomePSP1.4	14242	MPAX011341097.1	100	76	0	0	1	76	41	116	2.79e-33	141
1596	1286686	14790				yes	Longitude	18.8737
1604	1298456	14925				yes	Precipitation of Driest Quarter	16.7027					/home/sofia/Documents/0_Remote/blast_candidate_genes/transcriptome_PSP/GCZA01.1.fsa_nt	out_blastn_transcriptome_PSP_1.1	14925	GCZA01047944.1	100	76	0	0	1	76	271	346	8.92e-34	141
1610	1302989	14977				yes	Longitude	22.837					/home/sofia/Documents/0_Remote/blast_candidate_genes/genome_PSP/MPAX01.4.fsa_nt	out_blastn_genomePSP1.4	14977	MPAX011500792.1	100	76	0	0	1	76	189	114	2.79e-33	141
1627	1329428	15281				yes	Precipitation of Driest Quarter	15.2773					/home/sofia/Documents/0_Remote/blast_candidate_genes/genome_PSP/MPAX01.1.fsa_nt	out_blastn_genomePSP1.1	15281	MPAX010306876.1	100	76	0	0	1	76	26	101	4.42e-33	141
1628	1330806	15297				yes	Longitude	19.8					/home/sofia/Documents/0_Remote/blast_candidate_genes/genome_PSP/MPAX01.4.fsa_nt	out_blastn_genomePSP1.4	15297	MPAX011774669.1	100	76	0	0	1	76	550	475	2.79e-33	141
1642	1347800	15492		yes	2.0986
1644	1348906	15505				yes	Precipitation of Wettest Quarter	15.919
1657	1391042	15989				yes	Precipitation of Driest Quarter	18.0866					/home/sofia/Documents/0_Remote/blast_candidate_genes/genome_PSP/MPAX01.3.fsa_nt	out_blastn_genomePSP1.3	15989	MPAX010799587.1	100	76	0	0	1	76	700	775	4.58e-33	141
1673	1419116	16312				yes	Longitude	23.7609
1674	1420457	16328				yes	Precipitation of Driest Quarter	16.1098					/home/sofia/Documents/0_Remote/blast_candidate_genes/genome_PSP/MPAX01.4.fsa_nt	out_blastn_genomePSP1.4	16328	MPAX011680841.1	100	76	0	0	1	76	241	166	2.79e-33	141
1687	1457335	16751				yes	Longitude	18.1592
1690	1461066	16794				yes	Longitude	15.0685					/home/sofia/Documents/0_Remote/blast_candidate_genes/genome_PSP/MPAX01.3.fsa_nt	out_blastn_genomePSP1.3	16794	MPAX010834842.1	100	76	0	0	1	76	190	115	4.58e-33	141	/home/sofia/Documents/0_Remote/blast_candidate_genes/transcriptome_PSP/GCZA01.1.fsa_nt	out_blastn_transcriptome_PSP_1.1	16794	GCZA01070915.1	100	76	0	0	1	76	270	345	8.92e-34	141
1715	1531261	17601				yes	Temperature Annual Range	17.9589
1718	1537415	17672				yes	Longitude	17.8118
1727	1548805	17803		yes	2.83181								/home/sofia/Documents/0_Remote/blast_candidate_genes/genome_PSP/MPAX01.1.fsa_nt	out_blastn_genomePSP1.1	17803	MPAX010114012.1	98.684	76	1	0	1	76	107	32	2.06e-31	135
1728	1553560	17857		yes	2.34879								/home/sofia/Documents/0_Remote/blast_candidate_genes/genome_PSP/MPAX01.2.fsa_nt	out_blastn_genomePSP1.2	17857	MPAX010441245.1	98.684	76	1	0	1	76	1137	1212	2.08e-31	135
1736	1576306	18119				yes	Longitude	21.7535					/home/sofia/Documents/0_Remote/blast_candidate_genes/genome_PSP/MPAX01.4.fsa_nt	out_blastn_genomePSP1.4	18119	MPAX011767764.1	100	76	0	0	1	76	507	432	2.79e-33	141
1741	1593798	18320		yes	2.9639								/home/sofia/Documents/0_Remote/blast_candidate_genes/genome_PSP/MPAX01.1.fsa_nt	out_blastn_genomePSP1.1	18320	MPAX010315044.1	98.684	76	1	0	1	76	690	615	2.06e-31	135
1754	1624998	18679				yes	Precipitation of Driest Quarter	16.9395
1755	1626347	18694				yes	Precipitation of Driest Quarter	19.1024
1758	1634173	18784				yes	Mean Diurnal Range (Mean of monthly (max temp - min temp))	17.3441
1763	1643997	18897		yes	2.33152
1768	1668134	19174				yes	Mean Temperature of Warmest Quarter	22.5118
1786	1695539	19489				yes	Temperature Annual Range	16.2972
1803	1728490	19868				yes	Longitude	17.2297					/home/sofia/Documents/0_Remote/blast_candidate_genes/genome_PSP/MPAX01.2.fsa_nt	out_blastn_genomePSP1.2	19868	MPAX010595298.1	100	76	0	0	1	76	364	289	4.47e-33	141
1810	1741575	20019				yes	Longitude	17.2679					/home/sofia/Documents/0_Remote/blast_candidate_genes/genome_PSP/MPAX01.4.fsa_nt	out_blastn_genomePSP1.4	20019	MPAX011372835.1	100	76	0	0	1	76	138	213	2.79e-33	141
1811	1742822	20033				yes	Temperature Annual Range	19.9911
1827	1787078	20542				yes	Temperature Annual Range	26.9984
1895	1927254	22153		yes	2.98023
1905	1953464	22454				yes	Precipitation of Wettest Quarter	17.2105
1906	1955094	22473				yes	Longitude	22.9536
1912	1974962	22701				yes	Precipitation of Driest Quarter	17.382
1916	1985005	22817	yes	yes	2.20547
1920	1993005	22909				yes	Precipitation of Driest Quarter	23.6155
1935	2024422	23270				yes	Longitude	15.5259
1954	2068529	23777				yes	Longitude	16.4204
1960	2087686	23997				yes	Longitude	15.8761
1974	2122202	24394				yes	Mean Temperature of Warmest Quarter	16.9981					/home/sofia/Documents/0_Remote/blast_candidate_genes/genome_PSP/MPAX01.4.fsa_nt	out_blastn_genomePSP1.4	24394	MPAX011776761.1	98.684	76	1	0	1	76	298	223	1.3e-31	135
1979	2131912	24505				yes	Longitude	18.0866					/home/sofia/Documents/0_Remote/blast_candidate_genes/transcriptome_PSP/GCZA01.1.fsa_nt	out_blastn_transcriptome_PSP_1.1	24505	GCZA01081763.1	100	76	0	0	1	76	683	758	8.92e-34	141
1985	2137949	24575				yes	Longitude	26.2255					/home/sofia/Documents/0_Remote/blast_candidate_genes/genome_PSP/MPAX01.3.fsa_nt	out_blastn_genomePSP1.3	24575	MPAX010987606.1	100	76	0	0	1	76	322	397	4.58e-33	141
1986	2153883	24758				yes	Precipitation of Wettest Quarter	16.1308
2009	2244978	25805				yes	Temperature Annual Range	52.9645					/home/sofia/Documents/0_Remote/blast_candidate_genes/genome_PSP/MPAX01.2.fsa_nt	out_blastn_genomePSP1.2	25805	MPAX010677201.1	98.684	76	1	0	1	76	572	497	2.08e-31	135
2012	2251066	25875		yes	3.15618
2016	2271882	26114				yes	Longitude	17.0757					/home/sofia/Documents/0_Remote/blast_candidate_genes/genome_PSP/MPAX01.2.fsa_nt	out_blastn_genomePSP1.2	26114	MPAX010574580.1	100	76	0	0	1	76	286	211	4.47e-33	141
2026	2329984	26782				yes	Precipitation of Driest Quarter	16.0466
2027	2336038	26851				yes	Longitude	15.3912
2037	2379333	27349		yes	2.20502
2055	2593914	29816	yes	yes	2.89647
2071	3296117	37887				yes	Mean Temperature of Warmest Quarter	22.5497
2074	3373074	38771	yes	yes	2.35732
2079	3568559	41018				yes	Precipitation of Driest Quarter	15.1387
2083	3628029	41702		yes	2.26479								/home/sofia/Documents/0_Remote/blast_candidate_genes/genome_PSP/MPAX01.3.fsa_nt	out_blastn_genomePSP1.3	41702	MPAX011060897.1	100	76	0	0	1	76	248	323	4.58e-33	141
[truncated: 5 more columns]

## Sheet: Table_S4a_Environ_variables
			STANDARDIZED
WORLDCLIM Bioclimatic variables	order_variables	LABELS	AZO	FRA	FIN	GRE	POR	TURK	UK	USA
	1	Latitude	-0.808905	-0.204631	2.09858	-0.711707	-0.685131	-0.449932	0.845235	-0.0835078
	2	Longitude	-0.649894	0.186074	0.83032	0.767067	-0.182257	1.07344	-0.00493309	-2.01982
	3	Altitude	0.284613	-0.901559	-0.792486	1.44352	-0.785669	1.55941	-0.501624	-0.306201
BIO1 = Annual Mean Temperature	4	AnnualMeanTemperature	0.919942	1.05215	-1.61403	0.214837	1.05215	-0.269923	-0.291958	-1.06317
BIO2 = Mean Diurnal Range (Mean of monthly (max temp - min temp))	5	MeanDiurnalRangeT	-1.22076	0.102135	-0.170225	0.685765	-0.831672	0.763582	-0.987307	1.65848
BIO3 = Isothermality (BIO2/BIO7) (* 100)	6	Isothermality	0.928722	0.166694	-1.92888	0.357201	1.30974	0.166694	-0.404827	-0.595335
BIO4 = Temperature Seasonality (standard deviation *100)	7	TemperatureSeasonality	-1.3253	-0.196362	1.08228	0.196256	-1.14354	0.418079	-0.526565	1.49514
BIO5 = Max Temperature of Warmest Month	8	MaxTWarmMonth	-0.513046	1.36415	-1.08575	1.10961	-0.258512	0.377825	-1.43573	0.441458
BIO6 = Min Temperature of Coldest Month	9	MinTColdMonth	1.1605	0.600946	-1.249	0.0642341	1.06914	-0.358284	0.258364	-1.5459
BIO7 = Temperature Annual Range (BIO5-BIO6)	10	T_AnnualRange	-1.27645	-0.105694	0.815738	0.317081	-1.10301	0.468846	-0.734435	1.61793
BIO8 = Mean Temperature of Wettest Quarter	11	MeanTWetQ	0.952388	0.843284	0.988756	-0.447781	0.788732	-1.37517	-0.593254	-1.15696
BIO9 = Mean Temperature of Driest Quarter	12	MeanTDriQ	0.474187	0.890656	-1.47236	0.6281	0.582831	0.456079	0.130147	-1.68964
BIO10 = Mean Temperature of Warmest Quarter	13	MeanTWarmQ	0.197028	1.65503	-1.49741	0.669894	0.472866	-0.118217	-1.10335	-0.275839
BIO11 = Mean Temperature of Coldest Quarter	14	MeanTColdQ	1.15532	0.726677	-1.40312	0.0971135	1.08834	-0.385105	0.0703236	-1.34954
BIO12 = Annual Precipitation	15	AnnualPrecipitation	0.749125	-0.973414	-1.01289	-0.291576	-0.320285	-0.829869	1.35919	1.31972
BIO13 = Precipitation of Wettest Month	16	PwetM	0.992613	-1.08715	-1.27622	0.349778	0.349778	-1.04933	1.29512	0.425405
BIO14 = Precipitation of Driest Month	17	PdriM	0.00422581	-0.570485	-0.300033	-0.671904	-1.11139	-0.401452	1.32268	1.72836
BIO15 = Precipitation Seasonality (Coefficient of Variation)	18	Pseasonality	0.166941	-0.379411	-0.257999	0.895409	1.74529	0.106235	-0.743645	-1.53282
BIO16 = Precipitation of Wettest Quarter	19	PwetQ	1.06174	-1.25584	-1.12837	0.169473	0.505523	-1.00091	1.25874	0.389644
BIO17 = Precipitation of Driest Quarter	20	PdriQ	-0.0119251	-0.381602	-0.393527	-0.620103	-1.09711	-0.548553	1.25213	1.80068
BIO18 = Precipitation of Warmest Quarter	21	PwarmQ	0.136582	-0.664701	0.511208	-0.820795	-1.26827	-0.529419	0.969085	1.66631
BIO19 = Precipitation of Coldest Quarter	22	PcoldQ	0.827041	-1.18167	-1.64761	0.506061	0.588895	-0.477587	1.14802	0.236852

## Sheet: Table_S4b_Output_BayPass_aux_su
	COVARIABLE	MRK	M_Beta	SD_Beta	M_Delta	BF(dB)
BIO12 = Annual Precipitation	15	1275	-0.202654	0.0676911	0.934	31.4644
BIO12 = Annual Precipitation	15	774	-0.0825193	0.055789	0.742	24.5442
BIO12 = Annual Precipitation	15	978	0.0969275	0.0938631	0.546	20.7577
BIO12 = Annual Precipitation	15	2764	-0.0761059	0.0880681	0.463	19.3124
BIO12 = Annual Precipitation	15	3275	0.0330898	0.0494439	0.346	17.1913
BIO12 = Annual Precipitation	15	398	0.0299116	0.0496982	0.29	16.0677
BIO12 = Annual Precipitation	15	1529	0.0343657	0.0615895	0.266	15.5482
BIO12 = Annual Precipitation	15	1084	0.0517968	0.0941399	0.244	15.045
BIO15 = Precipitation Seasonality (Coefficient of Variation)	18	2740	-0.0911719	0.0876873	0.572	21.2159
BIO15 = Precipitation Seasonality (Coefficient of Variation)	18	2580	0.0688483	0.0810114	0.455	19.1725
BIO15 = Precipitation Seasonality (Coefficient of Variation)	18	823	-0.0411415	0.0697283	0.273	15.7026
BIO16 = Precipitation of Wettest Quarter	19	2067	0.139756	0.112873	0.633	22.3237
BIO16 = Precipitation of Wettest Quarter	19	2345	0.118826	0.108174	0.58	21.3581
BIO16 = Precipitation of Wettest Quarter	19	1860	-0.0840623	0.0926517	0.478	19.5739
BIO16 = Precipitation of Wettest Quarter	19	2255	-0.0587947	0.0740523	0.414	18.4474
BIO16 = Precipitation of Wettest Quarter	19	820	-0.0345467	0.0533997	0.324	16.7623
BIO16 = Precipitation of Wettest Quarter	19	2764	-0.0333722	0.0603062	0.253	15.2544
BIO17 = Precipitation of Driest Quarter	17	338	-0.0418499	0.0716804	0.28	15.8546
BIO7 = Temperature Annual Range (BIO5-BIO6)	10	3274	0.220843	0.042933	0.987	38.7601
BIO7 = Temperature Annual Range (BIO5-BIO6)	10	39	0.0825163	0.045337	0.819	26.5124
BIO7 = Temperature Annual Range (BIO5-BIO6)	10	1977	0.109685	0.0704937	0.777	25.3775
BIO7 = Temperature Annual Range (BIO5-BIO6)	10	2249	-0.0789295	0.0609412	0.689	23.4109
BIO7 = Temperature Annual Range (BIO5-BIO6)	10	1200	0.0802218	0.0622091	0.677	23.1702
BIO7 = Temperature Annual Range (BIO5-BIO6)	10	2967	0.076816	0.0628066	0.65	22.6448
BIO7 = Temperature Annual Range (BIO5-BIO6)	10	1237	-0.0841144	0.0714013	0.623	22.1378
BIO7 = Temperature Annual Range (BIO5-BIO6)	10	143	0.0559335	0.0535309	0.604	21.7898
BIO7 = Temperature Annual Range (BIO5-BIO6)	10	2813	-0.0991054	0.0986354	0.551	20.8454
BIO7 = Temperature Annual Range (BIO5-BIO6)	10	1999	0.0538271	0.0554149	0.53	20.4781
BIO7 = Temperature Annual Range (BIO5-BIO6)	10	1271	0.105156	0.107388	0.527	20.4258
BIO7 = Temperature Annual Range (BIO5-BIO6)	10	2606	-0.0422668	0.0474295	0.498	19.9216
BIO7 = Temperature Annual Range (BIO5-BIO6)	10	2999	0.0558993	0.0622678	0.481	19.6261
BIO7 = Temperature Annual Range (BIO5-BIO6)	10	2879	-0.0461309	0.0673702	0.359	17.4387
BIO7 = Temperature Annual Range (BIO5-BIO6)	10	1621	-0.0299509	0.0464467	0.332	16.92
BIO7 = Temperature Annual Range (BIO5-BIO6)	10	1987	-0.061386	0.0933402	0.328	16.8414
BIO7 = Temperature Annual Range (BIO5-BIO6)	10	2513	-0.0281913	0.0434407	0.322	16.7226
BIO7 = Temperature Annual Range (BIO5-BIO6)	10	1840	0.0265352	0.0419264	0.308	16.4408
BIO7 = Temperature Annual Range (BIO5-BIO6)	10	879	-0.0525506	0.0842712	0.302	16.3179
BIO7 = Temperature Annual Range (BIO5-BIO6)	10	2227	0.0216701	0.0411736	0.255	15.3002
Longitude	2	1243	-0.054101	0.0670299	0.443	18.9618
Longitude	2	3156	-0.103227	0.123408	0.421	18.5724
Longitude	2	2640	-0.047407	0.067244	0.366	17.5703
Longitude	2	474	0.0688535	0.0952985	0.363	17.514
Longitude	2	3235	-0.0292959	0.0418473	0.346	17.1913
Longitude	2	3282	0.0723009	0.111308	0.307	16.4204
Longitude	2	3288	0.0339155	0.0615811	0.263	15.4812
Longitude	2	2432	0.0197241	0.0344349	0.26	15.4138
	2	2422	0.0295298	0.0539415	0.242	14.9978
	2	1470	0.0594931	0.108248	0.24	14.9503
	10	474	-0.0512874	0.0956843	0.24	14.9503
	15	881	-0.0458823	0.0866977	0.238	14.9026
	2	850	-0.035395	0.0656563	0.235	14.8304
	2	1341	-0.0283619	0.0551676	0.227	14.6348
	2	1061	0.0561858	0.106473	0.225	14.5852
	2	2416	0.0317351	0.0643945	0.225	14.5852
	2	3118	-0.0321489	0.0625586	0.225	14.5852
	17	1529	0.0307326	0.0599276	0.222	14.5101
	10	1708	-0.019327	0.0402712	0.209	14.176
	10	1318	-0.0161791	0.0347258	0.201	13.9628
	19	534	-0.0191164	0.0406223	0.195	13.7987
	2	1109	0.036484	0.0782904	0.19	13.659
	18	1825	-0.0247394	0.0534197	0.189	13.6308
	2	1084	0.0343292	0.0723901	0.188	13.6024
	19	1084	0.029966	0.0645242	0.187	13.5739
	10	2460	-0.015701	0.0342653	0.186	13.5452
	19	1946	-0.0399739	0.0869511	0.185	13.5165
	10	2416	-0.0150239	0.0341617	0.179	13.3415
	17	1841	0.026713	0.0616365	0.179	13.3415
	2	2093	0.0189574	0.0424624	0.176	13.2522
	2	3369	-0.0113024	0.0264365	0.173	13.1618
	10	2281	-0.0283054	0.0658145	0.173	13.1618
	15	2913	0.015014	0.0350606	0.172	13.1313
	10	1100	-0.0188733	0.0446335	0.17	13.0701
	17	3138	-0.0175491	0.0426245	0.17	13.0701
	10	2869	0.0169698	0.0401544	0.167	12.9771
	10	2311	0.0302638	0.0714097	0.166	12.9458
	10	213	-0.0219075	0.0518067	0.164	12.8827
	10	1190	-0.015137	0.0375685	0.164	12.8827
	2	2305	0.0209876	0.0510107	0.16	12.7548
	10	1145	0.0172827	0.0431855	0.157	12.6571
	10	2406	0.0124244	0.0299762	0.157	12.6571
	10	5	0.00982185	0.023841	0.156	12.6242
	10	163	-0.0131066	0.0332345	0.156	12.6242
	19	892	0.00666439	0.0155412	0.156	12.6242
	2	1155	0.0122887	0.0308118	0.155	12.5911
	18	1893	0.0283777	0.0688848	0.155	12.5911
	17	978	0.0275379	0.0661419	0.153	12.5244
	10	1377	-0.0165007	0.041915	0.151	12.457
	18	366	0.0321449	0.0791118	0.151	12.457
	17	2142	0.0347898	0.0859628	0.15	12.4231
	19	2460	0.00983206	0.024359	0.15	12.4231
	2	542	-0.0176173	0.0442068	0.146	12.2853
	2	2117	-0.0181981	0.0455947	0.146	12.2853
	15	1293	0.00293575	0.00725915	0.143	12.1799
	19	430	0.0201179	0.0521667	0.143	12.1799
	10	1107	-0.00647856	0.0166974	0.142	12.1444
	18	1116	-0.0117638	0.0329546	0.142	12.1444
	15	1841	0.0217662	0.0556567	0.141	12.1086
	18	2073	0.0273903	0.0703379	0.141	12.1086
	15	1023	-0.0200305	0.0532287	0.14	12.0726
	15	882	0.00982887	0.027129	0.139	12.0365
	10	1744	0.0112797	0.0292047	0.138	12.0001
	17	1825	0.0112559	0.0292549	0.137	11.9634
	18	1841	-0.0194779	0.0510762	0.136	11.9266
	15	106	0.0131349	0.0356484	0.135	11.8895
	18	3029	0.0164105	0.0438522	0.134	11.8522
	15	837	0.0156909	0.0425543	0.132	11.7769
	18	1686	-0.0136612	0.0374932	0.129	11.6621
	18	1529	-0.018316	0.0491472	0.128	11.6233
	18	2402	0.0201096	0.0548365	0.128	11.6233
	10	2250	0.00534954	0.014858	0.127	11.5842
	2	820	0.0171078	0.0464599	0.126	11.5449
	15	1055	0.0260333	0.070964	0.126	11.5449
	17	58	0.0136018	0.0376229	0.126	11.5449
	18	1463	-0.019731	0.0532254	0.126	11.5449
	19	230	-0.0144807	0.0419463	0.125	11.5054
	15	1557	0.0180534	0.0526389	0.123	11.4254
	2	3138	0.0137775	0.0387222	0.121	11.3443
	2	1708	0.0152255	0.0443025	0.12	11.3033
	15	2872	0.00951831	0.0279532	0.12	11.3033
	10	1286	0.00978826	0.0281238	0.119	11.2621
	10	1674	0.0169417	0.0481256	0.119	11.2621
	19	3128	-0.00873984	0.0245013	0.119	11.2621
	10	2340	0.00678643	0.0196662	0.118	11.2205
	17	2672	0.0230134	0.0643054	0.118	11.2205
	10	771	-0.00911806	0.0263104	0.114	11.0511
	2	1123	0.0183375	0.05466	0.113	11.0079
	15	2410	-0.00563031	0.0169424	0.113	11.0079
	15	3312	0.0198796	0.0583798	0.113	11.0079
	10	2927	-0.0079768	0.0239363	0.112	10.9644
	15	1583	0.0105325	0.0307556	0.112	10.9644
	19	310	-0.00920959	0.0269241	0.112	10.9644
	19	3085	0.007218	0.0212131	0.111	10.9206
	2	2646	0.0252679	0.0756245	0.107	10.7417
	10	2496	-0.0045116	0.0131999	0.107	10.7417
	17	2721	0.0114685	0.034474	0.107	10.7417
	19	486	-0.00285815	0.00872519	0.107	10.7417
	10	3231	-0.0136915	0.041556	0.105	10.65
	18	2440	0.00910189	0.0278077	0.103	10.5568
	10	1148	-0.0135123	0.0435001	0.101	10.462
	10	513	0.013531	0.0427236	0.1	10.4139
	10	1890	-0.00437511	0.0140199	0.1	10.4139
	2	1575	-0.0106461	0.0329889	0.099	10.3655
	15	58	0.00871068	0.027183	0.099	10.3655
	19	3072	0.0185181	0.058768	0.099	10.3655
	19	1023	-0.0137883	0.0444088	0.098	10.3165
	2	350	0.0083713	0.0262412	0.097	10.2672
	10	1305	0.00863227	0.0287464	0.097	10.2672
	17	837	0.0148962	0.0475796	0.096	10.2174
	2	1023	0.0184734	0.0596836	0.095	10.1671
	19	371	-0.0048764	0.0157176	0.095	10.1671
	17	833	0.0102394	0.0325319	0.094	10.1163
	18	2131	-0.0122977	0.0408557	0.094	10.1163
	2	585	0.013154	0.0433791	0.093	10.0651
	19	1557	0.0147723	0.0479557	0.093	10.0651
	2	1544	0.00853258	0.0278258	0.092	10.0134
	2	1611	0.0190751	0.0621057	0.092	10.0134
	2	3239	0.0196619	0.06428	0.091	9.96113
	2	184	0.012075	0.0407777	0.09	9.90836
	15	3060	-0.0168514	0.0563358	0.09	9.90836
	19	2432	-0.00456957	0.0150005	0.09	9.90836
	2	2821	-0.0056966	0.0194931	0.089	9.85507
	2	3023	-0.0208881	0.0684603	0.089	9.85507
	17	1795	0.0101733	0.033036	0.089	9.85507
	2	2393	0.0059605	0.0204478	0.088	9.80123
	15	906	0.0157367	0.0530829	0.088	9.80123
	18	1148	0.016374	0.0557549	0.087	9.74684
	18	1184	-0.00582192	0.0200376	0.087	9.74684
	2	1635	-0.00752826	0.0254364	0.085	9.63633
	19	1674	-0.0103759	0.0355318	0.085	9.63633
	10	1164	-0.0087294	0.030761	0.084	9.58019
	19	655	0.00828979	0.0290008	0.084	9.58019
	2	295	0.008292	0.028067	0.083	9.52344
	2	1964	-0.0068321	0.0245881	0.082	9.46606
	2	3224	-0.0157877	0.0550867	0.082	9.46606
	18	2220	-0.00837649	0.0284921	0.082	9.46606
	19	1335	0.00552511	0.0199667	0.082	9.46606
	18	2869	-0.00619482	0.0221554	0.081	9.40805
	15	2585	0.0140583	0.0514347	0.077	9.16924
	19	1801	0.00997613	0.0362965	0.077	9.16924
	10	1068	0.00084622	0.00379046	0.076	9.10777
	18	3250	-0.00583746	0.0208365	0.076	9.10777
	2	1630	0.0139591	0.0519003	0.075	9.04555
	2	1742	-0.00865082	0.0341767	0.075	9.04555
	15	2739	-0.00781146	0.0281203	0.075	9.04555
	18	25	0.00732923	0.026958	0.075	9.04555
	19	2434	0.00387281	0.0142946	0.075	9.04555
	15	2013	0.0116792	0.0430208	0.074	8.98256
	15	2345	0.00972444	0.0371301	0.073	8.91878
	15	2721	0.00839373	0.0317797	0.073	8.91878
	18	837	-0.00991668	0.0368809	0.073	8.91878
	15	503	0.00481726	0.0182212	0.072	8.8542
	19	2999	-0.00982188	0.0372683	0.072	8.8542
	2	1473	0.0051535	0.0210347	0.07	8.7225
	10	3302	0.00771338	0.0300743	0.07	8.7225
	15	820	-0.00649942	0.0246468	0.07	8.7225
	19	1618	-0.00406635	0.0159049	0.07	8.7225
	2	2292	-0.0127058	0.0482361	0.069	8.65535
	2	2516	-0.00379692	0.0145097	0.069	8.65535
	15	744	-0.001024	0.00400601	0.069	8.65535
	19	65	0.0138501	0.0534332	0.069	8.65535
	19	2172	-0.00376241	0.0140409	0.069	8.65535
	2	305	0.0136456	0.0538249	0.068	8.58728
	2	1892	-0.00967969	0.0418189	0.068	8.58728
	10	2640	0.0114151	0.0450721	0.068	8.58728
	15	15	0.00419195	0.0159584	0.068	8.58728
	19	3282	-0.00852415	0.0330298	0.068	8.58728
	2	2220	-0.00493323	0.0188616	0.067	8.51828
	10	182	-0.00398059	0.0159153	0.067	8.51828
	10	366	-0.00991995	0.0396755	0.067	8.51828
	10	2255	-0.00350465	0.014182	0.067	8.51828
	15	2062	-0.00670726	0.0260938	0.067	8.51828
	15	1639	-0.00336381	0.0135614	0.065	8.37737
	19	1169	-0.0110221	0.0453068	0.065	8.37737
	10	2546	-0.0061238	0.0263174	0.064	8.30539
	2	1102	0.00448712	0.017842	0.063	8.23236
	10	2762	-0.00366175	0.014983	0.063	8.23236
	17	2220	0.00412686	0.0171566	0.063	8.23236
	19	150	-0.00604679	0.0242359	0.063	8.23236
	19	343	0.00508574	0.0204098	0.063	8.23236
	2	1871	-0.00386351	0.0152412	0.062	8.15824
	10	3218	-0.00727475	0.0318494	0.062	8.15824
	19	1774	0.00630007	0.0254934	0.062	8.15824
	2	2730	-0.0110812	0.0444963	0.061	8.08299
	10	3246	0.0029231	0.0122544	0.061	8.08299
	15	3138	-0.00714119	0.0293651	0.061	8.08299
	2	1160	-0.00374681	0.0152339	0.06	8.00659
	2	1370	-0.0127584	0.0525347	0.06	8.00659
	2	1511	0.0138798	0.0559563	0.06	8.00659
	10	2454	-0.00550091	0.0238062	0.06	8.00659
	19	1926	0.00474181	0.0201294	0.06	8.00659
	2	214	0.0127989	0.0530364	0.059	7.92898
	2	2956	0.00742844	0.0304726	0.059	7.92898
	2	2650	0.00366307	0.0158944	0.058	7.85012
	17	1903	-0.0135488	0.0559697	0.058	7.85012
	2	805	-0.00663175	0.0280985	0.057	7.76998
	2	3302	-0.00621384	0.0268734	0.057	7.76998
	15	2549	-0.0102082	0.0443807	0.057	7.76998
	10	704	-0.00308739	0.0135504	0.056	7.68851
	10	2106	0.00513453	0.0219884	0.056	7.68851
	15	2255	-0.00583344	0.0255351	0.056	7.68851
	15	2871	-0.00851305	0.0363745	0.056	7.68851
	19	860	-0.00317864	0.0132299	0.056	7.68851
	10	1019	-0.00326808	0.0139447	0.055	7.60566
	10	2965	0.00379785	0.0169789	0.055	7.60566
	18	903	-0.00607729	0.026558	0.055	7.60566
	10	902	-0.00444605	0.0195698	0.054	7.52138
	10	1423	-0.00873943	0.0386488	0.054	7.52138
	17	1787	-0.00651056	0.0286749	0.054	7.52138
	17	3381	0.00475046	0.0207315	0.054	7.52138
	18	879	0.01066	0.0467939	0.054	7.52138
	19	3275	0.00374356	0.0162153	0.054	7.52138
	2	2100	-0.00233131	0.0100044	0.053	7.43561
	10	529	0.00347039	0.0159439	0.053	7.43561
	18	610	-0.00706964	0.0317236	0.053	7.43561
	2	651	0.0114947	0.0505888	0.052	7.3483
	10	825	0.00766946	0.0347474	0.052	7.3483
	15	103	0.00266366	0.0116656	0.052	7.3483
	18	3111	0.00924414	0.0413418	0.052	7.3483
	19	2622	0.0058505	0.0255183	0.052	7.3483
	2	2760	-0.00796651	0.0365955	0.051	7.25939
	2	2911	0.00433233	0.0199669	0.051	7.25939
	2	3301	-0.00982117	0.0447881	0.051	7.25939
	10	3260	0.00425682	0.01877	0.051	7.25939
	18	58	-0.00388771	0.017777	0.051	7.25939
	18	474	0.0100759	0.0446098	0.051	7.25939
	18	1426	0.0105063	0.047166	0.051	7.25939
	10	156	0.00326499	0.0151358	0.05	7.16882
	10	853	-0.00229969	0.0107609	0.05	7.16882
	10	2688	0.00466838	0.0235514	0.05	7.16882
	10	3261	-0.00626325	0.0290532	0.05	7.16882
	15	1200	0.00338387	0.0154794	0.05	7.16882
	15	2093	-0.00368864	0.0166677	0.05	7.16882
	15	2498	-0.00586911	0.0270675	0.05	7.16882
	17	2996	0.00948261	0.0440063	0.049	7.07651
	19	1075	0.00259788	0.0118871	0.049	7.07651
	19	2548	0.00258777	0.0115983	0.049	7.07651
	2	178	0.00396829	0.0178791	0.048	6.98239
	2	961	0.00585474	0.0277193	0.048	6.98239
	10	940	0.00420644	0.0197904	0.048	6.98239
	10	2073	-0.00886193	0.0424813	0.048	6.98239
	10	2208	-0.00268414	0.0135639	0.048	6.98239
	15	214	-0.00641919	0.0297894	0.048	6.98239
	18	2001	-0.00489479	0.0228104	0.048	6.98239
	2	206	0.00549474	0.026887	0.047	6.8864
	10	2674	0.00366502	0.0180685	0.047	6.8864
	15	2305	-0.00478577	0.0226244	0.047	6.8864
	2	704	0.00206898	0.0100142	0.046	6.78845
	2	2740	-0.00446901	0.0207845	0.046	6.78845
	10	2187	-0.00611216	0.0302315	0.046	6.78845
	15	1481	-0.00487596	0.0240831	0.046	6.78845
	17	225	0.00453807	0.0219043	0.046	6.78845
	2	737	-0.00819047	0.0408082	0.045	6.68844
	10	131	-0.00203347	0.0098784	0.045	6.68844
	10	2461	-0.00234215	0.0111683	0.045	6.68844
	15	2067	0.00813891	0.0392157	0.045	6.68844
	17	2580	-0.00577205	0.0300031	0.045	6.68844
	17	2871	-0.0082638	0.0400548	0.045	6.68844
	19	1490	-0.006079	0.0297101	0.045	6.68844
	2	3	0.00134843	0.00638939	0.044	6.5863
	2	2021	-0.00219882	0.0103999	0.044	6.5863
	10	407	0.00227414	0.0111998	0.044	6.5863
	10	880	0.00370722	0.0182087	0.044	6.5863
	10	2987	0.00468923	0.0242184	0.044	6.5863
	15	528	0.00466631	0.023658	0.044	6.5863
	17	1875	-0.00764713	0.0366082	0.044	6.5863
	2	641	0.00128534	0.00624088	0.043	6.48192
	2	952	-0.00090899	0.00436632	0.043	6.48192
	2	999	0.00400776	0.0197327	0.043	6.48192
	2	1200	-0.00451633	0.0222789	0.043	6.48192
	19	103	0.00152895	0.00808971	0.043	6.48192
	19	478	-0.00488322	0.0238542	0.043	6.48192
	10	838	-0.00471308	0.0238619	0.042	6.37519
	10	855	-0.00852458	0.0424894	0.042	6.37519
	10	3081	0.0045716	0.0227293	0.042	6.37519
	15	28	0.00225039	0.0111374	0.042	6.37519
	17	366	-0.00903523	0.0446164	0.042	6.37519
	2	457	-0.00217889	0.0110635	0.041	6.266
	10	822	0.00418339	0.0214085	0.041	6.266
	10	992	0.00490945	0.0252672	0.041	6.266
	10	1353	-0.00231395	0.0114786	0.041	6.266
	10	2384	0.00571984	0.0299582	0.041	6.266
	15	638	0.00111003	0.00753403	0.041	6.266
	15	1339	-0.00153851	0.00758952	0.041	6.266
	18	3168	-0.00501568	0.0269099	0.041	6.266
	10	1841	0.00311285	0.0158448	0.04	6.15424
	10	2472	0.00279349	0.0146391	0.04	6.15424
	10	2709	0.00629746	0.0332354	0.04	6.15424
	15	1975	0.00408167	0.0235019	0.04	6.15424
	18	2472	-0.00219403	0.0111275	0.04	6.15424
	19	975	-0.00201844	0.0105898	0.04	6.15424
	19	1481	-0.00315679	0.0164227	0.04	6.15424
	10	178	0.00227034	0.0118164	0.039	6.03976
	10	652	0.00180219	0.0093727	0.039	6.03976
	13	3370	-0.00937289	0.0471915	0.039	6.03976
	15	1255	0.00655356	0.0334782	0.039	6.03976
	18	79	-0.00431874	0.0228909	0.039	6.03976
	18	1999	-0.00531615	0.0273274	0.039	6.03976
	18	2640	-0.00572768	0.0299329	0.039	6.03976
	10	3029	-0.00389122	0.0208058	0.038	5.92244
	15	773	0.00180739	0.00974714	0.038	5.92244
	15	2953	0.00574564	0.030148	0.038	5.92244
	17	1639	-0.00210951	0.0107982	0.038	5.92244
	19	234	0.0024044	0.012597	0.038	5.92244
	19	240	-0.00408812	0.0211016	0.038	5.92244
	19	1551	-0.00140019	0.00728325	0.038	5.92244
	19	2187	0.00464897	0.0245794	0.038	5.92244
	19	2913	0.00358396	0.0186083	0.038	5.92244
	2	504	-0.00486581	0.0264827	0.037	5.80211
	10	274	-0.00211093	0.0114838	0.037	5.80211
	10	929	0.00326243	0.0170788	0.037	5.80211
	15	1618	-0.00279744	0.0168991	0.037	5.80211
	19	1689	0.00496939	0.0292146	0.037	5.80211
	2	86	0.00480252	0.0253852	0.036	5.67861
	2	3060	0.00704864	0.038653	0.036	5.67861
	6	809	0.00266155	0.013926	0.036	5.67861
	10	1538	-0.00326182	0.0174498	0.036	5.67861
	10	1624	0.0049995	0.0279171	0.036	5.67861
	15	2597	0.00634331	0.0350768	0.036	5.67861
	18	245	-0.00181946	0.010405	0.036	5.67861
	2	529	-0.00190799	0.0105728	0.035	5.55176
	2	2634	0.0015344	0.00851064	0.035	5.55176
	2	3383	-0.00572154	0.0333812	0.035	5.55176
	10	44	-0.00491096	0.0267087	0.035	5.55176
	13	1715	-0.00774314	0.0416556	0.035	5.55176
	15	534	-0.00226276	0.0124328	0.035	5.55176
	17	3340	0.00625259	0.0336467	0.035	5.55176
	19	1642	0.00244295	0.013107	0.035	5.55176
	2	837	-0.00356281	0.0204811	0.034	5.42137
	2	2172	0.00317049	0.0177421	0.034	5.42137
	2	2293	-0.0024269	0.0135029	0.034	5.42137
	10	61	0.00152881	0.00878046	0.034	5.42137
	10	662	0.00517413	0.0292095	0.034	5.42137
	10	979	0.00169167	0.00926174	0.034	5.42137
	10	1054	-0.00100146	0.00613777	0.034	5.42137
	10	2134	-0.00214839	0.011875	0.034	5.42137
	15	888	-0.0049174	0.0278569	0.034	5.42137
	19	1593	0.00592998	0.0331009	0.034	5.42137
	2	370	0.00248325	0.0140799	0.033	5.28723
	10	2908	0.00305169	0.0181765	0.033	5.28723
	15	75	-0.0041491	0.0241864	0.033	5.28723
	15	3383	0.00600283	0.0339087	0.033	5.28723
	17	2815	-0.00279376	0.0157923	0.033	5.28723
	18	57	-0.00685219	0.0384217	0.033	5.28723
	18	918	-0.00249876	0.0149279	0.033	5.28723
	18	1052	0.00172355	0.00993761	0.033	5.28723
	18	1670	0.00222302	0.0126996	0.033	5.28723
	18	2154	0.00675498	0.0380379	0.033	5.28723
	18	2325	0.00361753	0.020713	0.033	5.28723
	19	238	-0.00419637	0.0248855	0.033	5.28723
	19	810	0.00223419	0.0122591	0.033	5.28723
	19	1116	-0.00378589	0.021248	0.033	5.28723
	2	1241	-0.00615874	0.0358202	0.032	5.1491
	2	1583	-0.00217173	0.0129269	0.032	5.1491
	10	220	-0.00225251	0.012694	0.032	5.1491
	10	312	-0.00184455	0.0105839	0.032	5.1491
	10	592	-0.00126491	0.00717466	0.032	5.1491
	10	1667	-0.00238644	0.013683	0.032	5.1491
	10	3319	0.00547529	0.0328672	0.032	5.1491
	15	1469	-0.00384194	0.0217985	0.032	5.1491
	15	3117	-0.00095822	0.00546113	0.032	5.1491
	15	3224	0.00453543	0.0269106	0.032	5.1491
	17	3133	-0.00731977	0.0414734	0.032	5.1491
	18	2020	-0.00307342	0.0173519	0.032	5.1491
	19	79	-0.00296021	0.0164973	0.032	5.1491
	19	881	-0.00533342	0.0309363	0.032	5.1491
	2	2140	-0.00151053	0.00863314	0.031	5.00673
	2	2200	-0.00275883	0.0158758	0.031	5.00673
	2	2275	-0.0024507	0.0145398	0.031	5.00673
	2	3096	-0.00321218	0.0190735	0.031	5.00673
	2	3375	0.0066086	0.0386199	0.031	5.00673
	10	386	0.00192831	0.0115314	0.031	5.00673
	10	2348	-0.00287261	0.0165049	0.031	5.00673
	10	2764	0.0016581	0.00973793	0.031	5.00673
	15	1585	0.0014979	0.00851108	0.031	5.00673
	15	1946	-0.00675789	0.0387217	0.031	5.00673
	15	2187	0.00355928	0.0210147	0.031	5.00673
	15	3227	-0.00179067	0.010527	0.031	5.00673
	17	158	0.00096559	0.00544515	0.031	5.00673
	17	800	-0.00119675	0.00682968	0.031	5.00673
	19	1218	-0.00085325	0.00489138	0.031	5.00673
	19	2721	0.00316565	0.0183768	0.031	5.00673
	19	3351	-0.00342833	0.0195611	0.031	5.00673
	2	899	-0.00152835	0.00907726	0.03	4.85985
	2	2804	0.00163331	0.0102012	0.03	4.85985
	10	41	0.00273789	0.0162197	0.03	4.85985
	10	934	0.00403154	0.0241834	0.03	4.85985
	10	2231	-0.00327485	0.0215167	0.03	4.85985
	15	235	0.0058096	0.0346163	0.03	4.85985
	15	338	-0.00256675	0.0153526	0.03	4.85985
	15	1860	-0.00362853	0.022297	0.03	4.85985
	15	2172	-0.00274224	0.016184	0.03	4.85985
	17	1408	-0.00454598	0.0272192	0.03	4.85985
	18	1621	0.00270169	0.016034	0.03	4.85985
	18	1635	-0.0032361	0.0193094	0.03	4.85985
	18	2650	0.00400319	0.0239361	0.03	4.85985
	19	1377	0.00249453	0.0152282	0.03	4.85985
	19	2212	0.00150736	0.00942524	0.03	4.85985
	19	3117	-0.00109043	0.00643786	0.03	4.85985
	19	3196	0.00263067	0.0157608	0.03	4.85985
	2	93	0.00245605	0.0144681	0.029	4.70814
	2	249	-0.00349488	0.021451	0.029	4.70814
	2	880	-0.00205223	0.0124305	0.029	4.70814
	2	1458	0.0033096	0.0197695	0.029	4.70814
	15	238	-0.00393844	0.0245812	0.029	4.70814
	15	1408	-0.00442883	0.0267227	0.029	4.70814
	15	3133	-0.00565336	0.0349889	0.029	4.70814
	17	79	0.00366333	0.0214073	0.029	4.70814
	17	81	0.00571453	0.0348001	0.029	4.70814
	17	1055	0.00506933	0.0299818	0.029	4.70814
	17	2131	0.00217562	0.0131175	0.029	4.70814
	18	1727	0.00105236	0.00623205	0.029	4.70814
	18	2821	-0.00345653	0.0202283	0.029	4.70814
	19	1469	-0.00334834	0.0206028	0.029	4.70814
	19	1549	-0.00437614	0.0260117	0.029	4.70814
	10	1251	0.00234646	0.0147289	0.028	4.55127
	10	2503	-0.00165951	0.00996335	0.028	4.55127
	10	2748	-0.00113373	0.00717895	0.028	4.55127
	15	1169	-0.00522047	0.0320423	0.028	4.55127
	15	2032	0.00386082	0.0245722	0.028	4.55127
	18	1016	0.00603123	0.0368119	0.028	4.55127
	18	2435	-0.00483938	0.0296552	0.028	4.55127
	18	2996	-0.00234772	0.0146851	0.028	4.55127
	19	75	-0.00401374	0.0258298	0.028	4.55127
	19	1751	-0.0028901	0.0174834	0.028	4.55127
	19	3312	0.00397317	0.0255882	0.028	4.55127
	2	188	-0.00092858	0.00581868	0.027	4.38886
	2	1455	-0.00488138	0.031003	0.027	4.38886
	2	1974	0.00365114	0.0226038	0.027	4.38886
	2	2588	-0.00477626	0.0315091	0.027	4.38886
	2	2739	0.00346969	0.0215721	0.027	4.38886
	2	2864	0.00264794	0.0163349	0.027	4.38886
	2	3020	0.00212328	0.0132031	0.027	4.38886
	10	443	0.00063768	0.00388123	0.027	4.38886
	10	1864	-0.00090116	0.00619446	0.027	4.38886
	10	2381	0.00210599	0.0142085	0.027	4.38886
	10	3109	-0.00147576	0.0100027	0.027	4.38886
	13	1946	0.00620686	0.0381094	0.027	4.38886
	15	327	0.00192756	0.0119804	0.027	4.38886
	15	834	0.00141499	0.00913053	0.027	4.38886
	15	2332	0.00537524	0.0342962	0.027	4.38886
	15	2815	-0.00173799	0.0106629	0.027	4.38886
	15	3262	0.00158757	0.00978908	0.027	4.38886
	15	3378	-0.00188762	0.0118931	0.027	4.38886
	17	398	0.00086903	0.00535878	0.027	4.38886
	17	720	-0.00130752	0.00853549	0.027	4.38886
	17	3060	-0.00517986	0.0329382	0.027	4.38886
	19	390	-0.00212224	0.0130359	0.027	4.38886
	19	1393	0.0008084	0.00525561	0.027	4.38886
	2	1778	-0.00111919	0.0070204	0.026	4.2205
	2	2791	0.00166456	0.010628	0.026	4.2205
	2	3240	0.0022125	0.0141052	0.026	4.2205
	10	309	-0.00394814	0.0250656	0.026	4.2205
	10	356	-0.00301278	0.019505	0.026	4.2205
	10	605	-0.00161024	0.010295	0.026	4.2205
	10	1012	-0.00269738	0.0174931	0.026	4.2205
	10	1416	-0.00199752	0.0126979	0.026	4.2205
	10	1812	-0.00309662	0.020384	0.026	4.2205
	10	2903	0.00117124	0.00740954	0.026	4.2205
	15	3072	0.0036442	0.0260539	0.026	4.2205
	17	903	0.00565383	0.0353047	0.026	4.2205
	18	1033	0.00297065	0.0186037	0.026	4.2205
	18	3139	0.00219822	0.0143114	0.026	4.2205
	19	1275	-0.00430161	0.0272518	0.026	4.2205
	1	1816	-0.00260964	0.0165643	0.025	4.04571
	2	881	0.00436311	0.0285205	0.025	4.04571
	2	3213	-0.00264996	0.0175587	0.025	4.04571
	10	1825	0.00221105	0.0148856	0.025	4.04571
	15	430	0.00274986	0.0200776	0.025	4.04571
	15	1855	-0.00113885	0.00718891	0.025	4.04571
	15	2912	-0.00137881	0.00870537	0.025	4.04571
	17	2673	0.00212267	0.0135372	0.025	4.04571
	17	2872	0.0016076	0.010545	0.025	4.04571
	17	3111	-0.00427613	0.0275216	0.025	4.04571
	18	940	-0.0023806	0.0156394	0.025	4.04571
	18	1199	0.00047471	0.0030104	0.025	4.04571
	18	1305	-0.00249147	0.0162273	0.025	4.04571
	18	1780	0.00069958	0.00444364	0.025	4.04571
	19	1138	0.00337967	0.0222579	0.025	4.04571
	19	1254	0.00203661	0.0132773	0.025	4.04571
	19	2206	0.00064791	0.00413082	0.025	4.04571
	19	2648	-0.00211876	0.0144039	0.025	4.04571
	19	3221	0.00057442	0.00378747	0.025	4.04571
	2	870	0.00149521	0.00981163	0.024	3.86397
	2	882	-0.00033423	0.00215007	0.024	3.86397
	2	1305	-0.00334924	0.0221154	0.024	3.86397
	2	1510	0.00257738	0.0168744	0.024	3.86397
	2	1782	0.00068045	0.00441199	0.024	3.86397
	10	954	-0.00247991	0.0167821	0.024	3.86397
	10	1759	0.00250953	0.0172325	0.024	3.86397
	10	2650	-0.00311969	0.0212568	0.024	3.86397
	15	871	0.0016722	0.010867	0.024	3.86397
	15	1801	0.00356634	0.0241627	0.024	3.86397
	15	2692	-0.00108465	0.00755538	0.024	3.86397
	15	3236	0.00254681	0.0171248	0.024	3.86397
	15	3276	-0.00240494	0.015821	0.024	3.86397
	18	1308	0.0018063	0.0118643	0.024	3.86397
	19	906	0.002386	0.0167607	0.024	3.86397
	19	1080	0.00074574	0.0048662	0.024	3.86397
	21	2131	0.00240237	0.0155523	0.024	3.86397
	2	338	0.00195081	0.0138414	0.023	3.67468
	2	968	-0.00089411	0.00594783	0.023	3.67468
	2	1696	-0.00217643	0.0147788	0.023	3.67468
	10	413	0.00281533	0.0190232	0.023	3.67468
	10	1050	-0.00277154	0.020884	0.023	3.67468
	10	1161	0.00285219	0.0205246	0.023	3.67468
	10	1311	-0.0007399	0.00500375	0.023	3.67468
	10	2234	-0.00100257	0.0066125	0.023	3.67468
	10	3197	-0.00138588	0.00968527	0.023	3.67468
	13	626	0.00549936	0.036289	0.023	3.67468
	15	651	-0.00503915	0.0338684	0.023	3.67468
	15	999	-0.00282748	0.020838	0.023	3.67468
	15	1288	0.00083616	0.00607353	0.023	3.67468
	15	1593	0.00304126	0.0222638	0.023	3.67468
	15	1766	-0.00198057	0.0131947	0.023	3.67468
	15	2954	0.00209272	0.0155056	0.023	3.67468
	15	3126	-0.00379983	0.0258105	0.023	3.67468
	17	1016	-0.0041413	0.0293045	0.023	3.67468
	18	2127	-0.00112563	0.00769364	0.023	3.67468
	18	2871	0.00426097	0.0289989	0.023	3.67468
	19	92	0.00121119	0.00864928	0.023	3.67468
	19	2585	0.0037743	0.0266396	0.023	3.67468
	2	75	0.00259761	0.0189434	0.022	3.47719
	2	384	-0.00112359	0.00802837	0.022	3.47719
	2	963	-0.00186194	0.0131519	0.022	3.47719
	2	1602	-0.00297952	0.0204673	0.022	3.47719
	2	1953	0.00138335	0.0102027	0.022	3.47719
	10	23	0.00192973	0.0133442	0.022	3.47719
	10	457	0.00061116	0.00455569	0.022	3.47719
	10	897	0.00120457	0.00863396	0.022	3.47719
	10	1175	-0.00129765	0.0100495	0.022	3.47719
	10	1529	0.00140995	0.0101166	0.022	3.47719
	10	1678	-0.00028371	0.00212444	0.022	3.47719
	10	2118	-0.0020215	0.0146485	0.022	3.47719
	10	2323	0.00121677	0.00842038	0.022	3.47719
	15	474	-0.00370158	0.0262425	0.022	3.47719
	15	1825	0.00173346	0.0120859	0.022	3.47719
	15	2220	0.00277995	0.0195353	0.022	3.47719
	15	3082	0.00094972	0.00638346	0.022	3.47719
	15	3265	-0.00380121	0.0264688	0.022	3.47719
	17	2154	-0.00497573	0.034238	0.022	3.47719
	17	2640	0.00347452	0.0239855	0.022	3.47719
	17	2804	-0.00124359	0.0085926	0.022	3.47719
	19	2093	-0.00142654	0.01064	0.022	3.47719
	19	2180	-0.00162249	0.0114237	0.022	3.47719
	2	2054	-0.00129101	0.00928737	0.021	3.27072
	2	2484	-0.00092655	0.00775618	0.021	3.27072
	2	2758	0.00147495	0.010256	0.021	3.27072
	10	217	0.00136544	0.00988651	0.021	3.27072
	10	421	-0.00168683	0.012245	0.021	3.27072
	10	1568	0.00151662	0.0106125	0.021	3.27072
	10	1721	0.00118313	0.00849684	0.021	3.27072
	10	2131	0.0022102	0.0161669	0.021	3.27072
	10	2687	-0.00088981	0.0066695	0.021	3.27072
	10	3125	0.00212262	0.0149056	0.021	3.27072
	15	50	0.00063384	0.00526633	0.021	3.27072
	15	259	0.0034215	0.0260605	0.021	3.27072
	15	720	-0.00138216	0.010487	0.021	3.27072
	15	1518	-0.0004209	0.00297815	0.021	3.27072
	15	2494	-0.00361667	0.0263968	0.021	3.27072
	15	3244	-0.00168386	0.0119771	0.021	3.27072
	18	2103	0.00047742	0.00474977	0.021	3.27072
	18	3017	0.00171013	0.0124154	0.021	3.27072
	19	145	0.00128099	0.00886242	0.021	3.27072
	19	316	0.00104084	0.0075178	0.021	3.27072
	19	879	0.00275442	0.0193784	0.021	3.27072
	19	1001	0.00114493	0.0080606	0.021	3.27072
	19	1105	-0.00150735	0.010893	0.021	3.27072
	19	1226	-0.00088131	0.00616623	0.021	3.27072
	1	117	-0.00105286	0.0074245	0.02	3.05439
	2	119	-0.00190988	0.0138713	0.02	3.05439
	2	154	0.00098544	0.00737378	0.02	3.05439
	2	855	0.00382805	0.02832	0.02	3.05439
	2	898	0.00148092	0.0110646	0.02	3.05439
	2	1053	0.00168709	0.0122118	0.02	3.05439
	2	3373	-0.00236478	0.0173939	0.02	3.05439
	10	177	-0.00227806	0.0177008	0.02	3.05439
	10	353	0.00052608	0.00437599	0.02	3.05439
	10	667	-0.0008708	0.00709249	0.02	3.05439
	10	3100	0.00228277	0.0168429	0.02	3.05439
	15	850	0.00229336	0.0170635	0.02	3.05439
	15	1105	-0.00101606	0.00736752	0.02	3.05439
	15	1601	-0.00104004	0.007613	0.02	3.05439
	15	1929	-0.0007383	0.00538546	0.02	3.05439
	15	1941	0.00305632	0.0234577	0.02	3.05439
	15	2610	0.00123855	0.00900243	0.02	3.05439
	17	440	-0.00223539	0.0162937	0.02	3.05439
	17	1459	0.00092689	0.00672767	0.02	3.05439
	17	2488	-0.0010773	0.00763448	0.02	3.05439
	18	239	0.00081568	0.00584105	0.02	3.05439
	18	600	0.00116528	0.00826514	0.02	3.05439
	18	640	0.00237958	0.0180017	0.02	3.05439
	18	819	0.00143584	0.0103245	0.02	3.05439
	18	822	-0.00198878	0.0146955	0.02	3.05439
	19	762	0.00337156	0.025232	0.02	3.05439
	19	1161	-0.00209088	0.0160456	0.02	3.05439
	2	176	-0.00241893	0.0181156	0.019	2.8272
	2	446	-0.0008592	0.00660129	0.019	2.8272
	2	1982	-0.00192514	0.0142296	0.019	2.8272
	2	3057	0.00077887	0.00597337	0.019	2.8272
	6	1715	-0.00377163	0.0275069	0.019	2.8272
	10	167	-0.00101513	0.00757039	0.019	2.8272
	10	299	0.00101461	0.00744071	0.019	2.8272
	10	1426	-0.00325532	0.0250306	0.019	2.8272
	10	1490	0.00197021	0.0152234	0.019	2.8272
	10	1630	0.00199194	0.0150824	0.019	2.8272
	10	1668	0.00184062	0.0134099	0.019	2.8272
	10	2668	-0.00138222	0.0102722	0.019	2.8272
	15	273	0.00238185	0.0185443	0.019	2.8272
	15	478	-0.00147811	0.0107283	0.019	2.8272
	15	548	0.00039856	0.00295011	0.019	2.8272
	15	1117	-0.00023296	0.00168408	0.019	2.8272
	15	2635	-0.00130015	0.00943988	0.019	2.8272
	17	2228	-0.00056258	0.00417278	0.019	2.8272
	17	2646	-0.00416512	0.0307148	0.019	2.8272
	19	198	-0.0013159	0.0127335	0.019	2.8272
	19	1101	-0.00146243	0.0109686	0.019	2.8272
	19	2813	0.00237195	0.0178847	0.019	2.8272
	19	3237	-0.00108403	0.0087047	0.019	2.8272
	2	885	-0.00111614	0.00862325	0.018	2.58796
	2	888	0.00180392	0.0146448	0.018	2.58796
	2	1858	-0.00312454	0.0246501	0.018	2.58796
	2	3133	0.00337452	0.0259143	0.018	2.58796
	10	821	-0.00031918	0.00237135	0.018	2.58796
	10	1139	-0.00157365	0.012237	0.018	2.58796
	10	1431	0.00100018	0.00811576	0.018	2.58796
	10	1622	-0.00073121	0.00555775	0.018	2.58796
	10	2180	0.00097067	0.00740621	0.018	2.58796
	10	2916	0.00146165	0.0112813	0.018	2.58796
	10	3053	0.00131795	0.0111277	0.018	2.58796
	10	3066	-0.00117396	0.00935193	0.018	2.58796
	10	3096	0.00151806	0.0129553	0.018	2.58796
	15	178	-0.00204794	0.0158154	0.018	2.58796
	15	710	0.00057019	0.00435857	0.018	2.58796
	15	1034	0.0018746	0.0145588	0.018	2.58796
	15	1833	-0.00256499	0.0209777	0.018	2.58796
	15	2673	0.00111917	0.00854529	0.018	2.58796
	15	3086	0.00155808	0.0121663	0.018	2.58796
	17	235	0.00337332	0.0259926	0.018	2.58796
	17	999	-0.00173433	0.0137726	0.018	2.58796
	18	1042	0.00128112	0.0096938	0.018	2.58796
	18	1190	0.00171806	0.0130764	0.018	2.58796
	18	1280	0.00066315	0.00501029	0.018	2.58796
	18	1414	0.00251459	0.0194185	0.018	2.58796
	18	3377	0.00102317	0.00770585	0.018	2.58796
	19	555	0.0008461	0.00651074	0.018	2.58796
	19	1677	-0.00038927	0.00311642	0.018	2.58796
	19	1725	0.00075284	0.00593799	0.018	2.58796
	2	291	0.00266599	0.0220209	0.017	2.33531
	2	1128	-0.00115234	0.00901319	0.017	2.33531
	2	1337	-0.00113557	0.00992138	0.017	2.33531
	2	2639	-0.00088367	0.00732044	0.017	2.33531
	2	2724	0.00207721	0.0173544	0.017	2.33531
	10	67	0.00088752	0.00732009	0.017	2.33531
	10	785	-0.00068987	0.00618721	0.017	2.33531
	10	1049	0.001411	0.0112284	0.017	2.33531
	10	1473	-0.00098094	0.00793504	0.017	2.33531
	10	1584	-0.00177726	0.0147949	0.017	2.33531
	10	1916	-0.00074783	0.00641879	0.017	2.33531
	10	2138	0.00114525	0.00898826	0.017	2.33531
	10	2299	-0.00082426	0.00648262	0.017	2.33531
	10	3060	-0.00265927	0.0216335	0.017	2.33531
	10	3118	0.00157578	0.012755	0.017	2.33531
	10	3282	0.00180591	0.0165758	0.017	2.33531
	15	492	-0.00055005	0.00423589	0.017	2.33531
	15	800	-0.00072879	0.00592458	0.017	2.33531
	17	179	0.00103588	0.00804151	0.017	2.33531
	17	1255	0.00310321	0.0249093	0.017	2.33531
	17	1275	-0.00380546	0.0292498	0.017	2.33531
	17	1633	-0.00231252	0.0180954	0.017	2.33531
	18	2681	0.00167861	0.0130645	0.017	2.33531
	18	2693	-0.00048466	0.00373009	0.017	2.33531
	19	353	-0.00129562	0.0103822	0.017	2.33531
	19	850	0.00163366	0.0128569	0.017	2.33531
	19	909	-0.00065719	0.00671883	0.017	2.33531
	19	970	-0.00089909	0.00712325	0.017	2.33531
	19	1588	-0.00065787	0.00511176	0.017	2.33531
	19	2164	0.00018888	0.00148637	0.017	2.33531
	19	3179	0.0012491	0.00984547	0.017	2.33531
	1	1549	0.00351948	0.0279977	0.016	2.0676
	2	58	-0.00151808	0.0123529	0.016	2.0676
	2	957	-0.00127643	0.0103645	0.016	2.0676
	2	987	0.00052227	0.00410434	0.016	2.0676
	2	1395	0.00147617	0.0118988	0.016	2.0676
	2	1825	-0.00154678	0.0128188	0.016	2.0676
	2	2197	0.00069637	0.00576613	0.016	2.0676
	2	2967	-0.00069385	0.00555636	0.016	2.0676
	4	1715	-0.00332639	0.02688	0.016	2.0676
	10	173	-0.00119899	0.0100398	0.016	2.0676
	10	586	0.00096396	0.00817371	0.016	2.0676
	10	799	-0.00143518	0.0115663	0.016	2.0676
	10	815	0.00088874	0.00754281	0.016	2.0676
	10	1247	-0.00283515	0.0238101	0.016	2.0676
	10	1571	-0.00085853	0.00747159	0.016	2.0676
	10	1717	0.00080384	0.0068075	0.016	2.0676
	10	1742	0.00128338	0.0104449	0.016	2.0676
	10	2438	-0.00044503	0.00398113	0.016	2.0676
	10	2529	0.00073799	0.00611793	0.016	2.0676
	10	2542	0.00070109	0.00571615	0.016	2.0676
	10	2565	-0.00071187	0.00602662	0.016	2.0676
	10	2968	0.00159026	0.0169586	0.016	2.0676
	10	3058	-0.00065494	0.00534437	0.016	2.0676
	15	600	-0.00172344	0.0144753	0.016	2.0676
	15	1130	0.00102648	0.00899979	0.016	2.0676
	15	1458	-0.00219366	0.0179751	0.016	2.0676
	15	1588	-0.00053942	0.00463193	0.016	2.0676
	15	1598	0.00118436	0.0098405	0.016	2.0676
	15	1642	0.00107693	0.00934825	0.016	2.0676
	15	2117	0.00185463	0.0155555	0.016	2.0676
	15	3144	-0.00129473	0.0104572	0.016	2.0676
	17	154	-0.0011183	0.00908885	0.016	2.0676
	17	2332	0.00323027	0.0274773	0.016	2.0676
	17	3144	-0.00215805	0.0182382	0.016	2.0676
	18	81	-0.00309063	0.0249625	0.016	2.0676
	18	400	0.00120935	0.00973547	0.016	2.0676
	18	599	0.00164676	0.0138913	0.016	2.0676
	18	2041	-0.00131396	0.0111417	0.016	2.0676
	18	2707	0.00077548	0.00631279	0.016	2.0676
	19	904	-0.00240518	0.0205012	0.016	2.0676
	19	2843	-0.00085442	0.0070514	0.016	2.0676
	2	115	0.00126187	0.010544	0.015	1.7829
	2	959	0.00104846	0.00880825	0.015	1.7829
	2	1042	0.00121823	0.0106486	0.015	1.7829
	2	1311	-0.00052962	0.0046005	0.015	1.7829
	2	1707	0.00077754	0.00637057	0.015	1.7829
	2	1970	-0.00046369	0.00449468	0.015	1.7829
	2	2229	0.0019978	0.0166016	0.015	1.7829
	2	2517	0.00294656	0.0246956	0.015	1.7829
	2	2521	-0.00224855	0.0196645	0.015	1.7829
	2	2715	-0.00059752	0.00504337	0.015	1.7829
	2	2764	-0.00121571	0.0123436	0.015	1.7829
	2	3108	0.0007303	0.00623083	0.015	1.7829
	2	3171	0.00198711	0.0174812	0.015	1.7829
	2	3223	0.00089819	0.00764882	0.015	1.7829
	10	400	-0.00114471	0.00977963	0.015	1.7829
	10	425	-0.00034349	0.00329425	0.015	1.7829
	10	809	-0.00085019	0.00725144	0.015	1.7829
	10	883	-0.00181848	0.0162122	0.015	1.7829
	10	1527	0.00146406	0.0129524	0.015	1.7829
	10	1575	0.00103459	0.00869083	0.015	1.7829
	10	1576	-0.00177246	0.0159575	0.015	1.7829
	10	1957	-0.00060682	0.00502963	0.015	1.7829
	10	1982	-0.00091898	0.0079273	0.015	1.7829
	10	2160	-0.00076968	0.00712674	0.015	1.7829
	10	2401	0.00045777	0.00375496	0.015	1.7829
	10	2628	0.0017487	0.0162227	0.015	1.7829
	10	2632	-0.00087565	0.00762745	0.015	1.7829
	10	3070	0.00062434	0.00535123	0.015	1.7829
	10	3349	0.00269505	0.0224171	0.015	1.7829
	13	335	-0.00076709	0.00636625	0.015	1.7829
	13	444	-0.00068013	0.00561457	0.015	1.7829
	13	2896	0.00101246	0.00843365	0.015	1.7829
	15	197	-0.00061904	0.00520118	0.015	1.7829
	15	1048	0.00096702	0.00798343	0.015	1.7829
	15	1138	0.00205119	0.0174082	0.015	1.7829
	15	1689	0.00203371	0.0175452	0.015	1.7829
	15	2573	-0.00222291	0.0200131	0.015	1.7829
	15	3062	-0.00089768	0.00744046	0.015	1.7829
	15	3282	-0.0022911	0.0202264	0.015	1.7829
	17	1308	-0.00115099	0.00978252	0.015	1.7829
	17	1426	-0.00297788	0.0249146	0.015	1.7829
	17	2020	0.00189734	0.0163232	0.015	1.7829
	17	2325	-0.00165474	0.0142675	0.015	1.7829
	17	2663	-0.00121488	0.00998842	0.015	1.7829
	18	202	-0.0016329	0.0134702	0.015	1.7829
	18	2796	-0.00118575	0.0103331	0.015	1.7829
	19	624	0.00141276	0.0123024	0.015	1.7829
	19	2472	-0.00091449	0.00809431	0.015	1.7829
	19	2558	-0.00054811	0.00464879	0.015	1.7829
	19	2597	0.00252587	0.0209893	0.015	1.7829
	21	1564	0.00062786	0.00512	0.015	1.7829
	2	81	-0.00247312	0.0224737	0.014	1.47886
	2	1425	-0.00210421	0.0189451	0.014	1.47886
	2	1529	-0.00170983	0.0157005	0.014	1.47886
	2	2012	-0.00106769	0.0095954	0.014	1.47886
	2	2141	0.00167482	0.0151341	0.014	1.47886
	2	2884	-0.00157826	0.0141893	0.014	1.47886
	2	3227	0.00053506	0.00530218	0.014	1.47886
	2	3312	-0.00149387	0.0133486	0.014	1.47886
	10	65	-0.0021371	0.0197672	0.014	1.47886
	10	176	0.00073714	0.0079836	0.014	1.47886
	10	323	0.00052591	0.00444867	0.014	1.47886
	10	690	-0.00079622	0.00702107	0.014	1.47886
	10	901	-0.00049628	0.00443547	0.014	1.47886
	10	1030	-0.00109166	0.00994754	0.014	1.47886
	10	1483	0.00096121	0.00955926	0.014	1.47886
	10	1563	-0.00094505	0.00941842	0.014	1.47886
	10	1805	-0.00083078	0.0080966	0.014	1.47886
	10	3258	0.00079474	0.00759096	0.014	1.47886
	15	296	-0.00057215	0.00527876	0.014	1.47886
	15	728	-0.00087589	0.0078585	0.014	1.47886
	15	762	0.00223488	0.0193845	0.014	1.47886
	15	813	0.00058006	0.00517207	0.014	1.47886
	15	1061	-0.00265688	0.0236112	0.014	1.47886
	15	1320	0.00074401	0.00669256	0.014	1.47886
	15	2288	-0.00093913	0.00836506	0.014	1.47886
	15	2804	-0.00066745	0.00596992	0.014	1.47886
	17	606	-0.00240029	0.0212125	0.014	1.47886
	17	860	0.00030216	0.00259022	0.014	1.47886
	17	1207	0.00099252	0.0091709	0.014	1.47886
	17	2440	-0.00083737	0.00738173	0.014	1.47886
	18	311	-0.00062265	0.00578198	0.014	1.47886
	18	1798	0.00068527	0.00608571	0.014	1.47886
	18	2062	0.00201931	0.0177161	0.014	1.47886
	19	68	0.0011528	0.0100051	0.014	1.47886
	19	457	0.00092263	0.00798222	0.014	1.47886
	19	475	0.00047901	0.00422609	0.014	1.47886
	19	732	0.00064068	0.00546543	0.014	1.47886
	19	1825	0.0009002	0.00775629	0.014	1.47886
	19	2688	-0.00056356	0.00517616	0.014	1.47886
	19	2918	0.00095734	0.00849032	0.014	1.47886
	19	3383	0.00184945	0.016567	0.014	1.47886
	2	288	-0.00072481	0.00637843	0.013	1.15261
	2	599	0.00114104	0.0112441	0.013	1.15261
	2	662	-0.00215775	0.0210536	0.013	1.15261
	2	729	-0.00071961	0.00690579	0.013	1.15261
	2	1016	0.00161332	0.0176006	0.013	1.15261
	2	1348	0.00141267	0.0130993	0.013	1.15261
	2	1864	0.00093032	0.00844596	0.013	1.15261
	2	2013	-0.00151539	0.0142444	0.013	1.15261
	2	2313	-0.000361	0.00341282	0.013	1.15261
	2	2473	0.00105849	0.00973246	0.013	1.15261
	2	3122	0.00067239	0.00644048	0.013	1.15261
	2	3181	0.00055347	0.00540563	0.013	1.15261
	10	225	0.00133727	0.0120415	0.013	1.15261
	10	271	-0.00088973	0.00852172	0.013	1.15261
	10	459	0.00027639	0.00245038	0.013	1.15261
	10	499	-0.00085337	0.00775943	0.013	1.15261
	10	1419	-0.00107662	0.012251	0.013	1.15261
	10	1548	-0.00119634	0.0106496	0.013	1.15261
	10	1767	0.00109169	0.0123609	0.013	1.15261
	10	2063	0.00125282	0.0114628	0.013	1.15261
	10	2430	-0.0004121	0.00387502	0.013	1.15261
	10	2536	0.00092561	0.0104603	0.013	1.15261
	10	2898	0.00028872	0.00284699	0.013	1.15261
	10	3048	-0.00145068	0.0128174	0.013	1.15261
	10	3148	0.00083108	0.00797427	0.013	1.15261
	10	3233	-0.00021323	0.00195637	0.013	1.15261
	15	219	-0.00041905	0.00389831	0.013	1.15261
	15	993	0.00023272	0.00271552	0.013	1.15261
	15	1434	0.00115117	0.0110837	0.013	1.15261
	15	1498	-0.00067455	0.00639325	0.013	1.15261
	15	1754	0.00107619	0.0106839	0.013	1.15261
	15	1768	-0.00129169	0.0117152	0.013	1.15261
	15	2336	0.00049934	0.00503663	0.013	1.15261
	15	2900	0.00113509	0.0100477	0.013	1.15261
	15	3049	-0.00199904	0.018628	0.013	1.15261
	17	474	-0.00177077	0.016412	0.013	1.15261
	17	1076	0.0007336	0.00661827	0.013	1.15261
	17	2027	0.00069646	0.00643942	0.013	1.15261
	17	2032	0.00214553	0.0196507	0.013	1.15261
	17	2435	0.0017171	0.0162517	0.013	1.15261
	17	2740	0.00189131	0.0174085	0.013	1.15261
	17	3121	-0.00068885	0.00631886	0.013	1.15261
	18	902	0.00103591	0.00919199	0.013	1.15261
	18	2078	0.00132974	0.0122498	0.013	1.15261
	18	2410	0.0002724	0.00239024	0.013	1.15261
	19	499	0.00103673	0.00940482	0.013	1.15261
	19	560	-0.00060198	0.00565582	0.013	1.15261
	19	600	-0.00092136	0.00881705	0.013	1.15261
	19	1185	0.00180996	0.0172749	0.013	1.15261
	19	1224	-0.00145748	0.0131768	0.013	1.15261
	19	2917	-0.00207514	0.0189928	0.013	1.15261
	21	1903	-0.00236859	0.0213989	0.013	1.15261
	2	23	0.00107766	0.00985416	0.012	0.800595
	2	143	0.00054072	0.00499669	0.012	0.800595
	2	432	-0.00156486	0.0153128	0.012	0.800595
	2	762	-0.00169384	0.0175891	0.012	0.800595
	2	940	-0.00085766	0.0087832	0.012	0.800595
	2	1223	-0.00047784	0.00490546	0.012	0.800595
	2	1407	0.00046846	0.00467886	0.012	0.800595
	2	1861	0.00048797	0.00476904	0.012	0.800595
	2	2231	0.00114459	0.0117231	0.012	0.800595
	2	2872	-0.00064579	0.00614403	0.012	0.800595
	2	2880	0.00034444	0.00314412	0.012	0.800595
	2	3072	-0.00158458	0.0155435	0.012	0.800595
	2	3172	0.00231911	0.0223753	0.012	0.800595
	2	3220	-0.00070435	0.00668244	0.012	0.800595
	10	152	0.00029869	0.0039991	0.012	0.800595
	10	174	-0.00087461	0.00827737	0.012	0.800595
	10	433	0.00041448	0.00440428	0.012	0.800595
	10	587	0.00083736	0.00827273	0.012	0.800595
	10	628	0.00118422	0.0147658	0.012	0.800595
	10	718	0.00155932	0.0188439	0.012	0.800595
	10	973	0.00077063	0.00798001	0.012	0.800595
	10	1033	-0.00080863	0.00813998	0.012	0.800595
	10	1046	0.00064258	0.00617328	0.012	0.800595
	10	1494	-0.00060144	0.00616226	0.012	0.800595
	10	1774	-0.00064272	0.00673152	0.012	0.800595
	10	2067	0.00101052	0.0108567	0.012	0.800595
	10	2233	0.00144198	0.0143033	0.012	0.800595
	10	2262	0.00084057	0.00839625	0.012	0.800595
	10	2435	0.00088363	0.00957921	0.012	0.800595
	10	2479	0.0008762	0.00948774	0.012	0.800595
	10	2521	0.00102864	0.0107208	0.012	0.800595
	10	2616	-0.00091496	0.0101872	0.012	0.800595
	10	2966	0.0004157	0.00378622	0.012	0.800595
	10	3141	-0.00023616	0.00215729	0.012	0.800595
	10	3336	0.0015017	0.0155826	0.012	0.800595
	10	3387	-0.00168567	0.0169916	0.012	0.800595
	13	1576	0.00224518	0.0213138	0.012	0.800595
	15	224	-0.00054397	0.00523261	0.012	0.800595
	15	686	-0.0006649	0.00665709	0.012	0.800595
	15	828	0.00157258	0.0150367	0.012	0.800595
	15	1490	-0.00057433	0.00535904	0.012	0.800595
	15	1561	0.00099177	0.0105862	0.012	0.800595
	15	1607	-0.0016172	0.0152611	0.012	0.800595
	15	2098	0.00028675	0.003511	0.012	0.800595
	15	2646	-0.00175256	0.017168	0.012	0.800595
	15	3127	-0.00035323	0.00363748	0.012	0.800595
	15	3351	-0.00117201	0.0110398	0.012	0.800595
	17	881	-0.00215998	0.0208638	0.012	0.800595
	17	1833	-0.0016202	0.0157649	0.012	0.800595
	17	2410	-0.00097739	0.00924501	0.012	0.800595
	18	275	-0.00076324	0.00714832	0.012	0.800595
	18	338	0.0009121	0.0100657	0.012	0.800595
	18	412	-0.00029012	0.00269432	0.012	0.800595
	18	1046	-0.00059447	0.00579972	0.012	0.800595
	18	2579	0.00021651	0.00207163	0.012	0.800595
	18	2967	-0.00090754	0.00912006	0.012	0.800595
	19	151	0.00099539	0.00975051	0.012	0.800595
	19	253	0.00038874	0.00369556	0.012	0.800595
	19	277	0.0010656	0.00974392	0.012	0.800595
	19	919	0.00054686	0.00505713	0.012	0.800595
	19	1546	-0.00038286	0.00352882	0.012	0.800595
	19	1704	0.00069322	0.006643	0.012	0.800595
	19	2498	-0.00104164	0.00996427	0.012	0.800595
	19	2549	-0.00143115	0.013989	0.012	0.800595
	2	137	-0.00023084	0.00225312	0.011	0.418316
	2	286	0.00056875	0.00692206	0.011	0.418316
	2	825	-0.00126861	0.0131468	0.011	0.418316
	2	920	0.00023675	0.00233029	0.011	0.418316
	2	986	-0.00126444	0.0122075	0.011	0.418316
	2	1418	0.00088038	0.00983918	0.011	0.418316
	2	1422	-0.00110804	0.0129345	0.011	0.418316
	2	1451	0.00060108	0.00584131	0.011	0.418316
	2	1844	-0.00099341	0.0126353	0.011	0.418316
	2	2058	0.00047362	0.00468622	0.011	0.418316
	2	2062	0.00160146	0.0158032	0.011	0.418316
	2	2187	-0.0010579	0.0104003	0.011	0.418316
	2	2828	-0.00190031	0.0189002	0.011	0.418316
	2	3095	0.00211412	0.0207504	0.011	0.418316
	2	3157	0.00141479	0.0140897	0.011	0.418316
	9	2762	0.00068272	0.00656002	0.011	0.418316
	10	79	0.00092383	0.00944538	0.011	0.418316
	10	185	0.00019576	0.0020775	0.011	0.418316
	10	389	-0.00066545	0.00695935	0.011	0.418316
	10	419	0.00031123	0.00300092	0.011	0.418316
	10	497	-0.00016761	0.0016618	0.011	0.418316
	10	613	0.00020419	0.00202721	0.011	0.418316
	10	666	-0.00123246	0.0125437	0.011	0.418316
	10	670	0.00047872	0.00465971	0.011	0.418316
	10	745	0.00064127	0.00623188	0.011	0.418316
	10	870	-0.00043569	0.00416196	0.011	0.418316
	10	908	-0.0004675	0.00478768	0.011	0.418316
	10	1156	0.00048722	0.0054605	0.011	0.418316
	10	1258	0.00094603	0.0101125	0.011	0.418316
	10	1272	0.00055168	0.00547739	0.011	0.418316
	10	1285	0.00074999	0.00740075	0.011	0.418316
	10	1324	-0.00062585	0.00635974	0.011	0.418316
	10	1344	0.00097878	0.0110753	0.011	0.418316
	10	1469	0.00165718	0.0177035	0.011	0.418316
	10	1855	0.00034071	0.00340802	0.011	0.418316
	10	1972	-0.00125706	0.0134557	0.011	0.418316
	10	2223	-0.00061513	0.00634143	0.011	0.418316
	10	2238	-0.0010074	0.0109277	0.011	0.418316
	10	2377	-0.00101253	0.00984676	0.011	0.418316
	10	2507	-0.00052939	0.00523367	0.011	0.418316
	10	2760	0.00076862	0.00874103	0.011	0.418316
	10	2821	0.00072582	0.00757118	0.011	0.418316
	10	2924	0.00092025	0.00946094	0.011	0.418316
	15	795	-0.00176343	0.01826	0.011	0.418316
	15	907	-0.00025752	0.00247061	0.011	0.418316
	15	1036	-0.00117947	0.0114804	0.011	0.418316
	15	1172	-0.00063942	0.00614081	0.011	0.418316
	15	1264	-0.00054501	0.00588701	0.011	0.418316
	15	1326	-0.00058534	0.00585608	0.011	0.418316
	15	1575	0.00099561	0.00950693	0.011	0.418316
	15	1633	-0.00145672	0.0149432	0.011	0.418316
	15	1634	0.00132362	0.0129519	0.011	0.418316
	15	1875	-0.00115319	0.013427	0.011	0.418316
	15	3196	0.00119763	0.0124551	0.011	0.418316
	17	15	0.00071693	0.00706263	0.011	0.418316
	17	287	0.00074315	0.0071481	0.011	0.418316
	17	470	0.0021564	0.0210378	0.011	0.418316
	17	504	0.0022362	0.0217139	0.011	0.418316
	17	882	0.00051379	0.00493114	0.011	0.418316
	17	2681	-0.00104309	0.0101352	0.011	0.418316
	18	1277	0.00070102	0.00696702	0.011	0.418316
	18	1583	-0.00090575	0.00886614	0.011	0.418316
	18	1923	-0.00058824	0.00601505	0.011	0.418316
	18	2416	0.00084142	0.00876534	0.011	0.418316
	18	2762	0.00082331	0.00806345	0.011	0.418316
	18	3261	0.00154256	0.0155134	0.011	0.418316
	19	502	-0.00180192	0.0178268	0.011	0.418316
	19	882	0.00059356	0.00606531	0.011	0.418316
	19	888	-0.0011548	0.0116172	0.011	0.418316
	19	962	-0.00071555	0.0073524	0.011	0.418316
	19	1221	0.00067282	0.00655353	0.011	0.418316
	19	1326	-0.00072649	0.00701903	0.011	0.418316
	19	1457	0.00050903	0.00496112	0.011	0.418316
	19	1488	0.00093991	0.00921012	0.011	0.418316
	19	1550	-0.00062367	0.00661373	0.011	0.418316
	19	1671	0.00063179	0.00618957	0.011	0.418316
	19	1672	0.00137184	0.0137763	0.011	0.418316
	19	2009	0.00029323	0.00355838	0.011	0.418316
	19	2091	-0.00125895	0.0125761	0.011	0.418316
	19	2275	0.00067038	0.00678069	0.011	0.418316
	19	2739	-0.00069946	0.00729223	0.011	0.418316
	19	3116	0.00131605	0.0144563	0.011	0.418316
	2	487	0.00061796	0.00679795	0.01	0
	2	538	0.00138615	0.0149047	0.01	0
	2	564	-0.00059146	0.00621373	0.01	0
	2	722	-0.00063141	0.00734515	0.01	0
	2	1060	-0.00058297	0.00683765	0.01	0
	2	1185	-0.00085516	0.0135904	0.01	0
	2	1469	0.00191235	0.0202447	0.01	0
	2	1570	0.00030487	0.00319536	0.01	0
	2	1682	-0.0018629	0.0190972	0.01	0
	2	1976	0.00023983	0.00258537	0.01	0
	2	2003	0.00095291	0.00957187	0.01	0
	2	2049	-2.46e-06	0.00252915	0.01	0
	2	2180	0.00039423	0.00422783	0.01	0
	2	2302	-0.00115187	0.0126904	0.01	0
	2	2328	-0.00028331	0.00339552	0.01	0
	2	2498	0.00071596	0.00814067	0.01	0
	2	2871	0.00093915	0.0102225	0.01	0
	2	3193	0.00041905	0.00468354	0.01	0
	2	3317	0.00137373	0.0167059	0.01	0
	6	1549	-0.00242765	0.0245362	0.01	0
	10	55	0.00036253	0.00426307	0.01	0
	10	81	0.00106232	0.0132628	0.01	0
	10	140	0.00041291	0.00415207	0.01	0
	10	160	0.00042422	0.00650078	0.01	0
	10	183	-0.00033574	0.00344829	0.01	0
	10	711	0.00063403	0.00767361	0.01	0
	10	1073	-0.00116887	0.0119917	0.01	0
	10	1082	0.00076176	0.0079067	0.01	0
	10	1116	0.00067271	0.00755293	0.01	0
	10	1159	-0.00064768	0.00680513	0.01	0
	10	1228	-0.00062607	0.00752387	0.01	0
	10	1376	-0.00101296	0.0105205	0.01	0
	10	1422	-0.00111348	0.012912	0.01	0
	10	1478	-0.00066465	0.00748909	0.01	0
	10	1525	-0.00142362	0.0152954	0.01	0
	10	1635	0.00057575	0.00627689	0.01	0
	10	1802	0.00020485	0.00210311	0.01	0
	10	2103	-0.00049118	0.0063279	0.01	0
	10	2157	0.00066443	0.00686923	0.01	0
	10	2390	-0.00066158	0.00685996	0.01	0
	10	2501	-0.00065917	0.00672514	0.01	0
	10	2620	0.00024543	0.00276731	0.01	0
	10	2919	0.00024709	0.00249698	0.01	0
	10	2977	0.00058552	0.00620095	0.01	0
	10	3120	-0.00058876	0.00735579	0.01	0
	10	3227	-0.00049453	0.00501224	0.01	0
	10	3278	-0.0016156	0.0175826	0.01	0
	10	3292	0.00064063	0.00650455	0.01	0
	10	3367	0.00046918	0.00642072	0.01	0
	13	1748	-0.00045412	0.00503206	0.01	0
	15	81	0.00163475	0.0183119	0.01	0
	15	708	-0.00026518	0.00270231	0.01	0
	15	805	0.00078849	0.00805134	0.01	0
	15	961	-0.00095373	0.0100282	0.01	0
	15	1285	0.00075844	0.00796128	0.01	0
	15	1297	0.00063488	0.0066253	0.01	0
	15	1455	0.00140607	0.0145706	0.01	0
	15	1672	0.0004862	0.00542594	0.01	0
	15	1919	0.00027699	0.00282274	0.01	0
	15	2712	-0.00072135	0.00733767	0.01	0
	15	2760	0.00129657	0.0140453	0.01	0
	15	3022	-0.00047833	0.00528338	0.01	0
	15	3116	0.00118777	0.0141799	0.01	0
	17	318	0.0003853	0.00397096	0.01	0
	17	495	-0.00075947	0.00769963	0.01	0
	17	834	0.00044405	0.00522898	0.01	0
	17	1150	-0.00198455	0.020997	0.01	0
	17	1463	0.00065904	0.00761107	0.01	0
	17	1719	0.00059055	0.00591587	0.01	0
	17	1941	0.00194162	0.0201028	0.01	0
	17	1955	0.00085613	0.00941715	0.01	0
	17	2100	0.00047556	0.00483102	0.01	0
	18	27	-0.00031049	0.00311325	0.01	0
	18	179	-0.00055878	0.00559816	0.01	0
	18	339	-0.00056154	0.00584181	0.01	0
	18	1053	0.000856	0.00903343	0.01	0
	18	1272	-0.00074643	0.00827668	0.01	0
	18	2632	0.00058705	0.00604918	0.01	0
	18	2652	-0.00086209	0.00889554	0.01	0
	18	2855	-0.0002407	0.00243323	0.01	0
	19	193	-0.00031399	0.003381	0.01	0
	19	295	-0.00076323	0.00824669	0.01	0
	19	693	0.00088362	0.00947014	0.01	0
	19	937	-0.00040473	0.00457677	0.01	0
	19	1148	0.00128118	0.0133167	0.01	0
	19	1182	0.00032578	0.0033171	0.01	0
	19	1474	-0.00082806	0.0085378	0.01	0
	19	1600	0.00030404	0.00304673	0.01	0
	19	1624	-0.00096883	0.0119809	0.01	0
	19	1789	0.00035283	0.00352443	0.01	0
	19	1948	-0.00048844	0.00515688	0.01	0
	19	2371	-0.00032658	0.00329933	0.01	0
	19	2825	0.00033659	0.00358035	0.01	0
	19	2909	0.00071768	0.00882527	0.01	0
	19	3114	-0.00048534	0.00487068	0.01	0
	19	3247	-0.00053782	0.00547451	0.01	0
	2	30	-0.00094322	0.0104919	0.009	-0.46196
	2	569	0.00098071	0.0111628	0.009	-0.46196
	2	755	0.00040113	0.00869759	0.009	-0.46196
	2	768	-0.00054568	0.00665822	0.009	-0.46196
	2	1026	0.00086127	0.00953253	0.009	-0.46196
	2	1133	-0.00107983	0.0121581	0.009	-0.46196
	2	1369	-0.00116817	0.0150263	0.009	-0.46196
	2	1597	-0.00055309	0.00599437	0.009	-0.46196
	2	1628	0.00116514	0.013454	0.009	-0.46196
	2	1694	-0.00036475	0.0039501	0.009	-0.46196
	2	1702	-0.00139173	0.0166112	0.009	-0.46196
	2	1733	-0.00076945	0.00964648	0.009	-0.46196
	2	1816	-0.00091895	0.0106858	0.009	-0.46196
	2	1850	0.00062295	0.00738649	0.009	-0.46196
	2	2441	0.00025918	0.00279445	0.009	-0.46196
	2	2488	-0.00040933	0.00437456	0.009	-0.46196
	2	2549	0.0008646	0.010766	0.009	-0.46196
	2	2681	0.00094608	0.010803	0.009	-0.46196
	2	2686	0.00059909	0.00671969	0.009	-0.46196
	2	2965	-0.0004665	0.00533454	0.009	-0.46196
	2	2979	0.00019072	0.00212354	0.009	-0.46196
	2	3021	0.00087683	0.00984866	0.009	-0.46196
	2	3144	0.00118716	0.0128401	0.009	-0.46196
	10	291	-0.00011671	0.00637218	0.009	-0.46196
	10	520	-0.0005039	0.0059223	0.009	-0.46196
	10	536	0.00031709	0.00341949	0.009	-0.46196
	10	576	0.00020841	0.00238522	0.009	-0.46196
	10	599	-0.00039023	0.00603655	0.009	-0.46196
	10	610	0.00046674	0.00694569	0.009	-0.46196
	10	1042	-0.00060601	0.00726315	0.009	-0.46196
	10	1230	0.00016001	0.00175672	0.009	-0.46196
	10	1254	-0.00033864	0.00379248	0.009	-0.46196
	10	1335	-0.00092353	0.0100202	0.009	-0.46196
	10	1345	0.00058639	0.00659678	0.009	-0.46196
	10	1369	0.00071396	0.00879792	0.009	-0.46196
	10	1414	-0.00054553	0.00781794	0.009	-0.46196
	10	1462	0.00057349	0.00609012	0.009	-0.46196
	10	1603	0.00026173	0.00281895	0.009	-0.46196
	10	1970	0.00050697	0.00568619	0.009	-0.46196
	10	2100	0.00050876	0.00608328	0.009	-0.46196
	10	2154	-0.00109064	0.0123881	0.009	-0.46196
	10	2237	-0.00021111	0.00966351	0.009	-0.46196
	10	2244	-0.00037113	0.00428418	0.009	-0.46196
	10	2440	-0.00033836	0.0041044	0.009	-0.46196
	10	2794	-0.00099954	0.0108839	0.009	-0.46196
	10	2855	0.00049858	0.00551946	0.009	-0.46196
	10	2996	0.00067454	0.00788932	0.009	-0.46196
	10	3122	0.00071916	0.00927999	0.009	-0.46196
	10	3144	-0.00093505	0.0102648	0.009	-0.46196
	15	179	0.00060655	0.00670202	0.009	-0.46196
	15	295	-0.00068	0.00790517	0.009	-0.46196
	15	681	0.0003587	0.0039331	0.009	-0.46196
	15	909	-0.00071749	0.00838704	0.009	-0.46196
	15	939	0.00044999	0.00480795	0.009	-0.46196
	15	1291	-0.00055276	0.00596881	0.009	-0.46196
	15	1292	0.00127398	0.0143421	0.009	-0.46196
	15	1397	0.00074312	0.00829013	0.009	-0.46196
	15	1674	-0.00086163	0.0103393	0.009	-0.46196
	15	2055	-0.00084539	0.011017	0.009	-0.46196
	15	2271	-0.00122995	0.0138653	0.009	-0.46196
	15	2740	0.00121716	0.0141566	0.009	-0.46196
	15	3070	-0.00040968	0.00580856	0.009	-0.46196
	15	3294	-0.00061555	0.00652526	0.009	-0.46196
	17	55	0.00051902	0.00568598	0.009	-0.46196
	17	102	-0.0012311	0.0145553	0.009	-0.46196
	17	535	-0.00022835	0.00242193	0.009	-0.46196
	17	823	0.00090998	0.0114491	0.009	-0.46196
	17	1220	0.00053496	0.00566211	0.009	-0.46196
	17	1285	0.00103191	0.0109204	0.009	-0.46196
	17	2013	0.00096038	0.0112727	0.009	-0.46196
	17	2546	-0.00070096	0.00739965	0.009	-0.46196
	17	3324	0.00048187	0.0053522	0.009	-0.46196
	18	140	-0.00012511	0.0013983	0.009	-0.46196
	18	565	0.00132741	0.0143328	0.009	-0.46196
	18	934	-0.00120274	0.013275	0.009	-0.46196
	18	2546	0.00125064	0.0142445	0.009	-0.46196
	19	69	0.00046736	0.00511184	0.009	-0.46196
	19	387	-0.00039443	0.004193	0.009	-0.46196
	19	769	0.00103635	0.0127282	0.009	-0.46196
	19	846	-0.00055662	0.0059299	0.009	-0.46196
	19	1120	0.00057647	0.00671728	0.009	-0.46196
	19	1188	0.00161295	0.0173334	0.009	-0.46196
	19	1458	-0.00068851	0.00811653	0.009	-0.46196
	19	1945	-0.00029073	0.00327112	0.009	-0.46196
	19	1956	0.00037672	0.0041142	0.009	-0.46196
	19	2062	-0.00065837	0.00746763	0.009	-0.46196
	19	2305	-0.00081316	0.00877049	0.009	-0.46196
	19	3233	-0.00048688	0.00517906	0.009	-0.46196
	21	474	-0.00218577	0.0233937	0.009	-0.46196
	2	25	0.00057752	0.00649114	0.008	-0.977865
	2	96	0.00038828	0.00462286	0.008	-0.977865
	2	340	-0.00053871	0.00628521	0.008	-0.977865
	2	387	-0.00032036	0.00365437	0.008	-0.977865
	2	391	0.00059689	0.00746143	0.008	-0.977865
	2	484	0.00052868	0.00689053	0.008	-0.977865
	2	497	-0.00015299	0.0017146	0.008	-0.977865
	2	744	0.00030268	0.00340788	0.008	-0.977865
	2	1078	0.00048976	0.00571548	0.008	-0.977865
	2	1172	0.00019607	0.0025361	0.008	-0.977865
	2	1202	-0.00048742	0.00816735	0.008	-0.977865
	2	1244	-0.00025875	0.0031597	0.008	-0.977865
	2	1397	-0.00059577	0.00713969	0.008	-0.977865
	2	1632	0.00049386	0.00556074	0.008	-0.977865
	2	1726	-0.00031426	0.0041114	0.008	-0.977865
	2	1791	-0.00058646	0.0077725	0.008	-0.977865
	2	1841	-0.0006239	0.0078468	0.008	-0.977865
	2	1903	0.00080737	0.010038	0.008	-0.977865
	2	1941	-0.00093364	0.0111876	0.008	-0.977865
	2	1951	-0.00023286	0.00260025	0.008	-0.977865
	2	2452	0.00041245	0.00482204	0.008	-0.977865
	2	2479	-0.00111916	0.0130443	0.008	-0.977865
	2	2811	0.00039175	0.00454076	0.008	-0.977865
	2	2986	-0.00145967	0.0166593	0.008	-0.977865
	2	3127	0.00033253	0.00371692	0.008	-0.977865
	2	3194	0.000866	0.00998239	0.008	-0.977865
	2	3308	-0.00075012	0.00913003	0.008	-0.977865
	6	1075	0.0005651	0.00637786	0.008	-0.977865
	9	902	0.00088267	0.0100653	0.008	-0.977865
	10	18	0.00038333	0.00579202	0.008	-0.977865
	10	289	0.00059491	0.00853551	0.008	-0.977865
	10	392	0.00016523	0.00349944	0.008	-0.977865
	10	452	0.00093593	0.0123563	0.008	-0.977865
	10	456	0.00050185	0.00575891	0.008	-0.977865
	10	503	0.00038464	0.00445362	0.008	-0.977865
	10	563	0.00021645	0.00272197	0.008	-0.977865
	10	674	0.00029881	0.00361692	0.008	-0.977865
	10	743	-0.00061599	0.00721908	0.008	-0.977865
	10	744	-0.00013189	0.00157225	0.008	-0.977865
	10	805	-0.00047789	0.00635561	0.008	-0.977865
	10	903	0.00071516	0.00895404	0.008	-0.977865
	10	964	-0.00019632	0.00227318	0.008	-0.977865
	10	1346	0.00037785	0.00467165	0.008	-0.977865
	10	1365	-0.00074476	0.0097856	0.008	-0.977865
	10	1370	0.00120301	0.0148099	0.008	-0.977865
	10	1375	-0.00091721	0.0106275	0.008	-0.977865
	10	1470	0.00018035	0.00988029	0.008	-0.977865
	10	1611	-0.00084656	0.0125311	0.008	-0.977865
	10	1726	0.00036676	0.00457756	0.008	-0.977865
	10	1775	-0.00027826	0.003631	0.008	-0.977865
	10	1797	-0.00044058	0.00509637	0.008	-0.977865
	10	1880	-0.00021558	0.00389332	0.008	-0.977865
	10	1881	0.00055183	0.00624859	0.008	-0.977865
	10	1911	-0.00028429	0.00410042	0.008	-0.977865
	10	1919	-0.00018462	0.00241404	0.008	-0.977865
	10	1949	0.000217	0.00250915	0.008	-0.977865
	10	2178	0.00068414	0.00910949	0.008	-0.977865
	10	2379	-0.0003844	0.00504954	0.008	-0.977865
	10	2412	-4.164e-05	0.0116706	0.008	-0.977865
	10	2476	-0.0005303	0.00642503	0.008	-0.977865
	10	2516	9.508e-05	0.00109334	0.008	-0.977865
	10	2571	-7.448e-05	0.0008442	0.008	-0.977865
	10	2730	0.00040949	0.0061543	0.008	-0.977865
	10	2781	8.228e-05	0.00099452	0.008	-0.977865
	10	2873	0.00046125	0.00581289	0.008	-0.977865
	10	3013	0.00053101	0.00639387	0.008	-0.977865
	10	3171	-0.00064463	0.0093406	0.008	-0.977865
	10	3194	-0.00071797	0.00882871	0.008	-0.977865
	10	3301	0.00087817	0.0114412	0.008	-0.977865
	15	491	0.00078347	0.0120085	0.008	-0.977865
	15	735	-0.00024123	0.0030536	0.008	-0.977865
	15	772	0.00036698	0.00644378	0.008	-0.977865
	15	892	0.00039784	0.00444834	0.008	-0.977865
	15	983	0.000221	0.00255068	0.008	-0.977865
	15	1820	0.00043478	0.00490515	0.008	-0.977865
	15	1900	-0.0007648	0.0102591	0.008	-0.977865
	15	2154	-0.00107036	0.0133478	0.008	-0.977865
	15	2622	0.00049581	0.00596859	0.008	-0.977865
	15	3020	-0.0007439	0.00905846	0.008	-0.977865
	17	468	-0.001048	0.0125872	0.008	-0.977865
	17	1422	0.00106729	0.0128041	0.008	-0.977865
	17	1498	-0.00052366	0.0061508	0.008	-0.977865
	17	1583	0.0002738	0.00309419	0.008	-0.977865
	17	1893	-0.00147054	0.0169449	0.008	-0.977865
	17	1979	-0.00061941	0.00702447	0.008	-0.977865
	17	2650	-0.00055264	0.00706049	0.008	-0.977865
	17	2674	0.00058466	0.00711279	0.008	-0.977865
	17	2680	0.0008768	0.0114853	0.008	-0.977865
	17	2726	-0.00075866	0.00868791	0.008	-0.977865
	17	2739	-0.00056935	0.00650357	0.008	-0.977865
	17	2783	0.00141754	0.0161496	0.008	-0.977865
	17	3106	0.00157268	0.0186557	0.008	-0.977865
	17	3167	-0.00027598	0.00312581	0.008	-0.977865
	18	177	0.00101238	0.0113736	0.008	-0.977865
	18	452	-0.00107486	0.0125685	0.008	-0.977865
	18	666	0.00104483	0.0124105	0.008	-0.977865
	18	1200	-0.00038627	0.00437414	0.008	-0.977865
	18	1271	0.00062649	0.010749	0.008	-0.977865
	18	1708	0.00074395	0.0085438	0.008	-0.977865
	18	1715	-0.00066597	0.00862642	0.008	-0.977865
	18	1759	-0.00100242	0.0115696	0.008	-0.977865
	18	2069	-0.00013968	0.00167862	0.008	-0.977865
	18	2340	-0.0003951	0.00463062	0.008	-0.977865
	18	2771	-0.00100975	0.0132698	0.008	-0.977865
	18	3081	-0.0008294	0.00971741	0.008	-0.977865
	18	3266	0.00034392	0.00392297	0.008	-0.977865
	18	3319	-0.00146245	0.0177522	0.008	-0.977865
	19	113	0.00075319	0.0103342	0.008	-0.977865
	19	115	-0.00040734	0.0048042	0.008	-0.977865
	19	461	-0.00055732	0.00648828	0.008	-0.977865
	19	822	-0.00095698	0.0119262	0.008	-0.977865
	19	930	0.00030853	0.00345501	0.008	-0.977865
	19	1055	0.0005622	0.00761597	0.008	-0.977865
	19	1106	0.000973	0.011288	0.008	-0.977865
	19	1126	-0.00035562	0.00430985	0.008	-0.977865
	19	1292	0.000966	0.01239	0.008	-0.977865
	19	1505	0.00056302	0.00636045	0.008	-0.977865
	19	2063	-0.00067878	0.00807496	0.008	-0.977865
	19	2092	0.00043134	0.00493992	0.008	-0.977865
	19	2258	-0.00098109	0.0111954	0.008	-0.977865
	19	2537	-0.00072668	0.00819395	0.008	-0.977865
	19	2657	0.00020997	0.00270105	0.008	-0.977865
	19	2683	-0.00095608	0.0108137	0.008	-0.977865
	19	2836	-0.00027858	0.00321703	0.008	-0.977865
	19	2908	-0.00095258	0.0116601	0.008	-0.977865
	19	3070	-0.00054437	0.00613876	0.008	-0.977865
	19	3265	-0.00131903	0.0160074	0.008	-0.977865
	2	13	-0.00066377	0.0101294	0.007	-1.56216
	2	31	0.000572	0.00795752	0.007	-1.56216
	2	44	0.00098486	0.0128763	0.007	-1.56216
	2	47	-0.0005272	0.00656518	0.007	-1.56216
	2	229	-7.558e-05	0.00111719	0.007	-1.56216
	2	470	-0.00095677	0.0134796	0.007	-1.56216
	2	769	-0.00091811	0.0129587	0.007	-1.56216
	2	906	-0.00073112	0.010566	0.007	-1.56216
	2	1149	0.00050248	0.00664008	0.007	-1.56216
	2	1271	0.00023833	0.00877346	0.007	-1.56216
	2	1284	0.00069532	0.00869847	0.007	-1.56216
	2	1340	0.00028404	0.00455434	0.007	-1.56216
	2	1577	-0.00027298	0.00357979	0.007	-1.56216
	2	1802	-0.00012627	0.00224492	0.007	-1.56216
	2	1848	-0.00019352	0.00235389	0.007	-1.56216
	2	1906	-0.00030165	0.00370651	0.007	-1.56216
	2	2072	0.00032061	0.00456708	0.007	-1.56216
	2	2090	0.00051423	0.00752006	0.007	-1.56216
	2	2143	0.00075544	0.0108651	0.007	-1.56216
	2	2196	0.00084672	0.013046	0.007	-1.56216
	2	2355	0.00053726	0.00661927	0.007	-1.56216
	2	2569	-0.00077582	0.0093689	0.007	-1.56216
	2	2585	-0.0006137	0.0106972	0.007	-1.56216
	2	2748	0.00036756	0.00475077	0.007	-1.56216
	2	2783	0.00074006	0.00942022	0.007	-1.56216
	2	2824	0.0002248	0.00343988	0.007	-1.56216
	2	2931	0.00059626	0.00729685	0.007	-1.56216
	2	2938	0.00032693	0.00394577	0.007	-1.56216
	2	3008	-0.00032999	0.0041063	0.007	-1.56216
	2	3104	0.00043577	0.00530678	0.007	-1.56216
	2	3121	0.00036111	0.00448707	0.007	-1.56216
	2	3283	0.0003615	0.00494542	0.007	-1.56216
	8	2987	0.00035316	0.00421763	0.007	-1.56216
	9	2513	0.00061076	0.00732435	0.007	-1.56216
	10	253	-0.00022284	0.00285464	0.007	-1.56216
	10	343	-0.0003944	0.00561389	0.007	-1.56216
	10	387	0.00021682	0.00283876	0.007	-1.56216
	10	440	-0.00046702	0.00757195	0.007	-1.56216
	10	595	0.00054882	0.0102641	0.007	-1.56216
	10	606	-0.00080914	0.0116769	0.007	-1.56216
	10	737	0.00090073	0.0113875	0.007	-1.56216
	10	755	-0.00022893	0.00283311	0.007	-1.56216
	10	819	-0.00033872	0.0041245	0.007	-1.56216
	10	820	0.00064105	0.00800548	0.007	-1.56216
	10	824	-0.00029986	0.00362405	0.007	-1.56216
	10	872	-0.00054481	0.009499	0.007	-1.56216
	10	911	0.00048598	0.0109574	0.007	-1.56216
	10	930	-0.00050131	0.00629024	0.007	-1.56216
	10	949	-0.00024348	0.00437248	0.007	-1.56216
	10	950	-0.00029795	0.00413707	0.007	-1.56216
	10	970	0.00011052	0.00135056	0.007	-1.56216
	10	1052	-0.00034422	0.00455572	0.007	-1.56216
	10	1061	-0.00027914	0.00608723	0.007	-1.56216
	10	1076	9.435e-05	0.0021107	0.007	-1.56216
	10	1193	0.00062402	0.00787993	0.007	-1.56216
	10	1246	0.00063641	0.00879454	0.007	-1.56216
	10	1303	-0.00072082	0.0122854	0.007	-1.56216
	10	1320	-0.00046382	0.00572193	0.007	-1.56216
	10	1347	0.00035692	0.00586173	0.007	-1.56216
	10	1438	0.00047582	0.00842311	0.007	-1.56216
	10	1511	-0.00053941	0.00912346	0.007	-1.56216
	10	1528	-0.00051811	0.00747337	0.007	-1.56216
	10	1557	-0.00039779	0.00577907	0.007	-1.56216
	10	1606	-0.00046542	0.00700747	0.007	-1.56216
	10	1616	0.00053402	0.00664202	0.007	-1.56216
	10	1618	0.00033136	0.0045599	0.007	-1.56216
	10	1735	0.000396	0.00501698	0.007	-1.56216
	10	1792	-0.00017636	0.00232253	0.007	-1.56216
	10	1819	-0.00020913	0.00256735	0.007	-1.56216
	10	1927	-0.00037413	0.00463776	0.007	-1.56216
	10	1941	0.0004368	0.00715878	0.007	-1.56216
	10	2069	0.00045744	0.00716088	0.007	-1.56216
	10	2141	-0.00052754	0.00753805	0.007	-1.56216
	10	2143	-0.00092161	0.0124097	0.007	-1.56216
	10	2190	0.00029174	0.00350313	0.007	-1.56216
	10	2206	-0.00025238	0.00324561	0.007	-1.56216
	10	2219	-0.00040496	0.00503714	0.007	-1.56216
	10	2245	-0.00030128	0.00367394	0.007	-1.56216
	10	2272	0.00030042	0.00369484	0.007	-1.56216
	10	2306	-0.00044818	0.00817754	0.007	-1.56216
	10	2393	-5.64e-06	0.00251917	0.007	-1.56216
	10	2538	0.00078613	0.00950515	0.007	-1.56216
	10	2598	0.00031421	0.00394519	0.007	-1.56216
	10	2629	-0.00076464	0.0099664	0.007	-1.56216
	10	2681	-0.00040302	0.00577376	0.007	-1.56216
	10	2782	0.00050237	0.00626274	0.007	-1.56216
	10	2885	-0.00047428	0.00807262	0.007	-1.56216
	10	2985	-0.0006614	0.00814324	0.007	-1.56216
	10	2997	-0.0008026	0.00991122	0.007	-1.56216
	10	3065	0.0007227	0.0104595	0.007	-1.56216
	10	3092	-0.0005362	0.00679055	0.007	-1.56216
	10	3240	-0.00050301	0.0063815	0.007	-1.56216
	10	3271	-0.00122595	0.0156714	0.007	-1.56216
	10	3311	0.00029339	0.00442681	0.007	-1.56216
	10	3340	0.00060169	0.00801646	0.007	-1.56216
	13	2951	-0.00031075	0.00374631	0.007	-1.56216
	15	14	-0.00030135	0.0037742	0.007	-1.56216
	15	31	-0.00054373	0.00657595	0.007	-1.56216
	15	92	0.0003988	0.00497419	0.007	-1.56216
	15	291	-0.00092501	0.0115341	0.007	-1.56216
	15	455	0.00013356	0.00162879	0.007	-1.56216
	15	504	0.00092526	0.013072	0.007	-1.56216
	15	552	0.00056601	0.00683444	0.007	-1.56216
	15	626	-0.00057875	0.00815776	0.007	-1.56216
	15	964	-0.00049047	0.00605751	0.007	-1.56216
	15	976	-0.00039809	0.00501029	0.007	-1.56216
	15	1106	0.00090077	0.0109835	0.007	-1.56216
	15	1125	0.0009046	0.0119028	0.007	-1.56216
	15	1155	-0.00081951	0.0110093	0.007	-1.56216
	15	1243	0.00047275	0.00585023	0.007	-1.56216
	15	1591	0.00073509	0.010116	0.007	-1.56216
	15	1656	0.00033494	0.00461695	0.007	-1.56216
	15	1659	-0.00031826	0.00518684	0.007	-1.56216
	15	1806	-0.0002265	0.00289124	0.007	-1.56216
	15	1922	-0.00032575	0.00459638	0.007	-1.56216
	15	1943	-0.00012573	0.00226515	0.007	-1.56216
	15	2058	-0.00045326	0.0057673	0.007	-1.56216
	15	2129	-0.00062227	0.00775169	0.007	-1.56216
	15	2180	-0.00038838	0.00567599	0.007	-1.56216
	15	2434	0.00028112	0.00355111	0.007	-1.56216
	15	2716	-0.00028317	0.00410742	0.007	-1.56216
	15	2843	-0.00023324	0.00299323	0.007	-1.56216
	15	3023	0.00091287	0.0126936	0.007	-1.56216
	15	3237	-0.00045012	0.00591247	0.007	-1.56216
	15	3367	0.00061459	0.00773922	0.007	-1.56216
	17	250	-0.00027879	0.00336305	0.007	-1.56216
	17	302	0.00059048	0.00767958	0.007	-1.56216
	17	2187	0.00102731	0.0127874	0.007	-1.56216
	17	2561	-0.00022777	0.00281371	0.007	-1.56216
	18	31	0.0005727	0.00697287	0.007	-1.56216
	18	552	0.00070144	0.00879492	0.007	-1.56216
	18	606	0.00101747	0.0133475	0.007	-1.56216
	18	718	-0.00116597	0.014525	0.007	-1.56216
	18	1624	-0.00118777	0.0154059	0.007	-1.56216
	18	1639	0.00048964	0.00672291	0.007	-1.56216
	18	1717	-0.00028965	0.00373635	0.007	-1.56216
	18	1936	0.00091054	0.0121913	0.007	-1.56216
	18	2084	-0.00017974	0.00224362	0.007	-1.56216
	18	2143	0.00079893	0.0110253	0.007	-1.56216
	18	2255	-0.0004362	0.00524833	0.007	-1.56216
	18	2721	-0.00039924	0.00530414	0.007	-1.56216
	18	2841	-0.00054705	0.00738595	0.007	-1.56216
	19	213	0.00045297	0.00573511	0.007	-1.56216
	19	235	0.00088226	0.0138232	0.007	-1.56216
	19	259	0.00079497	0.010295	0.007	-1.56216
	19	327	0.00041171	0.00529319	0.007	-1.56216
	19	901	0.00024448	0.00302091	0.007	-1.56216
	19	1733	-0.00067457	0.00984859	0.007	-1.56216
	19	1855	-0.00022139	0.00274109	0.007	-1.56216
	19	1982	0.0005502	0.00730708	0.007	-1.56216
	19	2109	0.00028142	0.00387033	0.007	-1.56216
	19	2216	-0.00032911	0.00397963	0.007	-1.56216
	19	2450	-0.00048536	0.00594955	0.007	-1.56216
	19	2641	-0.00099872	0.0121411	0.007	-1.56216
	19	3010	0.00065321	0.00794721	0.007	-1.56216
	19	3222	0.00010584	0.00128334	0.007	-1.56216
	2	78	0.00018023	0.00234821	0.006	-2.236
	2	202	-0.00040612	0.00535591	0.006	-2.236
	2	235	-0.00075881	0.0132591	0.006	-2.236
	2	252	0.00028446	0.00382877	0.006	-2.236
	2	317	0.0001913	0.00258584	0.006	-2.236
	2	436	0.00011601	0.0015192	0.006	-2.236
	2	445	-8.561e-05	0.00118592	0.006	-2.236
	2	611	-0.00016729	0.00223893	0.006	-2.236
	2	648	-5.888e-05	0.00155994	0.006	-2.236
	2	712	-0.00011983	0.0022242	0.006	-2.236
	2	761	0.00037004	0.0050726	0.006	-2.236
	2	877	8.013e-05	0.00105423	0.006	-2.236
	2	949	-0.00060199	0.0117732	0.006	-2.236
	2	1434	-0.00060092	0.00820552	0.006	-2.236
	2	1525	0.00098492	0.0133248	0.006	-2.236
	2	1633	0.00054699	0.00742145	0.006	-2.236
	2	1728	-0.00059273	0.00907271	0.006	-2.236
	2	1731	-0.00040689	0.00631342	0.006	-2.236
	2	1768	0.00010302	0.00132777	0.006	-2.236
	2	1883	0.00019979	0.00262249	0.006	-2.236
	2	2009	-0.00040166	0.00564033	0.006	-2.236
	2	2335	-0.00054462	0.0077754	0.006	-2.236
	2	2392	0.00108372	0.0142845	0.006	-2.236
	2	2402	0.00079032	0.0104378	0.006	-2.236
	2	2418	0.0008679	0.0126034	0.006	-2.236
	2	2520	-0.00039466	0.00589133	0.006	-2.236
	2	2542	-0.00020656	0.00290831	0.006	-2.236
	2	2545	0.00068932	0.010405	0.006	-2.236
	2	2548	-0.00024185	0.00335237	0.006	-2.236
	2	2629	0.000765	0.0122687	0.006	-2.236
	2	2633	-0.00041957	0.00558118	0.006	-2.236
	2	2642	0.00029567	0.00397912	0.006	-2.236
	2	2725	0.00030026	0.00414822	0.006	-2.236
	2	2826	-0.00070108	0.0127217	0.006	-2.236
	2	2831	0.00023684	0.00323473	0.006	-2.236
	2	2863	-0.00035903	0.00499657	0.006	-2.236
	2	2942	-1.408e-05	0.00313686	0.006	-2.236
	2	3033	-8.46e-05	0.00112542	0.006	-2.236
	2	3280	0.0005063	0.00730809	0.006	-2.236
	2	3339	0.00016365	0.00223699	0.006	-2.236
	7	799	-0.00073235	0.00944413	0.006	-2.236
	10	19	-0.00017355	0.00386441	0.006	-2.236
	10	102	-0.00027917	0.00374545	0.006	-2.236
	10	166	-0.00023265	0.00345838	0.006	-2.236
	10	184	-0.00038435	0.0056565	0.006	-2.236
	10	214	-2.701e-05	0.00345044	0.006	-2.236
	10	460	3.13e-05	0.00400043	0.006	-2.236
	10	501	0.00016696	0.00262986	0.006	-2.236
	10	593	-4.63e-05	0.00380005	0.006	-2.236
	10	616	-9.27e-05	0.00348397	0.006	-2.236
	10	649	9.98e-05	0.00628103	0.006	-2.236
	10	660	-7.876e-05	0.00220516	0.006	-2.236
	10	725	-0.00016164	0.00229581	0.006	-2.236
	10	753	0.00044416	0.0070116	0.006	-2.236
	10	803	0.00038406	0.00588108	0.006	-2.236
	10	837	0.00062018	0.0105587	0.006	-2.236
	10	893	0.0001681	0.0021688	0.006	-2.236
	10	904	0.00044646	0.0065727	0.006	-2.236
	10	920	-0.00028068	0.00366695	0.006	-2.236
	10	1016	-0.00069558	0.0133901	0.006	-2.236
	10	1017	-0.00029434	0.00458886	0.006	-2.236
	10	1099	-0.00054277	0.00896717	0.006	-2.236
	10	1174	-9.999e-05	0.00145364	0.006	-2.236
	10	1185	-0.00077711	0.0113351	0.006	-2.236
	10	1284	-0.00036499	0.00582431	0.006	-2.236
	10	1308	-0.00015744	0.00205576	0.006	-2.236
	10	1314	0.00031802	0.00460659	0.006	-2.236
	10	1388	0.00023206	0.00319676	0.006	-2.236
	10	1446	-0.00020855	0.00326311	0.006	-2.236
	10	1481	0.00025319	0.00550868	0.006	-2.236
	10	1520	0.00067098	0.0103395	0.006	-2.236
	10	1666	0.0002578	0.00482569	0.006	-2.236
	10	1670	-0.00027575	0.00440934	0.006	-2.236
	10	1686	0.00051144	0.0068322	0.006	-2.236
	10	1722	0.00036205	0.00528542	0.006	-2.236
	10	1789	-0.00012672	0.00192565	0.006	-2.236
	10	1808	0.00060477	0.00945087	0.006	-2.236
	10	1832	-6.37e-05	0.00085	0.006	-2.236
	10	1873	0.00024882	0.0033545	0.006	-2.236
	10	1893	-0.00051473	0.00744143	0.006	-2.236
	10	1922	-9.935e-05	0.00174003	0.006	-2.236
	10	2032	0.00039618	0.0058465	0.006	-2.236
	10	2077	-0.00042476	0.00641639	0.006	-2.236
	10	2093	0.00016912	0.00270243	0.006	-2.236
	10	2148	0.00023849	0.00374814	0.006	-2.236
	10	2171	-0.00023804	0.00576655	0.006	-2.236
	10	2179	0.00017745	0.00263291	0.006	-2.236
	10	2198	-0.00019545	0.00384437	0.006	-2.236
	10	2207	0.00039427	0.00528614	0.006	-2.236
	10	2325	-0.00060644	0.00859547	0.006	-2.236
	10	2334	0.00017808	0.00245605	0.006	-2.236
	10	2398	0.00036126	0.00813118	0.006	-2.236
	10	2409	0.00067598	0.0092933	0.006	-2.236
	10	2421	-0.00026382	0.00445768	0.006	-2.236
	10	2439	0.00039567	0.00650137	0.006	-2.236
	10	2443	1.69e-05	0.00335907	0.006	-2.236
	10	2444	0.00045474	0.00799702	0.006	-2.236
	10	2497	-0.00026218	0.0050516	0.006	-2.236
	10	2514	0.0006571	0.0094362	0.006	-2.236
	10	2642	0.00029142	0.00376464	0.006	-2.236
	10	2686	-0.00047685	0.00681202	0.006	-2.236
	10	2725	-0.00021368	0.00280942	0.006	-2.236
	10	2740	0.00043831	0.00588412	0.006	-2.236
	10	2801	-0.00093975	0.012376	0.006	-2.236
	10	2802	0.00047471	0.00624115	0.006	-2.236
	10	2832	-8.523e-05	0.0011124	0.006	-2.236
	10	2932	0.00036049	0.00510412	0.006	-2.236
	10	2961	8.357e-05	0.00108299	0.006	-2.236
	10	3073	0.00033209	0.0048253	0.006	-2.236
	10	3086	-0.00019917	0.00365439	0.006	-2.236
	10	3183	0.00013127	0.00182864	0.006	-2.236
	10	3299	0.00030545	0.00485492	0.006	-2.236
	10	3317	-0.00028927	0.009725	0.006	-2.236
	10	3383	-0.00025716	0.00578426	0.006	-2.236
	15	65	0.00094986	0.0134554	0.006	-2.236
	15	78	0.0001469	0.00212429	0.006	-2.236
	15	102	-0.00067099	0.00897512	0.006	-2.236
	15	146	-0.00034437	0.00509557	0.006	-2.236
	15	190	-0.00072287	0.00991533	0.006	-2.236
	15	202	0.00038672	0.00504516	0.006	-2.236
	15	343	0.0003527	0.00523777	0.006	-2.236
	15	413	0.00054308	0.00727042	0.006	-2.236
	15	457	0.0003097	0.00427632	0.006	-2.236
	15	584	8.363e-05	0.00115796	0.006	-2.236
	15	608	-0.00042884	0.00676402	0.006	-2.236
	15	655	0.00045596	0.00723559	0.006	-2.236
	15	690	-0.0003436	0.00444624	0.006	-2.236
	15	717	-6.678e-05	0.00491109	0.006	-2.236
	15	737	0.00017658	0.00745031	0.006	-2.236
	15	833	0.00040519	0.00571225	0.006	-2.236
	15	929	-0.00088201	0.011456	0.006	-2.236
	15	956	-0.0001985	0.00290373	0.006	-2.236
	15	986	0.00024068	0.00344981	0.006	-2.236
	15	1406	-0.00064406	0.00858318	0.006	-2.236
	15	1425	0.00083091	0.012099	0.006	-2.236
	15	1491	0.00016708	0.00222332	0.006	-2.236
	15	1527	0.00057356	0.00850205	0.006	-2.236
	15	1658	0.00031552	0.00419476	0.006	-2.236
	15	1902	-0.00057223	0.00820277	0.006	-2.236
	15	1908	-0.00029802	0.00462641	0.006	-2.236
	15	1991	0.00015152	0.00197913	0.006	-2.236
	15	2009	0.00041911	0.00630688	0.006	-2.236
	15	2349	0.00016119	0.00387533	0.006	-2.236
	15	2470	-0.00049963	0.00666481	0.006	-2.236
	15	2484	0.00055019	0.00720827	0.006	-2.236
	15	2519	0.00032737	0.00512579	0.006	-2.236
	15	2612	-0.00037349	0.00500283	0.006	-2.236
	15	2691	0.00074046	0.0100129	0.006	-2.236
	15	2761	-0.00035233	0.00456734	0.006	-2.236
	15	2813	0.00062787	0.00845951	0.006	-2.236
	15	2828	0.00081773	0.0108035	0.006	-2.236
	15	2909	0.00086643	0.0114528	0.006	-2.236
	15	2999	-0.00053089	0.006879	0.006	-2.236
	15	3085	0.00031808	0.00439852	0.006	-2.236
	15	3361	0.00021807	0.00304382	0.006	-2.236
	17	153	0.00022097	0.00295138	0.006	-2.236
	17	610	0.00051347	0.0079753	0.006	-2.236
	17	773	0.00039863	0.0064328	0.006	-2.236
	17	1245	0.00088458	0.0115502	0.006	-2.236
	17	1297	0.00027181	0.00358802	0.006	-2.236
	17	1305	0.00083299	0.011529	0.006	-2.236
	17	1318	-0.00060396	0.00796758	0.006	-2.236
	17	1754	0.00036972	0.00518939	0.006	-2.236
	17	1951	0.00034457	0.00489618	0.006	-2.236
	17	1970	0.00099588	0.0130996	0.006	-2.236
	17	2073	-0.00066144	0.0093084	0.006	-2.236
	17	2085	0.00025047	0.00342343	0.006	-2.236
	17	2549	-0.00077523	0.0114807	0.006	-2.236
	17	3049	-0.00097145	0.0138492	0.006	-2.236
	17	3127	-0.00049265	0.00756236	0.006	-2.236
	17	3336	0.00070894	0.00964798	0.006	-2.236
	18	102	0.0005277	0.0073991	0.006	-2.236
	18	883	0.00102822	0.0137479	0.006	-2.236
	18	1246	-0.00089522	0.0123276	0.006	-2.236
	18	1377	0.00020654	0.00293955	0.006	-2.236
	18	1478	0.00054599	0.00757016	0.006	-2.236
	18	1720	-0.00021254	0.00385147	0.006	-2.236
	18	1805	0.00020949	0.00273525	0.006	-2.236
	18	1954	-0.00025352	0.00406111	0.006	-2.236
	18	2031	-0.00091552	0.0118684	0.006	-2.236
	18	2606	0.00043992	0.00753168	0.006	-2.236
	18	2917	-0.00098483	0.0132438	0.006	-2.236
	18	3092	0.00067589	0.00960782	0.006	-2.236
	18	3278	0.00079268	0.0142326	0.006	-2.236
	18	3336	-0.00141459	0.0185106	0.006	-2.236
	19	109	0.0003989	0.00550965	0.006	-2.236
	19	190	-0.00052087	0.00704718	0.006	-2.236
	19	255	-0.00029483	0.00421264	0.006	-2.236
	19	338	-0.00051792	0.00811424	0.006	-2.236
	19	395	-0.00043766	0.00602227	0.006	-2.236
	19	422	-0.00035726	0.00592379	0.006	-2.236
	19	444	-0.00018157	0.00287624	0.006	-2.236
	19	572	0.00024976	0.00323791	0.006	-2.236
	19	720	-7.1e-05	0.00107303	0.006	-2.236
	19	795	-0.00111313	0.0163098	0.006	-2.236
	19	862	-0.00027783	0.00362476	0.006	-2.236
	19	908	0.00016654	0.0036027	0.006	-2.236
	19	911	-0.00064285	0.00932626	0.006	-2.236
	19	1141	-0.00035635	0.00478612	0.006	-2.236
	19	1290	0.00035593	0.0053276	0.006	-2.236
	19	1424	0.0002379	0.00316922	0.006	-2.236
	19	1552	-0.00015223	0.00202289	0.006	-2.236
	19	1579	-0.0003296	0.00440686	0.006	-2.236
	19	1595	-0.00037663	0.00551484	0.006	-2.236
	19	1695	-0.0002002	0.00267451	0.006	-2.236
	19	1724	0.00069896	0.009087	0.006	-2.236
	19	1744	-0.00027323	0.00360367	0.006	-2.236
	19	1833	-0.00060466	0.0083644	0.006	-2.236
	19	1924	-0.0002939	0.00386082	0.006	-2.236
	19	2016	0.00016588	0.00215864	0.006	-2.236
	19	2069	2.615e-05	0.00584089	0.006	-2.236
	19	2118	0.00084317	0.0121081	0.006	-2.236
	19	2219	0.00032573	0.00438032	0.006	-2.236
	19	2513	-0.00029417	0.00381054	0.006	-2.236
	19	2896	-0.0003038	0.0052369	0.006	-2.236
	19	3060	-0.00093515	0.0126974	0.006	-2.236
	19	3126	-0.00066725	0.00903932	0.006	-2.236
	19	3327	0.00047168	0.00617219	0.006	-2.236
	19	3384	0.00042884	0.00560736	0.006	-2.236
	1	2758	0.00045027	0.00636923	0.005	-3.03218
	2	92	-0.00026751	0.00384944	0.005	-3.03218
	2	121	0.0004369	0.00818125	0.005	-3.03218
	2	182	0.00041478	0.00599037	0.005	-3.03218
	2	320	0.00037617	0.0053282	0.005	-3.03218
	2	348	-0.00025434	0.00374943	0.005	-3.03218
	2	366	8.553e-05	0.00584382	0.005	-3.03218
	2	369	0.00014253	0.00335412	0.005	-3.03218
	2	413	-0.00031652	0.00448961	0.005	-3.03218
	2	475	-0.00020172	0.00304896	0.005	-3.03218
	2	549	0.00125235	0.0177467	0.005	-3.03218
	2	626	-0.00019147	0.0049053	0.005	-3.03218
	2	633	0.00043756	0.00624944	0.005	-3.03218
	2	649	-0.00043047	0.00639165	0.005	-3.03218
	2	764	-5.247e-05	0.00326321	0.005	-3.03218
	2	918	-0.00012717	0.00295015	0.005	-3.03218
	2	927	0.00031935	0.00495336	0.005	-3.03218
	2	977	-0.00029638	0.00442585	0.005	-3.03218
	2	992	-0.00010932	0.00170022	0.005	-3.03218
	2	1031	0.00015906	0.00571213	0.005	-3.03218
	2	1050	0.00021515	0.00520125	0.005	-3.03218
	2	1096	-0.00025995	0.00374461	0.005	-3.03218
	2	1105	0.00015418	0.00240872	0.005	-3.03218
	2	1165	0.00018579	0.00483359	0.005	-3.03218
	2	1212	0.00025179	0.00421473	0.005	-3.03218
	2	1264	0.00024383	0.00447681	0.005	-3.03218
	2	1328	0.00016095	0.00268081	0.005	-3.03218
	2	1483	-0.0001355	0.00200542	0.005	-3.03218
	2	1616	-0.00017041	0.00408558	0.005	-3.03218
	2	1631	-0.00023454	0.00432768	0.005	-3.03218
	2	1720	-0.00012749	0.0025159	0.005	-3.03218
	2	1754	-0.00028491	0.00447099	0.005	-3.03218
	2	1772	0.00041473	0.00793706	0.005	-3.03218
	2	1901	-0.0003041	0.00461926	0.005	-3.03218
	2	1921	0.00020625	0.00368918	0.005	-3.03218
	2	1962	-0.00048188	0.00765448	0.005	-3.03218
	2	1979	2.681e-05	0.00104363	0.005	-3.03218
	2	2005	0.00025937	0.0041201	0.005	-3.03218
	2	2056	-0.00034042	0.00571226	0.005	-3.03218
	2	2142	-0.00043049	0.00630943	0.005	-3.03218
	2	2262	-0.00015722	0.00253484	0.005	-3.03218
	2	2315	-0.00023037	0.00362136	0.005	-3.03218
	2	2494	0.00046356	0.00826498	0.005	-3.03218
	2	2596	-0.00025138	0.00377183	0.005	-3.03218
	2	2597	-0.00036049	0.0067599	0.005	-3.03218
	2	2682	-0.00043054	0.00688486	0.005	-3.03218
	2	2736	-0.00053499	0.00802545	0.005	-3.03218
	2	2817	0.00017685	0.0026708	0.005	-3.03218
	2	3049	0.00067835	0.0103444	0.005	-3.03218
	2	3052	0.00050637	0.0088524	0.005	-3.03218
	2	3168	-0.00059347	0.00877682	0.005	-3.03218
	2	3175	0.0002482	0.00486708	0.005	-3.03218
	2	3229	9.374e-05	0.00143129	0.005	-3.03218
	2	3244	0.00030505	0.00527108	0.005	-3.03218
	2	3298	0.0005212	0.00933995	0.005	-3.03218
	2	3311	-9.104e-05	0.00209545	0.005	-3.03218
	2	3331	-0.00017575	0.00249642	0.005	-3.03218
	2	3380	-0.00039427	0.0059183	0.005	-3.03218
	4	799	0.00056898	0.00811562	0.005	-3.03218
	6	599	0.00069995	0.0101666	0.005	-3.03218
	10	3	0.00010689	0.00185626	0.005	-3.03218
	10	62	7.069e-05	0.00101819	0.005	-3.03218
	10	64	0.00014541	0.00263435	0.005	-3.03218
	10	68	-7.257e-05	0.00496409	0.005	-3.03218
	10	75	-6.386e-05	0.00544425	0.005	-3.03218
	10	121	-0.0002108	0.00431847	0.005	-3.03218
	10	139	-7.271e-05	0.00540455	0.005	-3.03218
	10	154	-0.00017777	0.00264819	0.005	-3.03218
	10	196	9.576e-05	0.00233217	0.005	-3.03218
	10	204	9.066e-05	0.00128186	0.005	-3.03218
	10	242	-0.00022773	0.00399181	0.005	-3.03218
	10	258	0.00018216	0.00276587	0.005	-3.03218
	10	259	-4.227e-05	0.00224312	0.005	-3.03218
	10	273	-0.00038202	0.00712909	0.005	-3.03218
	10	307	-0.00011989	0.00207	0.005	-3.03218
	10	308	6.839e-05	0.00097349	0.005	-3.03218
	10	319	4.648e-05	0.00066696	0.005	-3.03218
	10	431	-0.0002603	0.00462385	0.005	-3.03218
	10	488	1.149e-05	0.00261277	0.005	-3.03218
	10	530	0.00013089	0.00190981	0.005	-3.03218
	10	551	0.00018728	0.00294609	0.005	-3.03218
	10	571	0.0003658	0.00535288	0.005	-3.03218
	10	619	0.0001755	0.00378978	0.005	-3.03218
	10	632	0.00024992	0.00366173	0.005	-3.03218
	10	654	-0.00011604	0.00165952	0.005	-3.03218
	10	695	0.00046243	0.00817988	0.005	-3.03218
	10	722	0.00021277	0.00341545	0.005	-3.03218
	10	751	-0.00019555	0.00312812	0.005	-3.03218
	10	762	-0.00047087	0.00833833	0.005	-3.03218
	10	765	0.00015719	0.00253142	0.005	-3.03218
	10	795	7.748e-05	0.00221728	0.005	-3.03218
	10	846	0.00019705	0.00415119	0.005	-3.03218
	10	932	0.00013191	0.0038637	0.005	-3.03218
	10	961	0.0003711	0.00689057	0.005	-3.03218
	10	1013	0.00027276	0.00395935	0.005	-3.03218
	10	1037	-0.00018535	0.00324093	0.005	-3.03218
	10	1051	-0.00022886	0.00406111	0.005	-3.03218
	10	1122	0.00016781	0.00261047	0.005	-3.03218
	10	1128	0.00014685	0.00225053	0.005	-3.03218
	10	1202	0.00068636	0.00997458	0.005	-3.03218
	10	1205	-0.00034555	0.00620894	0.005	-3.03218
	10	1374	0.00019252	0.00294929	0.005	-3.03218
	10	1408	-0.00024751	0.00418766	0.005	-3.03218
	10	1409	-0.00014768	0.00208569	0.005	-3.03218
	10	1439	-0.00017104	0.00319024	0.005	-3.03218
	10	1444	0.00036939	0.00526655	0.005	-3.03218
	10	1463	0.00039933	0.00584899	0.005	-3.03218
	10	1495	-0.00023951	0.00548302	0.005	-3.03218
	10	1555	-0.00037524	0.00542071	0.005	-3.03218
	10	1634	-0.0001198	0.00408861	0.005	-3.03218
	10	1739	-0.00054231	0.00786515	0.005	-3.03218
	10	1809	3.048e-05	0.00333016	0.005	-3.03218
	10	1892	-0.00037931	0.00740463	0.005	-3.03218
	10	1901	0.00018677	0.00271002	0.005	-3.03218
	10	1912	4.88e-05	0.00598971	0.005	-3.03218
	10	1913	0.00016727	0.00267992	0.005	-3.03218
	10	1947	-5.58e-06	0.0019387	0.005	-3.03218
	10	1979	-0.00057318	0.00886705	0.005	-3.03218
	10	1988	-6.276e-05	0.00558001	0.005	-3.03218
	10	1992	0.00014283	0.00224903	0.005	-3.03218
	10	1997	-0.00019338	0.00279639	0.005	-3.03218
	10	2031	0.00019908	0.00510417	0.005	-3.03218
	10	2037	0.00031522	0.0069027	0.005	-3.03218
	10	2040	0.00021137	0.00385592	0.005	-3.03218
	10	2055	-0.00035167	0.00622591	0.005	-3.03218
	10	2196	-0.00017973	0.00618483	0.005	-3.03218
	10	2220	0.00011587	0.00186123	0.005	-3.03218
	10	2349	-0.00035531	0.00588682	0.005	-3.03218
	10	2380	9.382e-05	0.00135094	0.005	-3.03218
	10	2392	-0.00036464	0.00588453	0.005	-3.03218
	10	2402	-0.00046531	0.0069459	0.005	-3.03218
	10	2447	0.0002478	0.00488026	0.005	-3.03218
	10	2448	-4.73e-05	0.00151824	0.005	-3.03218
	10	2450	0.00020333	0.00370819	0.005	-3.03218
	10	2494	4.497e-05	0.00649758	0.005	-3.03218
	10	2495	0.00024332	0.00458282	0.005	-3.03218
	10	2527	-0.00034642	0.00582268	0.005	-3.03218
	10	2588	0.00046789	0.00761261	0.005	-3.03218
	10	2597	0.00028215	0.0069729	0.005	-3.03218
	10	2605	-0.00023717	0.00478015	0.005	-3.03218
	10	2622	-0.00017485	0.00512519	0.005	-3.03218
	10	2710	0.00030924	0.00502769	0.005	-3.03218
	10	2715	0.00025496	0.00378641	0.005	-3.03218
	10	2776	-2.394e-05	0.00150643	0.005	-3.03218
	10	2809	0.00015118	0.00262558	0.005	-3.03218
	10	2871	0.00033455	0.00633743	0.005	-3.03218
	10	2937	-0.00031271	0.00447745	0.005	-3.03218
	10	3023	5.207e-05	0.00730865	0.005	-3.03218
	10	3028	9.614e-05	0.00220345	0.005	-3.03218
	10	3105	-3.587e-05	0.00407987	0.005	-3.03218
	10	3115	-0.00018817	0.00349524	0.005	-3.03218
	10	3139	-1.346e-05	0.0031753	0.005	-3.03218
	10	3149	7.467e-05	0.00330907	0.005	-3.03218
	10	3215	0.00033961	0.0059519	0.005	-3.03218
	10	3267	0.00046032	0.00983612	0.005	-3.03218
	10	3286	0.00023954	0.00352102	0.005	-3.03218
	10	3303	-8.76e-05	0.00288042	0.005	-3.03218
	10	3372	0.00016382	0.00253794	0.005	-3.03218
	13	2133	0.00089297	0.0128848	0.005	-3.03218
	15	61	-0.0001619	0.00269475	0.005	-3.03218
	15	95	0.00011195	0.00246136	0.005	-3.03218
	15	113	0.00020598	0.00482212	0.005	-3.03218
	15	144	-0.00025836	0.00474413	0.005	-3.03218
	15	310	-0.00013982	0.00219469	0.005	-3.03218
	15	361	0.00030289	0.00460578	0.005	-3.03218
	15	365	9.202e-05	0.00136411	0.005	-3.03218
	15	426	-0.00037761	0.0058321	0.005	-3.03218
	15	429	-0.0003026	0.0050805	0.005	-3.03218
	15	483	0.00024883	0.00472482	0.005	-3.03218
	15	586	0.00020812	0.00314113	0.005	-3.03218
	15	661	0.00034354	0.00496841	0.005	-3.03218
	15	693	0.00036404	0.00607857	0.005	-3.03218
	15	854	0.00064201	0.00942075	0.005	-3.03218
	15	955	-0.00018571	0.00342876	0.005	-3.03218
	15	969	-0.00046139	0.0075303	0.005	-3.03218
	15	982	-0.00030453	0.00459219	0.005	-3.03218
	15	1123	-0.00035049	0.00586908	0.005	-3.03218
	15	1182	0.00030553	0.00437061	0.005	-3.03218
	15	1185	0.00055088	0.0098529	0.005	-3.03218
	15	1207	0.00031146	0.00454454	0.005	-3.03218
	15	1218	-0.00023337	0.00411682	0.005	-3.03218
	15	1220	0.00029339	0.00420185	0.005	-3.03218
	15	1329	0.00048162	0.00737966	0.005	-3.03218
	15	1336	-8.12e-05	0.00115036	0.005	-3.03218
	15	1345	0.00013731	0.00194843	0.005	-3.03218
	15	1349	0.00016669	0.00291645	0.005	-3.03218
	15	1485	-0.00018167	0.00280817	0.005	-3.03218
	15	1494	0.00044999	0.00637245	0.005	-3.03218
	15	1511	-0.00052284	0.0109678	0.005	-3.03218
	15	1546	-0.00018059	0.00264282	0.005	-3.03218
	15	1712	-0.00032893	0.00473283	0.005	-3.03218
	15	1816	-3.946e-05	0.00263558	0.005	-3.03218
	15	1858	0.00052606	0.0104253	0.005	-3.03218
	15	1877	-0.00023426	0.00694561	0.005	-3.03218
	15	1887	0.00025293	0.00359289	0.005	-3.03218
	15	1980	-0.00046126	0.00741821	0.005	-3.03218
	15	2020	9.519e-05	0.00455267	0.005	-3.03218
	15	2063	-0.00061583	0.00932185	0.005	-3.03218
	15	2275	0.00034153	0.00500188	0.005	-3.03218
	15	2311	-0.00037505	0.00747821	0.005	-3.03218
	15	2403	0.00028073	0.00511778	0.005	-3.03218
	15	2425	-0.00063748	0.0104096	0.005	-3.03218
	15	2432	-0.00020389	0.00391832	0.005	-3.03218
	15	2513	5.436e-05	0.00246125	0.005	-3.03218
	15	2515	0.00052609	0.00813174	0.005	-3.03218
	15	2594	-0.00039533	0.00590518	0.005	-3.03218
	15	2623	0.00034411	0.00501534	0.005	-3.03218
	15	2648	-0.00024693	0.00493215	0.005	-3.03218
	15	2657	0.00031271	0.00507498	0.005	-3.03218
	15	2663	-0.00018763	0.00379022	0.005	-3.03218
	15	2704	-0.00035799	0.00624107	0.005	-3.03218
	15	2869	0.00032211	0.00633939	0.005	-3.03218
	15	3106	0.00057258	0.0111702	0.005	-3.03218
	15	3156	0.00026556	0.00402062	0.005	-3.03218
	15	3171	-0.00038233	0.00571086	0.005	-3.03218
	15	3241	-0.00017575	0.00251374	0.005	-3.03218
	15	3281	0.00012042	0.00201772	0.005	-3.03218
	15	3370	0.000486	0.00741802	0.005	-3.03218
	15	3381	0.00025401	0.00373106	0.005	-3.03218
	17	813	0.00029705	0.0042996	0.005	-3.03218
	17	1025	0.00023458	0.00344632	0.005	-3.03218
	17	1122	0.00014456	0.00223171	0.005	-3.03218
	17	1468	-0.00018513	0.00299479	0.005	-3.03218
	17	1807	-0.00051452	0.00789149	0.005	-3.03218
	17	2062	-0.00083686	0.0121839	0.005	-3.03218
	17	2201	0.00045633	0.00701958	0.005	-3.03218
	17	2244	-0.00023953	0.00340349	0.005	-3.03218
	17	2343	4.253e-05	0.00078521	0.005	-3.03218
	17	2606	-0.00053896	0.00788062	0.005	-3.03218
	17	2639	0.00021043	0.00301088	0.005	-3.03218
	17	2701	-0.00021111	0.00314822	0.005	-3.03218
	18	84	0.0004066	0.00600672	0.005	-3.03218
	18	86	0.00035504	0.00522924	0.005	-3.03218
	18	188	-0.00011802	0.00201394	0.005	-3.03218
	18	235	-0.00077884	0.0123001	0.005	-3.03218
	18	513	-0.00067059	0.00972257	0.005	-3.03218
	18	653	-3.658e-05	0.00066635	0.005	-3.03218
	18	665	-0.00042981	0.00636851	0.005	-3.03218
	18	939	-0.00013531	0.00191488	0.005	-3.03218
	18	1146	0.00010927	0.00162649	0.005	-3.03218
	18	1182	-0.00072677	0.011512	0.005	-3.03218
	18	1245	-0.00064619	0.00930966	0.005	-3.03218
	18	1300	-0.00014316	0.00209877	0.005	-3.03218
	18	1498	0.00021811	0.00335589	0.005	-3.03218
	18	1525	0.00078207	0.0121381	0.005	-3.03218
	18	1559	-0.00030364	0.00468616	0.005	-3.03218
	18	1569	-0.00019306	0.00324736	0.005	-3.03218
	18	1761	-0.00016113	0.00259386	0.005	-3.03218
	18	1799	-0.00028741	0.00421664	0.005	-3.03218
	18	2038	5.195e-05	0.00075415	0.005	-3.03218
	18	2251	-0.0001252	0.00310034	0.005	-3.03218
	18	2539	-0.00047285	0.00783446	0.005	-3.03218
	18	2672	-0.00055679	0.00814342	0.005	-3.03218
	18	2773	-0.00038872	0.00552905	0.005	-3.03218
	18	2808	-0.00030416	0.00433839	0.005	-3.03218
	18	2908	-0.00058767	0.00960027	0.005	-3.03218
	18	2927	0.00028531	0.00492319	0.005	-3.03218
	18	2945	-0.00044699	0.00634618	0.005	-3.03218
	18	3076	0.00069285	0.0109517	0.005	-3.03218
	18	3144	0.00048014	0.0072347	0.005	-3.03218
	18	3302	-0.00029135	0.00421291	0.005	-3.03218
	19	82	0.00014239	0.00221909	0.005	-3.03218
	19	122	0.00021787	0.00344281	0.005	-3.03218
[truncated: 72,515 more rows]

## Sheet: Table_S4c_Spearman_correlations
		1	2	3	4	5	6	7	8	9	10	11	12	13	14	15	16	17	18	19	20	21	22
		Latitude	Longitude	Altitude	AnnualMeanTemperature	MeanDiurnalRangeT	Isothermality	TemperatureSeasonality	MaxTWarmMonth	MinTColdMonth	T_AnnualRange	MeanTWetQ	MeanTDriQ	MeanTWarmQ	MeanTColdQ	AnnualPrecipitation	PwetM	PdriM	Pseasonality	PwetQ	PdriQ	PwarmQ	PcoldQ
1	Latitude	1	0.190476	-0.52381	-0.694623	0.166667	-0.89822	0.571429	-0.333333	-0.619048	0.571429	-0.0238095	-0.619048	-0.690476	-0.785714	-0.142857	-0.251502	0.452381	-0.738095	-0.238095	0.404762	0.619048	-0.404762
2	Longitude	0.190476	1	0.119048	-0.167668	0.238095	-0.203596	0.309524	0.047619	-0.285714	0.309524	-0.0238095	0.166667	-0.047619	-0.380952	-0.666667	-0.682647	-0.404762	0.190476	-0.619048	-0.52381	-0.285714	-0.547619
3	Altitude	-0.52381	0.119048	1	-0.119763	0.285714	0.251502	0.0714286	0.0714286	-0.142857	0.0714286	-0.595238	-0.0952381	0	0	0.380952	0.359288	0.0952381	0.261905	0.285714	-0.0952381	0	0.309524
4	AnnualMeanTemperature	-0.694623	-0.167668	-0.119763	1	-0.28743	0.861446	-0.718576	0.431145	0.826362	-0.718576	0.179644	0.886243	0.886243	0.89822	-0.119763	0.0060241	-0.670671	0.562884	0.0119763	-0.431145	-0.790433	0.239525
5	MeanDiurnalRangeT	0.166667	0.238095	0.285714	-0.28743	1	-0.359288	0.833333	0.666667	-0.761905	0.833333	-0.595238	-0.166667	0.0714286	-0.571429	-0.166667	-0.371264	0	-0.285714	-0.547619	-0.0238095	0.0714286	-0.571429
6	Isothermality	-0.89822	-0.203596	0.251502	0.861446	-0.359288	1	-0.766481	0.203596	0.80241	-0.766481	0.0838338	0.718576	0.718576	0.89822	0.0838338	0.228916	-0.634742	0.814386	0.311383	-0.550908	-0.778457	0.491027
7	TemperatureSeasonality	0.571429	0.309524	0.0714286	-0.718576	0.833333	-0.766481	1	0.261905	-0.97619	1	-0.333333	-0.547619	-0.404762	-0.904762	-0.238095	-0.443122	0.285714	-0.5	-0.547619	0.166667	0.428571	-0.690476
8	MaxTWarmMonth	-0.333333	0.047619	0.0714286	0.431145	0.666667	0.203596	0.261905	1	-0.0952381	0.261905	-0.214286	0.547619	0.761905	0.142857	-0.238095	-0.347312	-0.404762	0.047619	-0.571429	-0.190476	-0.428571	-0.404762
9	MinTColdMonth	-0.619048	-0.285714	-0.142857	0.826362	-0.761905	0.80241	-0.97619	-0.0952381	1	-0.97619	0.404762	0.666667	0.547619	0.952381	0.0952381	0.299407	-0.380952	0.52381	0.380952	-0.214286	-0.52381	0.547619
10	T_AnnualRange	0.571429	0.309524	0.0714286	-0.718576	0.833333	-0.766481	1	0.261905	-0.97619	1	-0.333333	-0.547619	-0.404762	-0.904762	-0.238095	-0.443122	0.285714	-0.5	-0.547619	0.166667	0.428571	-0.690476
11	MeanTWetQ	-0.0238095	-0.0238095	-0.595238	0.179644	-0.595238	0.0838338	-0.333333	-0.214286	0.404762	-0.333333	1	0.238095	0.0714286	0.285714	-0.452381	-0.323359	-0.190476	0.261905	-0.190476	-0.119048	-0.166667	-0.190476
12	MeanTDriQ	-0.619048	0.166667	-0.0952381	0.886243	-0.166667	0.718576	-0.547619	0.547619	0.666667	-0.547619	0.238095	1	0.928571	0.738095	-0.285714	-0.203596	-0.785714	0.571429	-0.238095	-0.547619	-0.857143	0.047619
13	MeanTWarmQ	-0.690476	-0.047619	0	0.886243	0.0714286	0.718576	-0.404762	0.761905	0.547619	-0.404762	0.0714286	0.928571	1	0.714286	-0.166667	-0.131739	-0.690476	0.47619	-0.238095	-0.428571	-0.785714	0.0238095
14	MeanTColdQ	-0.785714	-0.380952	0	0.89822	-0.571429	0.89822	-0.904762	0.142857	0.952381	-0.904762	0.285714	0.738095	0.714286	1	0.166667	0.335335	-0.428571	0.571429	0.357143	-0.238095	-0.595238	0.547619
15	AnnualPrecipitation	-0.142857	-0.666667	0.380952	-0.119763	-0.166667	0.0838338	-0.238095	-0.238095	0.0952381	-0.238095	-0.452381	-0.285714	-0.166667	0.166667	1	0.970077	0.547619	-0.261905	0.857143	0.547619	0.428571	0.833333
16	PwetM	-0.251502	-0.682647	0.359288	0.0060241	-0.371264	0.228916	-0.443122	-0.347312	0.299407	-0.443122	-0.323359	-0.203596	-0.131739	0.335335	0.970077	1	0.491027	-0.131739	0.934148	0.491027	0.347312	0.922172
17	PdriM	0.452381	-0.404762	0.0952381	-0.670671	0	-0.634742	0.285714	-0.404762	-0.380952	0.285714	-0.190476	-0.785714	-0.690476	-0.428571	0.547619	0.491027	1	-0.785714	0.357143	0.928571	0.97619	0.166667
18	Pseasonality	-0.738095	0.190476	0.261905	0.562884	-0.285714	0.814386	-0.5	0.047619	0.52381	-0.5	0.261905	0.571429	0.47619	0.571429	-0.261905	-0.131739	-0.785714	1	0.0714286	-0.857143	-0.833333	0.190476
19	PwetQ	-0.238095	-0.619048	0.285714	0.0119763	-0.547619	0.311383	-0.547619	-0.571429	0.380952	-0.547619	-0.190476	-0.238095	-0.238095	0.357143	0.857143	0.934148	0.357143	0.0714286	1	0.285714	0.238095	0.952381
20	PdriQ	0.404762	-0.52381	-0.0952381	-0.431145	-0.0238095	-0.550908	0.166667	-0.190476	-0.214286	0.166667	-0.119048	-0.547619	-0.428571	-0.238095	0.547619	0.491027	0.928571	-0.857143	0.285714	1	0.880952	0.166667
21	PwarmQ	0.619048	-0.285714	0	-0.790433	0.0714286	-0.778457	0.428571	-0.428571	-0.52381	0.428571	-0.166667	-0.857143	-0.785714	-0.595238	0.428571	0.347312	0.97619	-0.833333	0.238095	0.880952	1	0.0238095
22	PcoldQ	-0.404762	-0.547619	0.309524	0.239525	-0.571429	0.491027	-0.690476	-0.404762	0.547619	-0.690476	-0.190476	0.047619	0.0238095	0.547619	0.833333	0.922172	0.166667	0.190476	0.952381	0.166667	0.0238095	1
